# Supplementary material
Source: publisher site journal article supplement (doi:10.18632/aging.103728)
Supplement: Supplementary file 2 [file aging-v12-103728-supplementary-material-SD2.pdf]

## SUPPLEMENTARY TABLES

**Supplementary Table 1. List of primer sequences for Real-time PCR.**

| Genes          | Forward primer        | Reverse primer        |
|----------------|-----------------------|-----------------------|
| <b>Notch1</b>  | CGGGGCTAACAAAGATATGC  | CACCTTGGCGGTCTCGTA    |
| <b>Jagged1</b> | GGGCAACACCTTCAACCTC   | GCCTCCACAAGCAACGTATAG |
| <b>HES1</b>    | CGGACATTCTGGAAATGACA  | TACTTCCCCAGCACACTTGG  |
| <b>Twist1</b>  | GTCCGCAGTCTTACGAGGAG- | TGGAGGACCTGGTAGAGGAA  |
| <b>GAPDH</b>   | TCATTGACCTCAACTACATGG | TCGCTCCTGGAAGATGGTG   |

**Supplementary Table 2. List of primer sequences for gene amplification.**

| Genes       | Forward primer                          | Reverse primer                          |
|-------------|-----------------------------------------|-----------------------------------------|
| <b>NICD</b> | AGTCGCTAGCATGGTGCTG<br>CTGTCCCGCAAGCGCA | GTACCGGTGGCTTAAATGC<br>CTCTGGAATGTGGGTG |

**Supplementary Table 3. List of shTwist1 and control RNA sequences.**

| Genes             | Forward primer                                                                    | Reverse primer                                                                      |
|-------------------|-----------------------------------------------------------------------------------|-------------------------------------------------------------------------------------|
| <b>shTwist1 A</b> | GAT CCG ATG GCA AGC TGC AGC TAT TTC<br>AAG AGA ATA GCT GCA GCT TGC CAT CTT<br>TTT | AAT TCA AAA AGA TGG CAA GCT GCA GCT<br>ATT CTC TTG AAA TAG CTG CAG CTT GCC<br>ATC   |
| <b>shTwist1 B</b> | GAT CCG CTG AGC AAG ATT CAG ACC TTC<br>AAG AGA GGT CTG AAT CTT GCT CAG CTT<br>TTT | AAT TCA AAA AGC TGA GCA AGA TTC AGA<br>CCT TCA AGA GAG GTC TGA ATC TTG CTC<br>AGC G |
| <b>Control A</b>  | GAT CCA TGC GAG ACG TAC GCA TTG TTC<br>AAG AGA CAA TGC GTA CGT CTC GCA TTT<br>TTT | AAT TCA AAA AAT GCG AGA CGT ACG CAT<br>TGT CTC TTG AAC AAT GCG TAC GTC TCG<br>CAT G |
| <b>Control B</b>  | GAT CCA TGC TAC TAG ACG CGA ACG TTC<br>AAG AGA CGT TCG CGT CTA GTA GCA TTT<br>TTT | AAT TCA AAA AAT GCT ACT AGA CGC GAA<br>CGT TCA AGA GAC GTT CGC GTC TAG TAG<br>CAT G |
