# Supplementary material
Source: publisher site journal article supplement (doi:10.18632/aging.103728)
Supplement: Supplementary file 3 [file aging-v12-103728-supplementary-material-SD3.xlsx]

## Sheet: Sheet1
Supplementary Information 1. Raw data of microarray assay for gene expression on GSCs.
	GSC2	GSC3	GSC5	GSCR2	GSCR3	GSCR4	GSCR5
STAT1	7.97731	7.9477	7.95423	7.70067	7.65882	7.72984	7.80905
GAPDH	14.0798	14.0863	14.0721	13.9706	13.9657	14.0006	13.5559
ACTB	13.5968	13.5955	13.5579	13.3672	13.3721	13.3678	13.0491
PRPF8	10.3636	10.3559	10.2669	10.0761	10.0457	9.96409	9.66202
CAPNS1	12.2012	12.2063	12.1431	12.0112	11.9938	11.9914	11.6023
RPL35	13.3296	13.3175	13.2889	13.306	13.3015	13.3233	13.5124
RPL28	13.818	13.8063	13.7695	13.7554	13.7689	13.7508	13.5501
EIF4G2	13.0399	13.0917	13.1464	13.0746	13.0577	13.0778	12.9883
EIF3D	11.3511	11.3661	11.3217	11.5082	11.5012	11.4792	11.6251
PARK7	12.5059	12.5065	12.4721	12.5405	12.5284	12.5328	12.8244
SRP14	12.1785	12.1403	12.1046	11.7869	11.7334	11.8059	11.506
GDI2	11.244	11.3128	11.1959	11.265	11.2815	11.2779	10.9284
RPL11	12.9705	12.9717	12.9657	13.044	13.0133	13.0469	13.2979
ARF3	9.97737	9.96132	9.90496	9.78926	9.80445	9.8195	9.69044
RPL21	13.3192	13.3571	13.3308	13.4156	13.3665	13.434	13.4994
RPL24	13.4884	13.4748	13.4589	13.4506	13.4473	13.4799	13.5529
HNRNPC	12.2599	12.2401	12.304	12.0382	12.0442	12.1113	12.2148
2002-09-01	11.6601	11.7488	11.6876	11.984	11.9571	11.9748	12.0067
HNRNPA1	13.365	13.3832	13.4014	13.28	13.2715	13.2833	13.7489
RPS27A	13.2507	13.2534	13.3074	13.3366	13.3006	13.2991	13.7392
RPS13	13.719	13.7109	13.6834	13.7565	13.7776	13.7753	13.432
FAU	12.9993	13.0001	12.9735	12.9341	12.9673	12.9511	13.272
TARDBP	10.7993	10.861	10.8005	10.7614	10.749	10.718	11.0863
CFL1	13.591	13.5224	13.4941	13.1524	13.1922	13.1893	12.7931
RPL18	13.5564	13.5453	13.5019	13.5265	13.5245	13.5279	13.2824
EIF3F	12.2455	12.2774	12.2012	12.4136	12.4266	12.4113	12.2645
RPS5	13.7519	13.7208	13.6925	13.8209	13.8196	13.8646	13.8061
RPL27	13.6149	13.6386	13.6233	13.7319	13.7258	13.7311	13.9071
RPL34	12.518	12.5232	12.5571	12.633	12.6	12.6026	12.8308
NARS	11.8974	11.9161	11.8997	11.8868	11.8763	11.9261	11.4115
STARD7	10.5348	10.4818	10.3783	10.5882	10.5871	10.6771	10.4162
RPL19	13.427	13.4339	13.3834	13.3314	13.3545	13.3427	13.4727
SLC25A3	12.9825	12.992	12.9349	13.058	13.0567	13.0577	13.1832
RPS11	13.8874	13.9262	13.8849	13.9201	13.9317	13.9317	14.056
RPL9P7 /// RPL9	13.2609	13.2686	13.2239	13.351	13.3057	13.3643	13.2767
DDX5	12.5865	12.5622	12.6086	12.4494	12.428	12.4584	12.7354
RPL6 /// RPL6P27	13.5552	13.5421	13.545	13.6459	13.611	13.6324	13.9003
CTDNEP1	9.85021	9.81615	9.7169	9.40263	9.34411	9.39112	9.40539
RPL10A	12.6291	12.6577	12.6298	12.7464	12.7622	12.7692	12.7603
CBX3	11.9051	11.9212	11.9651	11.5737	11.5733	11.6531	11.0824
RPL17 /// C18orf32 /// RPL17-C18orf32	13.4459	13.4353	13.4429	13.4726	13.4816	13.5102	13.1617
PSMB2	11.4729	11.4804	11.412	11.4926	11.4615	11.5031	11.2806
KHDRBS1	11.2194	11.1706	11.2292	11.0577	11.0457	11.0445	11.2198
DDX39B /// ATP6V1G2-DDX39B	10.9124	10.9649	10.904	10.636	10.6421	10.6359	10.3861
RTCB	10.2386	10.2773	10.1149	10.2701	10.2501	10.237	10.0241
ERH	12.7743	12.7565	12.7583	12.6629	12.6747	12.6786	12.8914
SRSF9	11.3576	11.374	11.4117	11.2582	11.2534	11.2972	11.1104
ABCF1	9.41508	9.44029	9.36154	9.52776	9.57122	9.43889	9.74006
DAD1	12.0446	12.0747	12.0116	12.0894	12.0898	12.0648	11.9567
YY1	11.3264	11.3604	11.4504	11.4042	11.347	11.374	10.8915
JTB	12.0693	12.0435	12.0273	11.7015	11.7115	11.7358	11.545
KAT7	8.38685	8.42696	8.34166	7.75063	7.84626	7.83769	7.33497
ZNF146	11.3587	11.383	11.4757	11.564	11.4796	11.4944	11.7885
SART1	8.34829	8.37299	8.22058	8.3559	8.36847	8.33565	8.07409
ILF2	11.6266	11.6527	11.6067	11.4173	11.3537	11.4453	11.0089
SPAG7	9.78527	9.74647	9.65851	9.81798	9.81493	9.80952	10.0412
ZPR1	8.77312	8.81294	8.6999	8.65555	8.64606	8.62649	9.04215
TAF10	11.5411	11.5132	11.3873	11.52	11.5227	11.5212	11.5023
C1D	9.75537	9.69342	9.7911	9.79815	9.80016	9.82252	10.2789
NONO	12.565	12.5862	12.515	12.6205	12.6145	12.619	12.4769
SNRNP200	10.1627	10.2263	10.1214	9.92138	9.90708	9.92019	9.99194
RHOA	12.472	12.5	12.5023	12.5179	12.4937	12.515	12.2449
RNPS1	11.0804	11.1621	11.1543	10.9917	11.0068	10.972	10.6885
RPS24	13.8149	13.8156	13.7951	13.8748	13.8587	13.8927	13.5281
RPL30	13.3818	13.3726	13.3742	13.166	13.1593	13.1727	12.8302
NPM1	13.6558	13.6507	13.663	13.6387	13.6275	13.6464	13.2863
HSP90AB1	12.8804	12.8736	12.8038	12.5894	12.6194	12.5553	12.3157
ARF1	12.1155	12.147	12.0263	11.0148	11.0131	11.001	11.0054
IK	9.92015	9.95262	9.81672	9.73307	9.74239	9.75166	9.30052
SNX3	11.2527	11.2638	11.2208	11.1741	11.1247	11.2476	11.645
CANX	12.3253	12.3097	12.2676	11.8263	11.778	11.8222	11.6372
SART3	8.87521	8.99438	8.87717	8.40788	8.34788	8.39872	8.67959
CNPPD1	7.42568	7.46605	7.47158	7.37957	7.30685	7.28793	6.96916
SMNDC1	10.1612	10.1898	10.1814	10.0111	10.0178	9.97902	10.0911
HNRNPM	11.823	11.8627	11.7417	11.4305	11.4274	11.4145	11.0278
HNRNPD	11.902	11.9105	12.0631	11.7576	11.6316	11.8091	12.0666
RPL14 /// RPL14P1	12.6163	12.618	12.6012	12.6293	12.6164	12.6382	12.4284
GUK1	9.42112	9.41762	9.31579	9.17022	9.11229	9.20404	8.737
KXD1	9.49168	9.3933	9.31908	9.22142	9.30615	9.22136	9.61629
OAZ1	13.1518	13.1352	13.0983	12.9447	12.9436	12.9849	13.0938
ATP6V0B	10.1676	10.2173	10.1452	10.193	10.1785	10.1691	9.68683
KARS	11.5238	11.5106	11.4916	11.1792	11.2327	11.2653	10.7135
H3F3A /// H3F3AP4	13.0055	13.1327	13.2521	13.165	13.1168	13.1541	13.3767
RPS6	13.6931	13.6971	13.6684	13.7427	13.7428	13.7185	14.0023
RPS7	13.3988	13.3924	13.3497	13.4035	13.408	13.4006	13.084
USP22	10.8155	10.9157	10.8018	10.8797	10.8739	10.8888	10.9484
C11orf58	11.5608	11.5754	11.5525	11.5083	11.429	11.5464	11.1144
TCEB2	12.18	12.1836	12.1295	12.2631	12.2557	12.2159	12.6711
COX4I1	12.3133	12.3024	12.2663	12.2812	12.2907	12.2796	12.7028
TMED2	12.2486	12.2747	12.2657	12.4118	12.3947	12.4307	12.6169
RPL12	13.4851	13.4752	13.438	13.588	13.5791	13.572	13.8362
RPL4	13.5419	13.5168	13.5284	13.6214	13.6126	13.6371	13.559
FNTA	11.0044	10.9746	10.9891	11.4977	11.4516	11.4659	11.4191
RPS25	12.6903	12.6515	12.7581	12.8307	12.7608	12.8596	12.3727
RPL37	13.5467	13.5784	13.525	13.6577	13.6232	13.6779	13.3881
HINT1	12.4108	12.4711	12.5056	12.3755	12.342	12.368	12.0334
EEF2	12.3674	12.3207	12.2592	12.0688	12.0281	12.016	11.6129
RPS10	13.5544	13.5631	13.5407	13.5691	13.5555	13.5738	13.5435
ATP6V0E1	11.7982	11.7671	11.736	11.9377	11.9224	11.9694	12.0101
HNRNPK	11.8681	11.8319	11.9175	11.6273	11.642	11.6633	11.8911
ANAPC5	11.1224	11.1585	11.1574	11.1969	11.1814	11.1986	11.1049
RPS3A /// RPS3AP5	13.7383	13.7482	13.7989	13.4409	13.4277	13.4663	13.5096
HIST1H3G	3.97625	3.95231	3.99565	3.93325	4.21356	3.9397	3.62186
TNFAIP8L1	6.19886	6.20161	6.1579	5.92581	5.86284	6.11497	5.61534
OTOP2	5.84461	5.88936	5.91099	6.05503	5.84027	5.88232	5.84019
C17orf78	3.76577	3.98417	3.71794	3.93729	3.91918	3.88331	3.88548
CTAGE6 /// CTAGE15	4.00647	4.06707	4.06897	3.8591	3.86147	3.87317	4.15072
F8A1 /// F8A2 /// F8A3	7.98258	8.00632	7.84313	7.83153	7.83843	7.89292	7.59512
LINC01098	3.93867	3.68412	4.02967	4.02261	3.99508	4.09862	3.90463
SAMD7	4.33464	4.15915	4.31031	4.4027	4.71691	4.37236	4.65957
ARRDC5	6.17118	6.19346	6.28502	6.44656	6.36524	6.06649	6.13263
CGB /// CGB5 /// CGB7 /// CGB8 /// CGB1 /// CGB2	8.89959	8.65037	8.65334	8.8863	8.9937	9.11233	8.51471
ERICH3	2.96598	3.15177	3.12301	3.146	3.32386	3.24589	3.1089
FAM86C1	8.41275	8.38236	8.43584	8.83331	8.82791	8.75512	8.91293
HIST1H2BI	2.92209	3.05124	2.92234	2.89827	2.92234	2.92055	2.46645
HIST1H4E	4.53777	4.67877	4.69732	4.30187	4.53621	4.31724	4.27646
HIST1H2AJ	3.43484	3.38791	3.69447	3.58754	3.29777	3.62775	3.59745
HIST1H2BF	3.7081	3.68956	3.76124	4.0727	4.09873	4.00604	3.95274
C2CD4B	3.94286	3.8622	3.97363	4.06619	4.11794	4.04494	4.10952
HIST1H2BE	5.50793	5.11855	5.15347	5.40551	5.49478	5.34412	5.47277
HIST1H3A	4.15406	4.0713	3.97124	4.10212	3.88737	4.1112	3.56935
RAB3D	6.25162	6.17572	6.06989	6.09083	6.10212	6.19937	6.37507
PDZD9	3.94073	3.94805	4.0628	4.06663	4.33024	4.1101	4.60597
CACNG8	7.95284	7.87933	8.09417	8.24705	8.19664	8.12148	8.39544
MORC2	8.7116	8.74542	8.61646	8.43249	8.4127	8.46848	8.8529
HIST1H2BN	7.03078	6.9131	6.75591	6.92557	6.95327	6.96846	6.44896
GPR32	3.37087	3.47835	3.63883	3.6578	3.63873	3.59785	3.67167
PCDHGB5	6.49791	6.53564	6.60136	6.68358	6.72429	6.60718	7.13779
ZNF600	7.59464	7.44848	7.57595	7.76301	7.70472	7.78654	8.09153
KRTAP6-2	6.73489	6.79467	6.70221	6.76181	6.68173	6.52015	6.34958
KRTAP20-1	4.13602	3.77134	3.8374	3.93107	4.04248	3.8501	4.39815
HIST1H2BH	2.942	3.0579	3.04048	3.01579	3.10147	3.23819	3.12241
PCDHGA1	2.72745	2.35427	2.50727	2.57258	2.49193	2.49193	2.12996
GLIPR1L2	2.61939	2.48592	2.65947	2.73196	2.71522	2.5911	2.41795
SNAPC5	5.54662	5.6836	5.55413	5.5375	5.45507	5.45489	5.66503
OR8U1 /// OR8U9	5.36412	5.13298	5.09977	5.01156	5.33976	5.00621	4.6964
SSX7 /// SSX2B	8.18904	8.11005	8.22313	8.41514	8.43801	8.25783	8.50257
IFNA10	2.67958	2.67556	2.88352	2.7486	2.67556	2.67185	3.08841
PCDHA13	6.10769	6.0842	6.11889	6.04725	6.06356	6.05664	6.01073
PCDHGB3	4.85054	4.83468	5.2172	5.18334	5.12201	5.12947	4.67824
GSC2	3.87599	3.67352	3.71895	3.77595	3.96164	3.67674	3.73375
OR9Q2	4.58979	4.5794	4.76617	4.93956	4.84259	4.80149	4.89355
KRTAP19-7	5.81645	5.7766	5.82762	5.68386	5.67089	5.93532	5.91433
KRTAP20-2	5.51659	5.32303	5.45491	5.32606	5.43864	5.43016	5.07427
MAATS1	4.10793	4.43439	4.22588	4.3178	4.16432	4.03318	4.50895
HIST2H2AB	3.38632	3.48976	3.51325	3.47356	3.5197	3.46816	3.98342
PCDHA4	6.78034	6.70059	6.64406	6.94267	6.95808	6.8346	7.38956
PRB3	4.57098	4.61727	4.61383	4.81769	4.73966	4.717	4.53771
PCDHGB1	3.60424	3.86922	3.72164	3.75723	3.80217	3.8082	4.17939
ZNF675	2.66091	2.9631	3.09944	3.38486	3.03085	3.20417	2.75064
TUBB7P /// TUBB8P7 /// TUBB8 /// TUBBP5	8.36706	8.53158	8.37723	8.17593	8.15174	8.08901	7.88791
KRTAP6-1	11.4114	11.3237	11.3607	11.4377	11.3487	11.2757	11.8078
KRTAP19-2	3.21875	3.21308	3.12951	3.21356	3.2828	3.34285	3.6419
KRTAP19-4	3.02459	3.2491	3.00821	3.08849	3.05017	2.91533	3.02148
SFT2D1	10.0633	10.085	10.0289	10.3766	10.392	10.4162	10.6207
LOC650293	3.27984	3.58001	3.54017	3.64809	3.55346	3.84314	3.81522
KRTAP21-2	5.54223	5.94393	5.78306	5.78306	5.97325	5.75225	6.19377
HIST1H2AK	5.56457	5.55386	5.36712	5.34133	5.23539	5.20401	5.10682
DEFB128	3.75056	3.54488	3.5633	3.68218	3.55842	3.68184	3.7471
IGLL3P	3.8591	4.09546	3.72542	3.89912	3.57661	3.89975	3.7816
DNAJC12	9.46617	9.51181	9.51276	10.016	10.0258	10.0063	10.4064
ARHGAP22	5.54968	5.62546	5.56487	5.68248	5.81487	5.75818	5.5268
POU3F3	4.63454	4.83215	4.47342	4.73647	4.65018	4.55547	5.0532
PLEKHG2	7.25112	7.30737	7.4795	7.37033	7.46929	7.45586	7.14912
HNRNPCL1	3.20417	3.52198	3.47835	3.12625	3.42397	3.11341	2.87799
DEPDC5	5.58211	5.37525	5.46789	5.58076	5.65479	5.5564	5.62621
KRTAP10-12	9.25046	9.15063	9.22058	9.33949	9.39192	9.37661	9.60377
KRTAP10-1	7.79812	7.77409	7.87364	8.02118	7.99198	8.00007	7.90864
KRTAP10-3	8.96655	8.8412	8.89973	9.11493	9.1023	9.11562	8.84593
TDRKH	5.60539	5.68129	5.87727	5.87727	5.99633	5.70794	6.17736
OR2A14	9.07412	8.97837	9.13138	9.13909	9.17441	9.00739	9.46222
KRTAP19-1	3.65828	3.72342	3.55297	3.89964	3.94809	3.72016	3.8411
CGB1 /// CGB2	3.05631	2.89798	2.74578	3.17729	2.97423	2.90344	3.16912
KRTAP10-9	8.23327	8.16632	8.25566	8.46013	8.54925	8.49877	8.56705
ZNF391	3.70294	3.88085	4.02631	4.1927	4.1112	4.08229	3.82415
RPL38	11.8555	11.8624	12.0048	12.2217	12.2035	12.1557	11.7629
PRB1	5.36378	5.33503	5.22021	5.38602	5.21821	5.49211	4.8906
H3F3C	2.54	2.54155	2.50502	2.59281	2.48611	2.62658	2.32905
H3F3B /// H3F3C	12.7937	12.7883	12.8819	12.9169	12.9047	12.9797	12.6194
FAM221A	3.23484	3.17487	3.15316	3.26367	3.1317	3.21854	3.55855
UNCX	9.02403	9.03667	9.01114	9.0077	8.9834	8.99144	8.94027
ZNF835	6.1703	6.01756	6.12495	6.13821	6.10924	6.19533	6.58088
IMPACT	6.43889	6.50169	6.59285	6.88658	6.74091	6.63981	7.1444
TMEM211	5.75637	5.88571	5.96642	6.08021	5.98578	5.97891	6.20611
PYGO1	5.89734	6.09742	5.98288	5.87558	5.96421	5.74694	5.55589
DUX4L1 /// DUX4L8 /// DUX4L11 /// DUX4L10 /// DUX4L12 /// DUX4L15 /// DUX4L4 /// DUX4L7 /// DUX4L6 /// DUX4L5 /// DUX4L3 /// DUX4L14 /// DUX4L2 /// DUX4 /// DUX4L13 /// DBET /// DUX4L25 /// DUX4L24 /// DUX4L23 /// DUX4L22 /// DUX4L21 /// DUX4L20	7.84417	7.86918	7.89053	7.93924	8.00258	7.96578	7.84566
TCEAL1	9.68353	9.72112	9.70777	9.81693	9.83732	9.84515	10.017
ATP13A5	4.26929	4.13542	4.25257	4.48387	4.53284	4.50902	4.73983
HIST2H2AC	3.69151	3.7206	3.84679	3.4501	3.6357	3.52331	3.84364
PSG4	3.85254	3.67114	3.86674	3.91314	3.8971	3.88365	4.08294
WDFY4	5.13822	5.10254	5.25091	5.15631	5.2175	5.21918	4.84283
CLCN6	6.08354	6.20154	6.20714	6.16534	6.46204	6.26868	6.27478
SCAND1	10.6367	10.6303	10.5515	10.5136	10.5656	10.4975	10.8055
PNMAL1	8.94581	8.9836	8.83784	8.66555	8.71556	8.64255	9.05772
ZNF680	5.53602	5.66321	5.59602	5.47158	5.72146	5.64548	5.34652
DUX5 /// DUX3 /// DUX1	3.92388	3.62789	3.77396	3.71934	3.63018	3.66833	4.03356
MARK4	5.02923	4.97016	4.94788	4.97263	4.9655	5.17457	4.78811
GRK7	4.39739	4.32915	4.4497	4.59506	4.49798	4.6228	4.65388
UGT2B28	3.16612	2.9815	3.04123	2.89827	2.87849	2.88842	3.12461
MOGAT2	4.73637	4.77899	4.4635	4.638	4.46085	4.46363	4.20359
FAM127A	10.9249	10.8801	10.837	10.5591	10.5632	10.5564	10.3264
HIST1H2AI	4.47307	4.60997	4.47731	4.30908	4.48694	4.44133	4.82574
C2orf44	7.24141	7.18652	7.21723	7.10196	7.11844	7.10619	6.77069
NSUN5	8.5932	8.66663	8.57073	8.36458	8.31978	8.26257	8.79662
MAGI3	7.4677	7.48236	7.47097	7.2661	7.10712	7.10685	6.72676
RNASE8	5.22919	5.27684	5.26072	5.3744	5.47	5.34674	5.53184
ACOXL	5.00901	5.09476	5.29467	5.19931	5.01056	5.11015	5.32951
VPS54	8.69885	8.79428	8.68601	8.89883	8.76762	8.82977	8.95606
PCDHA6	5.05484	4.90858	5.05733	5.18837	5.21074	5.09609	5.63048
PCDHA7	5.35749	5.25489	5.46897	5.39896	5.64754	5.5349	5.72895
SLC51B	5.76849	5.91003	5.77477	5.79445	5.78283	5.7824	5.94261
GRIP2	5.27981	5.19121	5.26774	5.41991	5.6136	5.43542	5.47437
PARD6A	6.68062	6.61743	6.52765	5.96867	6.11159	5.95539	6.29316
RPL36	11.586	11.6133	11.4136	11.5432	11.5367	11.523	11.8774
SPATC1L	5.43328	5.15625	5.07065	5.26324	5.29764	5.53026	5.51855
UCN	6.93582	6.78655	6.72172	7.10745	7.25567	7.22239	6.99049
UQCRHL	10.9445	10.8231	10.9427	10.8552	10.7338	10.6535	11.0925
PCDHGA12	3.33759	3.34015	3.51131	3.5267	3.25734	3.43363	3.50418
RPL9P7 /// RPL9 /// TIPIN /// RPL9P25 /// RPL9P32	13.0716	13.1001	13.2575	13.3193	13.2741	13.2666	13.7348
RPL9	12.2826	12.3435	12.3794	12.5728	12.5557	12.55	12.5064
IFITM3	7.33488	7.37326	7.27202	7.5746	7.54126	7.5415	7.33982
ZNF184	6.43522	6.45402	6.47865	6.28315	6.26922	6.25371	6.33095
LCE1D	8.88057	8.8317	8.85083	9.10541	9.18016	9.08507	8.96805
LCE3D	5.4247	5.45294	5.37195	5.46392	5.36391	5.52585	5.03563
LCE1F	7.87831	7.80601	7.57258	7.93483	7.95563	8.08584	8.44403
LCE1A	8.5773	8.47071	8.47155	8.7474	8.84844	8.69704	8.37007
IGLL1	5.73986	5.8654	5.94736	6.02298	6.04591	6.00956	6.34582
ADGRB1	6.36331	6.39923	6.18652	6.46693	6.5126	6.55192	6.04317
CRISP2	2.90962	3.1934	3.1172	3.30518	3.12427	3.22313	3.21385
MAGEA12	2.53503	2.57506	2.71374	2.57051	2.70355	2.58202	2.32816
KIAA0825	4.0828	4.33829	4.47628	4.57933	4.35087	4.54247	4.49866
CHST7	8.193	8.2929	8.19581	8.72322	8.71639	8.84102	8.85042
RSRC1	8.80869	8.74142	8.90225	8.15117	8.14726	8.30062	8.34384
KRTAP10-10 /// KRTAP10-6	8.14874	8.00914	8.0472	8.24142	8.23804	8.33818	8.05798
DEFB134 /// LOC105379765	4.57176	4.60688	4.72307	4.83115	4.69115	4.88381	5.046
TAS2R30	3.71373	3.7266	3.54964	3.78991	3.69006	3.80104	4.14048
XAGE3	4.23505	4.18058	4.18299	4.2612	4.34245	4.31757	4.22005
PTMS	9.1361	9.04307	9.03376	8.75562	8.7565	8.79547	8.64601
IFNA5	3.53817	3.41115	3.44879	3.29423	3.52218	3.34108	3.7171
RRNAD1	7.5988	7.66381	7.68025	7.73123	7.72384	7.61797	7.36432
HNRNPCL2 /// HNRNPCL3 /// HNRNPCL4	3.20417	3.1421	3.53743	3.22996	3.39402	3.28426	3.25727
MTNR1A	5.80285	5.63699	5.82218	5.86675	5.85571	5.84431	5.77695
SPEF2	3.46512	3.10219	3.468	3.43047	3.83241	3.52546	3.49074
UTS2R	7.3888	7.33523	7.2025	7.42183	7.47358	7.47012	7.30712
FIG4	7.86596	7.99221	7.80349	7.66311	7.59773	7.60085	7.72713
PKD1L3	3.7361	3.63435	3.70657	3.62335	3.61266	3.62513	3.32502
EPPK1	3.66951	3.8491	3.72415	3.60001	3.74119	3.83744	3.33607
GP1BB /// SEPT5 /// SEPT5-GP1BB	6.58086	6.43672	6.47097	6.55158	6.58339	6.50292	6.10064
ALG1L	4.52556	4.63325	4.57407	4.69169	4.53677	4.69559	4.97253
KLF7	6.31132	6.47332	6.49205	6.63132	6.47164	6.41807	6.26997
UGT2B11	2.7821	2.72226	2.68124	2.7258	2.66483	2.71449	2.26145
TPM2	6.13805	5.85299	5.91076	8.61064	8.51412	8.67059	8.11234
SSX1	2.70061	2.68533	2.62945	2.69249	2.71232	2.71232	2.90268
AURKAIP1	10.2589	10.302	10.2257	10.151	10.0953	10.1544	9.97129
PGAM4	4.12452	4.49199	4.24048	4.02592	3.64729	3.97321	3.42304
KRT17	4.70335	4.78764	4.65287	5.42151	5.13198	5.24849	5.27386
ASIP	4.92731	4.61351	4.94517	4.96722	4.91419	5.00444	5.19578
CCKAR	5.38582	5.08228	5.27089	5.21824	5.18089	5.18539	4.70441
C15orf40	6.55961	6.67373	6.55961	6.55906	6.69489	6.41399	7.0717
CASP14	4.07711	3.89612	3.84162	3.58917	3.91597	3.79787	3.32651
AGRP	5.82011	5.80328	5.64427	5.94027	5.92671	5.78901	6.27315
CLDN3	5.90037	6.09329	6.08327	6.77051	6.70537	6.76657	6.52764
TBX5	3.39992	3.36998	3.43694	3.52766	3.4715	3.59384	3.59344
ST8SIA1	4.21543	4.25648	4.33114	4.34431	4.30968	4.32659	4.82252
TRPT1	3.50244	3.662	3.68426	3.72132	3.49781	3.3906	3.89466
HECTD2	4.35465	4.23636	4.0901	3.52627	3.49946	3.67436	3.44445
CCL27	5.0145	5.06974	4.90771	5.02146	5.00393	5.10325	5.11814
KRT33A	7.47466	7.56697	7.48067	7.57195	7.70093	7.65255	7.59061
FXN	4.34828	4.50193	4.67822	4.46096	4.57017	4.57124	4.15456
SH2D2A	3.47333	3.3914	3.31129	3.53143	3.45999	3.48141	3.48405
PRAMEF8	5.01436	5.13894	5.35596	5.29173	5.41991	5.27562	5.65495
SSX3	2.86771	2.93373	2.81823	2.78431	2.90234	2.81581	3.32326
NOP16	11.0816	11.0824	10.9868	10.9551	10.9611	10.9722	11.1497
NT5C1A	4.93166	4.42567	4.75447	4.79722	4.77361	4.89267	4.54407
CEMP1	7.099	6.89868	7.01502	7.16112	7.0448	7.04992	7.15672
PLCB3	5.95049	6.07012	5.86681	5.60801	5.77511	5.55947	5.3518
HOXA10	7.54268	7.57207	7.75127	7.56898	7.41065	7.59456	7.77935
AREG	8.84937	8.82859	8.9647	9.08993	9.05911	9.16426	8.96781
MLXIPL	7.38632	7.22942	7.23641	7.36537	7.32034	7.42227	7.2712
DEFB103B /// DEFB103A	3.45941	3.47835	3.53013	3.34015	3.4128	3.29429	2.97301
FOXC2	5.88571	5.94154	5.93934	5.88855	5.99891	5.78613	6.01731
LHB	8.99291	8.83074	8.77833	8.97954	9.00003	9.07637	9.32818
RABGEF1	4.62224	4.57699	4.51407	4.73677	4.65313	4.45366	4.8755
HLA-C	4.40119	4.40786	4.48478	4.7059	4.54903	4.50299	4.67668
CYP2C19	3.3857	3.59831	3.33657	3.53778	3.62144	3.43671	3.41056
MAGEA1	3.02827	3.0869	3.25891	3.19812	3.07359	2.92438	2.77229
TTN	3.98101	3.76387	3.88374	4.01821	3.93639	4.11141	4.2333
KRTAP10-8	8.78972	8.67083	8.59071	8.9453	9.04504	8.9939	9.07371
FABP12	2.9407	2.8948	2.85504	2.83214	2.86291	2.77192	3.04624
NKX1-2	6.88168	6.79795	6.69518	6.78699	6.88808	6.79538	6.47997
PPIAL4G /// PPIAL4D /// PPIAL4A /// PPIAL4C /// PPIAL4F /// PPIAL4E /// LOC105371242	2.85646	2.71361	3.02872	2.99745	2.99167	2.97228	2.63293
VSTM5	7.99682	7.9873	8.10035	8.26729	8.38051	8.23353	8.20651
CBWD1 /// CBWD3	8.00221	8.13395	8.40213	8.22979	8.23194	8.39232	7.74009
SPATA31D3	7.06103	7.17619	7.21841	7.20745	7.34784	7.15608	7.39553
SLC6A15	5.70248	5.59157	5.62547	4.99754	5.00157	5.04205	5.19493
ZNF735	5.02618	4.95162	5.04281	5.32745	5.30868	5.32214	4.99098
DSN1	9.98591	10.0017	10.0511	9.49929	9.43207	9.49929	9.75624
NXNL2	5.05235	5.22991	5.27038	5.2871	5.11926	5.15806	4.72698
OR6P1	4.17482	4.25341	4.38071	4.41695	4.24143	4.5421	4.69522
SP9	6.69749	6.67776	6.83764	7.04576	7.02172	6.97772	6.66221
GH1 /// GH2	7.21391	7.13973	7.00589	7.04886	7.31711	7.31869	7.46308
DCAF12L2	5.21429	5.02871	5.2172	5.3231	5.08859	5.07783	5.08238
CT47A11 /// CT47B1 /// CT47A7 /// CT47A10 /// CT47A9 /// CT47A8 /// CT47A6 /// CT47A5 /// CT47A4 /// CT47A3 /// CT47A2 /// CT47A1 /// CT47A12	3.46872	3.41917	3.35462	3.69393	3.61927	3.47835	3.87868
MROH9	3.60494	3.27145	3.56719	3.375	3.58712	3.38254	3.70364
BRI3	5.03027	5.36116	5.36927	5.38648	5.61589	5.40585	5.94845
MUC16	4.83119	4.65149	4.74318	4.79959	4.8482	4.87126	4.99786
GSTP1	12.4603	12.5071	12.4576	12.5894	12.574	12.5569	12.8553
ADAMTS15	5.56341	5.66237	5.58227	5.76483	5.85784	5.79374	5.63137
EBI3	6.15382	6.22002	6.16985	7.70646	7.79641	7.91186	7.33396
HBB	3.73397	3.90763	3.59308	3.73967	3.88305	4.00641	3.31165
COX7C	13.2361	13.2497	13.2693	13.3888	13.3794	13.4041	13.6527
COL1A1	5.52996	5.59941	5.24588	5.28388	5.44578	5.47443	5.12756
COL1A2	3.45522	3.35193	3.39706	3.31953	3.39984	3.38654	3.29572
RPS21	13.6867	13.6695	13.5984	13.6691	13.6762	13.6743	14.0899
CST3	10.5442	10.538	10.3303	10.6285	10.6287	10.6347	10.2826
TIMP1	10.7677	10.8485	10.6741	10.8937	10.8879	10.8764	10.613
A2M	4.53649	4.4871	4.48317	4.58877	4.7716	4.50134	4.37307
SPDEF	8.37746	8.44276	8.50499	8.11613	8.12326	8.21122	7.79678
SERPING1	3.40615	3.38034	3.13831	3.40304	3.59906	3.57636	3.96354
NDUFA4	12.693	12.6563	12.6258	12.665	12.6584	12.681	12.3142
LGALS3BP	9.84666	9.97011	9.81376	10.3518	10.3521	10.3342	10.1822
UBA1	10.1987	10.2137	10.1154	9.79192	9.8594	9.81366	9.36007
MDH1	11.851	11.9265	11.9981	12.2372	12.2061	12.2662	12.5778
TRIM28	10.964	10.9536	10.8027	10.5989	10.5736	10.5544	10.8478
CALR	8.23476	8.27033	8.11669	8.48633	8.47391	8.60347	8.59567
TG	5.29085	5.30786	5.35092	5.44984	5.48686	5.29761	5.49827
LAPTM4B	11.3593	11.4395	11.3135	9.59024	9.67535	9.64824	9.91268
PLD3	8.6019	8.59676	8.52632	8.8038	8.82763	8.79517	8.90302
PHB2	12.0455	12.0147	11.9999	11.9447	11.9643	12.0196	12.4208
TOMM7 /// C4orf46	12.4167	12.4318	12.4046	12.1277	12.144	12.1327	12.5625
REG1A	4.93777	5.15606	5.21391	5.02171	5.34353	5.11226	5.20906
CDKN1A	9.36026	9.37933	9.3323	10.3155	10.2918	10.3021	10.3126
FKBP1A	9.89179	9.93013	9.68391	9.57909	9.57397	9.5725	9.1419
MTCH1	10.8762	10.8916	10.9772	10.8688	10.8534	10.7744	11.0333
C3	8.89621	8.97983	8.88303	9.49248	9.59735	9.5025	9.2954
CD81	11.4821	11.5278	11.4589	11.5445	11.5269	11.5691	11.462
TXNDC5 /// BLOC1S5-TXNDC5	11.5906	11.5443	11.5528	11.5297	11.5317	11.5551	11.5222
MAGED2	9.31944	9.35036	9.17219	9.05202	9.003	9.08297	9.51582
APEX1	11.4952	11.5373	11.4917	11.4544	11.4255	11.4633	11.5292
SLC25A5	13.4278	13.4575	13.3869	13.2601	13.2838	13.2687	13.3579
COL6A1	5.75157	5.40514	5.53808	5.78466	5.90232	5.81059	5.45211
PSMB4	11.7399	11.7109	11.5371	11.5749	11.5599	11.5288	11.8387
PRDX2	5.49907	5.23403	5.39916	5.60593	5.28466	5.42885	5.9316
EPAS1	11.2629	11.3393	11.2728	10.3529	10.359	10.3846	9.94067
TSC22D1	11.564	11.5604	11.7841	11.2863	11.2437	11.3114	11.284
COL3A1	2.85291	2.89497	2.85291	2.94211	2.59386	2.80952	2.33713
DDB1	10.6479	10.7399	10.6071	10.6615	10.6772	10.6269	10.3214
SKP1 /// SKP1P2	11.4115	11.4363	11.5795	11.3735	11.2984	11.3595	11.6649
SKP1	10.8236	10.9083	11.0592	10.8178	10.7532	10.8144	10.712
LY6E	8.88796	8.85433	8.68354	8.57538	8.54484	8.55591	8.36991
CCT2	11.7597	11.7501	11.7924	11.501	11.4577	11.4963	11.6934
BCAP31	11.9764	11.99	11.9276	12.0723	12.0424	11.9898	11.7035
FLNA	10.8785	10.88	10.8036	10.5654	10.5355	10.4709	10.8714
SNU13	10.8686	10.7647	10.7054	10.4812	10.4767	10.4969	10.1735
ARF4	10.8598	10.8063	10.7665	10.4246	10.4254	10.4032	10.0184
AKR1B1	13.8575	13.8424	13.7865	13.8782	13.8592	13.8675	13.977
TMBIM1	8.27842	8.2324	8.17566	8.48511	8.5093	8.43764	8.22762
RBBP7	11.0346	10.9466	11.0064	10.8745	10.7734	10.8853	10.6617
PDIA6	11.4779	11.5039	11.4456	11.4395	11.4718	11.426	11.0303
TIMP3	3.12206	3.14649	3.07382	3.33116	3.34917	3.30238	3.7979
DAP	9.68668	9.71654	9.62171	9.06502	9.09913	9.06194	9.38609
CTGF	7.45987	7.43176	7.37862	7.46316	7.44739	7.53223	7.76585
CPB1	5.30599	5.16966	5.64371	5.70399	5.52987	5.79233	5.63241
DNAJB1	10.0038	10.0611	9.9256	9.75875	9.79878	9.71509	9.52402
TALDO1	12.411	12.424	12.3556	12.2992	12.2835	12.2737	11.9454
ERGIC3	10.9073	10.9087	10.7807	10.9553	10.9732	10.9526	11.2074
RPL10	5.62664	5.71069	5.51487	5.90416	5.80643	5.97016	5.86166
COL4A2	7.78612	7.79747	7.58804	8.21536	8.23094	8.29857	8.36021
KISS1	5.69129	5.46901	5.60101	5.78913	5.76074	5.78349	5.64749
SSR2	10.7818	10.8387	10.6555	10.6828	10.6633	10.6287	10.8296
COX8A	13.0784	13.056	12.9571	12.8467	12.849	12.8615	13.2681
DHCR24	8.90717	8.93362	8.94429	8.92864	8.93906	8.91621	8.45417
LYZ	3.32547	3.19183	3.22532	3.28174	3.13059	3.35271	3.67105
IGFBP4	9.41796	9.43372	9.38253	8.49436	8.45203	8.39554	8.48244
ARHGDIB	4.93928	4.88361	4.98831	5.00853	4.8413	4.90953	4.86275
TUFM	11.7996	11.7846	11.632	11.8071	11.8228	11.8192	11.3811
TXN	13.6769	13.6357	13.782	13.7894	13.72	13.7544	13.5924
SRPRA	7.87169	7.80108	7.68491	7.60938	7.73779	7.7842	7.33936
DDX17	7.40884	7.45326	7.19769	6.63682	6.77393	6.70978	6.32458
TFRC	11.4909	11.4674	11.4777	10.6289	10.611	10.6826	10.4141
GABARAP	11.8973	11.9166	11.9127	12.0879	12.0812	12.0546	12.2263
SST	3.23683	3.1661	3.30016	3.31345	3.26274	3.44662	3.10695
MCL1	9.72859	9.78183	9.90547	9.83352	9.81576	9.88019	9.7082
PGRMC1	12.4782	12.4939	12.4905	12.421	12.4439	12.4569	12.6668
AMY1A /// AMY1B /// AMY1C /// AMY2A /// AMY2B /// AMYP1	5.05187	5.16813	5.07551	5.24742	5.11942	4.97354	4.7654
FSCN1	9.43079	9.46819	9.32359	9.51462	9.51275	9.5287	9.10015
MORF4L1	12.9753	12.9857	13.0413	13.1528	13.1669	13.1635	12.8908
CYR61	9.14647	9.14112	9.13825	10.1609	10.1002	10.1308	9.97123
HBG1 /// HBG2	3.20417	2.91923	2.80552	2.80529	3.00028	2.97435	2.84142
CTSK	6.48065	6.57868	6.44601	6.24858	6.10367	6.26462	6.51498
OXA1L	11.0754	11.1166	10.9817	11.144	11.1393	11.1706	11.0365
IGFBP7	11.1473	11.135	11.3123	11.3701	11.3262	11.4146	11.7613
RPL18A	13.4566	13.4561	13.4325	13.4955	13.4866	13.4674	13.0933
LASP1	10.8792	10.9839	10.9668	10.8715	10.829	10.8867	10.8581
IARS	12.0874	12.0635	12.0888	11.68	11.6637	11.7739	11.3471
MAGED1	10.8471	10.8967	10.7363	10.5505	10.5654	10.6093	10.5798
MFGE8	8.89121	8.71651	8.77924	8.89448	9.00309	8.93861	8.89809
NDFIP1	8.56156	8.53711	8.62402	8.55721	8.5717	8.53414	8.87093
HERPUD1	9.65069	9.70436	9.73609	9.50976	9.49215	9.55845	9.02798
PSMD3	10.7031	10.6315	10.5251	10.3833	10.4369	10.4812	10.421
SLC25A39	10.5947	10.555	10.4458	10.5031	10.4913	10.497	10.2536
MLEC	9.21967	9.27098	9.19273	9.42962	9.36264	9.36496	9.01544
HADHA	10.3368	10.3565	10.4139	10.3975	10.4053	10.4168	9.93484
COTL1	12.1794	12.1451	12.1646	12.2388	12.2052	12.2403	11.8995
CCT6A	11.4636	11.3963	11.4434	11.3276	11.2677	11.347	11.6591
IFNGR2	9.28356	9.28733	9.25473	9.19204	9.24268	9.17983	8.87113
LRP1	7.48016	7.44398	7.42044	7.61406	7.60912	7.7905	7.46836
GPS1	9.87031	9.88296	9.66676	7.95891	7.69095	7.65063	8.16962
IDH2	8.34646	8.42916	8.16838	8.46822	8.4356	8.41475	7.96098
RPLP1	14.2036	14.1829	14.205	14.1465	14.1442	14.1629	13.8615
RPS14	13.8879	13.8794	13.8621	13.9458	13.946	13.9225	14.2766
THY1	6.45761	6.40611	6.43518	6.27498	6.45394	6.39544	6.41237
RPS8	13.2541	13.2684	13.2928	13.3411	13.3185	13.3505	12.8894
TMED10	10.6554	10.6254	10.4345	10.6374	10.5952	10.6216	10.9185
CBX1	10.5131	10.5584	10.5228	10.1359	10.1524	10.2189	9.84805
TMEM109	9.46945	9.42093	9.31765	9.15897	9.16276	9.16459	9.65487
DAG1	7.05039	7.25252	7.11639	6.83767	6.94552	6.66948	6.98736
GAS6	6.1498	6.38431	6.02718	6.23871	6.15708	5.92003	6.37575
IMMT	11.5463	11.5452	11.5266	11.5333	11.5369	11.5663	11.1958
CYB5R3	8.03054	8.0128	7.92112	7.41223	7.51406	7.57333	7.49579
QSOX1	8.73457	8.73174	8.76131	8.93784	8.93275	8.82443	9.18378
QSOX1 /// FLJ23867	6.4275	6.46116	6.33243	6.68486	6.65337	6.6262	6.65439
TMEM59	8.94461	8.93369	8.8822	9.05352	8.98333	9.03787	9.02647
YWHAQ	11.7778	11.7994	11.9104	11.9087	11.844	11.8393	11.6616
PGA5 /// PGA3 /// PGA4	3.92307	3.74939	3.8503	3.89912	3.94809	3.9921	3.88201
SCD	9.99793	9.98512	9.9505	9.69154	9.62913	9.71544	9.21819
H1FX	10.5556	10.5439	10.48	9.7919	9.83009	9.79502	9.48668
PSMD2	9.59441	9.63497	9.64185	9.38793	9.32441	9.36803	9.33483
COPZ1	11.1491	11.1689	11.0839	11.0031	11.0072	11.027	11.0114
CD9	10.7303	10.744	10.6647	10.3608	10.3675	10.3546	10.5834
CLSTN1	7.67799	7.5425	7.46446	7.134	7.16872	7.16574	6.74526
KDELR2	10.924	10.9233	10.8916	9.46922	9.55807	9.55531	9.4096
PPM1G	10.6131	10.6116	10.516	10.4973	10.4605	10.4787	10.9024
RAC1	6.33286	6.31791	6.32129	5.48592	5.55918	5.48592	5.93676
VKORC1	10.1515	10.1985	10.1108	10.1802	10.2152	10.1909	10.3088
TBCB	12.099	12.1269	12.0297	12.1283	12.1144	12.0941	12.0435
SF3B2	9.7836	9.76894	9.67823	9.49744	9.48427	9.49252	9.66158
HLA-DPA1	6.88163	6.75407	6.77813	6.99916	7.02093	7.07555	7.146
CAV1	12.5982	12.5879	12.5388	12.8463	12.8477	12.8817	13.2821
PMP22	10.0929	10.1029	10.0752	8.6945	8.55134	8.56556	8.44924
MAPRE1	10.3668	10.3252	10.3176	9.24218	9.228	9.19314	8.84417
MYL9	7.65727	7.7233	7.73479	7.88892	7.97477	7.99168	8.2005
DYNC1H1	8.66294	8.59841	8.61029	8.49249	8.49697	8.51126	8.93219
YWHAH	10.721	10.788	10.825	10.9845	10.9932	10.9558	10.646
RBM38	7.98834	7.73671	7.68219	7.39119	7.26152	7.45394	7.40631
PSMB7	11.1426	11.13	11.0901	10.7058	10.6898	10.7175	10.2982
TFG	10.5833	10.6664	10.6264	10.7051	10.6741	10.6783	10.6088
PPP1R11	9.00379	9.05989	8.97079	9.03789	8.98419	8.91865	8.73022
SPARC	5.9099	5.95114	5.73587	6.8556	6.79604	6.70391	7.29663
SF3B5	11.2261	11.2782	11.2184	11.1201	11.1118	11.0701	10.8314
PPIB	12.3123	12.3488	12.2884	12.0161	12.0393	12.0134	12.2292
ATP6V1H	8.77073	8.85705	8.77138	9.15718	9.09792	9.11565	8.96863
ARPC1A	10.8091	10.8398	10.7823	10.8209	10.8166	10.7978	10.8113
PLOD1	8.26102	8.37086	8.23719	8.13541	8.04974	8.04872	7.90285
TMX2	10.7118	10.7267	10.6959	10.9512	10.9621	10.9744	10.6702
BTG2	6.01005	5.95106	5.81248	7.06755	6.91197	6.88582	7.1974
NDUFAB1	11.9155	11.9358	11.8624	11.3497	11.3341	11.3907	11.6378
RNF130	9.33049	9.28145	9.34804	9.03445	8.99535	9.04618	9.35956
SDF4	9.11137	9.10346	9.01857	9.2571	9.27653	9.22641	8.78958
CRYAB	6.48094	6.60425	6.70982	6.79322	6.90038	6.69163	6.71421
UFC1	10.1517	10.2612	10.1935	10.2515	10.2398	10.2802	9.8986
RNF114	8.21963	8.28603	8.06575	8.18467	8.24354	8.18178	7.99598
SH3BGRL	9.74874	9.80295	9.80606	10.0819	10.0878	10.2086	9.86985
ALDH2	9.7632	9.85795	9.78306	9.69368	9.65812	9.69076	10.0339
FGB	5.01144	5.27988	5.16109	4.25472	4.08642	4.12101	4.03684
LAPTM4A	11.0532	11.0622	11.2349	11.2177	11.2266	11.3299	11.5348
MAF1	9.49553	9.52772	9.48521	9.4286	9.41362	9.40898	9.6345
TMEM14C	11.5599	11.5154	11.6568	12.1296	12.0817	12.2172	11.6763
SERPINE1	8.7849	8.82536	8.734	9.41389	9.42362	9.32199	9.3592
UGP2	11.3384	11.3571	11.3227	11.1975	11.1936	11.2031	11.58
LPCAT1	9.48746	9.53475	9.44876	9.60668	9.59952	9.59914	9.32602
TTC3	8.98378	9.06441	9.02753	9.65952	9.67131	9.57038	9.54712
ATP6AP2	10.4331	10.4826	10.461	10.7658	10.7012	10.7691	10.9159
ADIPOR1	9.44403	9.4086	9.49255	8.83065	8.87024	8.84117	8.90659
TXNRD1	12.8744	12.8648	12.8883	12.8279	12.8335	12.8351	12.3828
FSTL1	9.46073	9.43174	9.38109	9.67243	9.72643	9.72463	9.87795
PCOLCE	6.17747	6.26084	6.01085	6.26912	6.32126	6.30386	6.52689
RTFDC1	9.11888	9.14584	9.12795	9.08683	9.06933	9.06844	9.2787
VDAC1	11.9069	11.9786	12.0671	12.1695	12.0957	12.1258	12.3294
COX5A	12.8463	12.8587	12.7793	12.5937	12.6214	12.606	12.9705
GLB1	10.0936	10.0547	10.0142	10.3399	10.3363	10.3304	10.4553
SLC39A1	9.67721	9.7429	9.61173	9.6325	9.60593	9.70435	9.32624
ERRFI1	10.0304	10.0519	10.0085	9.27913	9.28481	9.34256	9.3408
RPN2	11.624	11.6963	11.6129	11.5893	11.5515	11.5966	11.1532
UBE2V1 /// TMEM189-UBE2V1	9.68633	9.72343	9.70943	10.0847	9.94145	10.0198	9.55889
PSMB8	8.88983	8.88661	8.72534	9.35787	9.36375	9.29981	9.21213
TPM3	6.61577	6.79739	6.86414	6.94072	6.80758	6.77258	6.52827
PSMA5	11.4641	11.478	11.4142	11.486	11.5008	11.4907	11.0329
DCTN1	8.07304	8.0556	8.0556	7.81565	7.80729	7.70091	7.47152
IFITM1	6.24149	5.83557	5.95939	6.08413	6.11084	6.21079	6.02723
WDR83OS	11.099	11.0976	10.949	10.9057	10.8925	10.9381	10.7099
JUNB	7.90204	7.89745	7.75813	8.10005	8.07395	8.18541	8.35725
CCNG1	10.2255	10.2072	10.435	11.5542	11.4006	11.6025	11.3289
NCSTN	9.03623	9.09755	8.89066	9.66005	9.67684	9.7016	9.41898
NAP1L4	10.7716	10.8128	10.7101	10.716	10.7479	10.6848	10.4255
PRNP	11.845	11.8566	11.9644	11.8982	11.8377	11.9342	12.2284
C12orf57	11.5181	11.5449	11.4824	11.1666	11.1963	11.1618	11.4123
CREG1	10.306	10.3413	10.3496	10.5667	10.515	10.6832	11.0312
KRT7	13.0922	13.1278	13.062	12.7633	12.7872	12.7668	12.6907
PPA1	12.2336	12.2516	12.2304	12.2246	12.2205	12.2335	12.677
ARPC5	12.0284	12.0229	12.0855	11.813	11.7629	11.87	11.8986
CTRB2	4.24903	4.08413	4.1949	4.3753	4.36347	4.49077	4.52872
CD164	9.19313	9.32013	9.18812	9.11804	9.16014	9.14448	9.27157
ZFP36	9.14366	9.22407	9.14507	10.219	10.192	10.2828	10.22
CIRBP	10.1711	10.2324	10.0678	9.7673	9.89678	9.82032	10.048
COX7B	12.5906	12.5858	12.6089	12.6108	12.6277	12.6362	12.4951
NOLC1	8.63493	8.70394	8.57165	8.6435	8.69474	8.68279	8.93039
SEC16A	9.90869	9.92456	9.94	9.82755	9.85142	9.87082	9.62006
WDR6	8.97025	8.98163	8.83325	8.78977	8.74755	8.77917	8.75862
PFN2	11.4253	11.4559	11.4795	11.4787	11.4962	11.5266	11.5971
ITGA5	6.38548	6.33739	6.058	6.49267	6.55066	6.62956	6.12746
MGEA5	8.74663	8.77059	8.74657	8.88423	8.95392	8.94352	9.37161
MB	7.89517	7.91949	7.88792	7.86911	7.92964	7.85523	7.9582
CTSC	10.2214	10.2555	10.2121	10.3216	10.321	10.3064	9.93215
AKR1C3	13.7626	13.7569	13.7667	13.537	13.511	13.539	13.6246
NRDC	10.1027	10.1353	10.0801	9.6652	9.59649	9.67612	9.56242
VOPP1	8.62711	8.59253	8.54428	8.52518	8.44314	8.49129	8.35528
MSN	10.4315	10.4402	10.4344	10.3963	10.3677	10.5242	10.8649
ZNHIT1	10.3583	10.3777	10.2566	10.3113	10.3449	10.3514	10.0844
CDC37	10.025	10.1153	9.96808	10.1839	10.2192	10.1847	10.5685
C1orf43	12.1629	12.1185	12.0708	11.5614	11.5753	11.59	11.3792
GOLM1	8.40401	8.36373	8.3566	8.55449	8.3826	8.56953	8.30787
ITM2B	10.4094	10.4886	10.6603	10.8528	10.8178	10.8977	11.0539
OAZ2	9.31298	9.32283	9.27641	9.15105	9.21754	9.22511	9.23149
ITGB1	11.8337	11.8305	11.8505	11.9112	11.9067	11.8829	11.458
CYP19A1	3.21643	3.33308	3.48868	3.49584	3.569	3.42299	3.95992
PSMB3	12.0377	12.0956	11.9946	12.0487	12.0467	12.0439	11.7192
NIPSNAP1	9.44469	9.44083	9.48111	9.30997	9.14536	9.34804	9.0321
TMEM123	9.7096	9.73895	9.71745	10.209	10.1811	10.2129	10.0567
CASC3	8.35532	8.36901	8.21357	7.70286	7.58197	7.63613	7.71312
PLPP3	8.11687	8.10244	8.03439	7.79183	7.80963	7.79617	7.51018
RCC2	7.87729	7.80984	7.76527	7.75801	7.64716	7.68079	7.41145
ATP5J	11.0965	11.1286	11.1192	10.5904	10.5174	10.6263	10.0608
KIAA1191	10.8033	10.8588	10.8015	10.7581	10.7285	10.7418	11.0471
NBL1 /// MINOS1-NBL1	7.31971	7.2845	7.20693	7.28502	7.18859	7.06451	7.01802
SSRP1	10.7688	10.8042	10.6675	10.1807	10.2088	10.1315	10.2825
DPYSL3	6.96979	7.10824	7.0379	6.52179	6.59933	6.64029	6.78943
TSPAN7	5.60041	5.42833	5.42833	5.54727	5.52553	5.67476	6.03098
PRL	4.57766	4.60067	4.4117	4.72434	4.78408	4.61749	5.21975
ATIC	11.1108	11.0127	10.9347	11.0645	11.0789	11.0875	11.0489
UBL5	10.794	10.7675	10.7584	10.8035	10.709	10.7454	10.3196
RGS2	8.38296	8.39373	8.39267	8.22571	8.26733	8.22486	7.85859
TTC1	10.0607	10.202	10.1144	10.1912	10.2134	10.1729	10.3779
RPL36AL	11.574	11.683	11.6008	11.6402	11.6534	11.6445	12.0934
TBC1D14	9.53979	9.58801	9.58427	9.68604	9.71477	9.6837	9.25929
AP1M1	9.3247	9.30283	9.14322	9.28636	9.30635	9.28311	9.08534
PODXL	8.54665	8.6469	8.58243	9.1116	9.01427	9.14895	9.03485
DUSP1	8.37625	8.41798	8.30203	8.5814	8.72902	8.60923	8.93213
ACAA2	9.10618	9.14205	8.96018	8.76552	8.80829	8.90575	8.91506
SIRT2	7.99544	7.94383	7.87324	7.6917	7.63095	7.59728	7.16647
SET	12.1933	12.1932	12.1791	11.8433	11.8724	11.8936	12.1982
MRPL13	9.84409	9.99274	9.91193	9.64004	9.6244	9.69289	9.2876
IMP3	10.3969	10.3952	10.2675	10.3688	10.4114	10.3815	10.395
HSPB8	6.83504	6.92188	6.7094	7.91186	7.86961	7.91851	7.68496
MTPN /// LUZP6	11.2384	11.2567	11.2584	11.2106	11.1873	11.2367	10.9975
HNRNPH2 /// RPL36A-HNRNPH2	10.0078	9.92829	10.199	10.7358	10.6069	10.7567	10.8782
PRR4	6.92433	6.79025	6.87146	7.17182	7.20664	7.16909	7.43247
CRYBB2	6.42277	6.30353	6.37389	6.54626	6.47104	6.55406	6.3448
PLOD3	8.09342	8.12466	7.96521	7.74712	7.81102	7.80165	7.97661
ATP6V0C	10.5798	10.576	10.5718	10.5047	10.4769	10.4764	10.4421
SLC40A1	5.25485	5.73946	5.52309	6.21967	6.3581	6.18758	6.74884
MRPL37	10.5299	10.4866	10.372	10.0182	10.0554	9.99859	10.2633
TUBG1	11.4475	11.5079	11.3444	10.1902	10.2018	10.1847	9.90698
STOM	9.10148	9.03931	8.98522	9.88548	9.8728	9.863	9.89331
ACTG2	3.20417	3.07057	3.17696	2.9783	2.9763	3.06995	2.92411
MANF	10.8748	10.8901	10.788	10.5783	10.5814	10.6063	10.5327
LUM	3.01353	2.82563	2.70762	2.849	2.84187	2.86464	2.48279
WDR45B	9.37591	9.32734	9.28978	8.93737	8.94337	8.99936	8.88628
PRRC2B	9.38961	9.33471	9.4727	8.41157	8.37451	8.54351	8.54497
ANXA6	7.85419	7.81742	7.67213	8.1419	8.1347	8.09977	8.61019
PPP2CA	8.32998	8.16791	8.51193	7.48482	7.49334	7.59034	7.1295
SEPW1	9.34459	9.39486	9.304	8.64533	8.65018	8.50829	9.0321
STARD10	7.31329	7.32369	7.20253	7.28848	7.2704	7.29469	7.62412
PYGB	9.5289	9.60793	9.51929	9.23314	9.37187	9.24602	9.78647
TRIP12	9.34526	9.35303	9.31606	9.30745	9.29026	9.30683	9.4889
MLLT6	6.98768	6.89229	6.85266	7.04576	6.95844	7.05272	7.12921
HIGD1A	5.48995	5.54688	5.58266	5.46259	5.46131	5.4308	5.47503
TRAP1	11.1193	11.1196	10.9753	10.8867	10.8607	10.8934	11.1671
PSMC3	11.2877	11.2519	11.1055	10.8873	10.8947	10.9616	10.4628
ZFP36L2	7.23437	7.42219	7.1593	7.17285	7.10211	7.01668	7.55039
LRPAP1	9.83026	9.88997	9.67567	9.86641	9.86828	9.83512	9.75393
BUD31	11.0409	11.0171	11.0231	10.5452	10.4454	10.508	10.9444
SYPL1	10.4209	10.4777	10.4303	10.7394	10.7067	10.6925	10.6564
NOP10	11.9035	11.9312	11.922	11.9679	11.9451	11.985	11.7336
PRMT1	12.193	12.1794	12.1061	12.0244	12.0411	12.0424	12.2928
HMG20B	8.85631	8.94622	8.75252	8.94337	8.96404	8.97301	9.38183
M6PR	10.3369	10.3769	10.2703	10.6188	10.6984	10.5644	10.2068
PLS3	11.2366	11.3094	11.2006	11.1275	11.1191	11.1318	11.2658
SURF4	10.7798	10.7655	10.6946	10.7267	10.7526	10.6939	11.1703
RUVBL1	10.4017	10.37	10.3454	10.4198	10.3352	10.4063	10.5493
PSMA3	11.237	11.2725	11.304	11.0324	11.022	11.0745	11.0078
HEXB	10.5441	10.5822	10.6101	11.0531	11.0106	11.0501	11.0343
NEU1	8.27762	8.31519	8.25822	8.48229	8.50108	8.49809	8.57694
SDHC	6.91665	6.8801	6.83219	6.82602	6.75575	6.9016	6.32458
MAPK1	5.93128	5.9099	5.89446	5.70242	5.82186	5.66932	5.59687
PTPRF	9.94886	9.94001	9.86952	9.86115	9.84428	9.87681	10.2158
EFEMP1	7.49579	7.62544	7.58598	5.96821	6.19063	6.19063	5.58888
PLAT	4.22479	4.83314	4.64819	6.12153	6.14987	6.13976	6.26497
ATP5G2	11.8144	11.8629	11.7667	11.8928	11.893	11.8808	11.9844
DDX47 /// APOLD1	10.3126	10.3622	10.2823	10.4281	10.4031	10.4203	10.4598
C6orf48	10.4543	10.474	10.378	10.9637	10.9768	10.957	10.7596
CLU	4.22445	4.38953	4.46885	4.42911	4.40187	4.51791	4.39913
PDGFRB	3.46742	3.32265	3.27691	3.49999	3.45637	3.34946	3.12564
PRCP	8.54414	8.45627	8.45056	8.82789	8.78444	8.91833	8.64896
NCKAP1	9.68548	9.71379	9.62715	9.38613	9.38421	9.37818	9.29362
RIC8A	8.45663	8.56039	8.39902	8.22413	8.26077	8.22771	8.00901
ACTN4	10.8895	10.905	10.8013	10.7631	10.7564	10.7714	10.3171
CDIPT	8.90591	8.93102	8.79795	8.59935	8.5908	8.59745	8.64664
DDAH2	8.14275	8.26494	8.02537	7.73321	7.7464	7.70547	7.76304
HACD3	11.4169	11.41	11.334	11.4153	11.4112	11.4401	10.9749
ATP6V1F	10.8161	10.785	10.6756	10.6752	10.671	10.736	10.3242
MRPL41	9.83068	9.91553	9.82056	9.52225	9.48655	9.49991	9.67692
TINF2	8.55434	8.525	8.48648	8.4941	8.51998	8.46503	8.02075
UFD1L	10.2213	10.154	10.0883	10.0566	10.0601	10.0555	10.4424
ZFAND3	8.00973	8.04575	7.95778	8.28632	8.2578	8.2022	7.9724
OLFML3	8.89848	8.9503	8.91064	9.7381	9.71761	9.79562	9.24824
ATP5H	11.5499	11.5342	11.4694	11.5365	11.5197	11.5786	11.625
COMMD7	10.4559	10.5489	10.4509	10.3009	10.253	10.3142	9.9144
TAX1BP3 /// P2RX5-TAX1BP3	11.5616	11.523	11.412	11.1184	11.0951	11.1182	11.0893
CDK2AP1	11.9811	12.0071	12.0226	11.662	11.6387	11.6682	11.9194
PITPNA	7.87169	7.87662	7.87509	7.55299	7.53754	7.6781	7.20411
DAP3	10.3635	10.4406	10.2772	10.4443	10.472	10.4381	10.05
TMEM248	10.3889	10.4051	10.2974	10.2837	10.2644	10.2589	10.116
PIP4K2B	6.47845	6.41996	6.31817	6.03618	6.06954	5.94852	5.56172
ATP5I	11.6744	11.709	11.7627	11.767	11.7001	11.7274	11.9222
PNLIP	3.15787	3.36579	3.25913	3.18952	3.19473	3.25002	3.47976
PYCR2	9.56528	9.48601	9.64794	9.27059	9.22556	9.27868	9.29611
IFI27	6.05792	5.95688	6.08392	5.97629	5.9738	5.83185	5.76401
NGRN	11.7285	11.7161	11.6977	11.6859	11.6893	11.6873	11.746
SCARB2	6.46864	6.39755	6.67557	6.59217	6.45317	6.5142	6.58462
TNIP1	7.45928	7.45915	7.30423	7.84339	7.8329	7.80435	8.28592
SUCLG1	8.92525	9.00223	9.06502	8.66284	8.62372	8.70839	9.13233
COASY	9.41203	9.45701	9.2616	9.01184	8.98618	8.94946	9.46665
PSMC2	10.9187	10.9489	10.9428	11.083	11.052	11.0418	11.5325
DDX23	9.82125	9.9053	9.75596	9.69461	9.71831	9.75746	9.78955
DDX3X	12.1809	12.1695	12.2281	12.0402	11.9966	12.0322	11.7742
FAM96B	10.0922	10.096	9.97717	10.1241	10.0948	10.0975	9.73203
MYO6	7.60968	7.71418	7.69925	7.60078	7.61228	7.64103	7.38139
EFNB1	4.89606	4.96089	4.91618	4.90084	4.93631	4.89869	4.69985
CD44	9.57065	9.57	9.50572	10.2399	10.2599	10.2413	10.6125
CD24	12.8114	12.8105	12.7729	12.4901	12.4717	12.5057	12.278
SH3BGRL3	9.29464	9.32076	9.16301	9.64705	9.64795	9.66763	9.57236
PGRMC2	10.302	10.3429	10.2005	10.1024	10.0801	10.0897	9.59346
2009-09-01	10.8528	10.8732	10.7477	10.7735	10.7853	10.729	10.9759
GSS	8.94892	8.90408	8.82994	8.72679	8.69269	8.71703	8.22249
TRAM1	10.6371	10.5454	10.6968	10.8424	10.8192	10.8732	11.0459
PLEC	11.2276	11.3004	11.1732	11.0702	11.0614	11.087	10.7452
SH3GL1	8.80169	8.82712	8.79432	8.81808	8.82326	8.7845	8.48888
SDHAF2	9.8623	9.86326	9.79957	10.0762	10.0822	10.0204	9.71182
SGK1	8.27122	8.41456	8.24222	8.24037	8.22817	8.16854	7.78085
TUBB6	11.2109	11.1611	11.1549	10.9659	10.9888	11.0455	11.3537
PPP1R7	8.44162	8.41014	8.29047	8.18962	8.18036	8.13853	7.94489
TAGLN	7.0406	6.73876	6.83222	6.59979	6.6447	6.68917	6.71215
NBEAL2	6.7641	6.66522	6.47766	6.53882	6.66751	6.57519	6.1388
AQP1	5.10121	4.86617	4.81919	4.86249	4.96264	4.91149	5.02826
PSMB1	12.3558	12.3099	12.3133	12.3351	12.3073	12.3403	12.0293
TSG101	10.3366	10.3772	10.2931	10.4925	10.5029	10.4703	10.8187
RALB	7.98466	7.91455	8.01943	6.3749	6.34072	6.40615	6.13503
KCTD12	6.03248	6.00041	6.07309	5.90739	5.91788	5.88605	5.85978
MBTPS1	8.9743	8.99907	9.0112	8.96811	8.96311	8.98827	8.61736
CNDP2	8.91529	8.90382	8.78832	8.61578	8.67102	8.59277	8.18982
ARL6IP5	10.4972	10.4344	10.3598	10.3611	10.3587	10.3874	10.4462
PEPD	9.69806	9.69396	9.57666	9.76313	9.71301	9.62381	9.30528
RPL7	12.4703	12.568	12.6993	12.7327	12.6724	12.676	12.3292
SREBF1	9.85021	9.86794	9.70727	9.34496	9.47557	9.31135	9.28857
NCBP2	8.31325	8.37757	8.36712	8.27828	8.28146	8.33708	7.92644
ACTR10	9.66721	9.6952	9.68736	9.7702	9.76038	9.81665	9.43744
SPTAN1	6.23407	6.35975	6.06919	5.88007	5.76269	5.8146	5.82597
ST14	5.28136	4.86582	4.89408	5.26441	5.16039	5.15911	4.77454
ABHD17A	9.72993	9.74955	9.66924	9.54853	9.64008	9.62957	9.36676
NEDD8	12.3412	12.3421	12.3318	12.211	12.2079	12.2575	12.4615
NEDD8 /// LOC100128775	11.8523	11.8893	11.8632	11.7461	11.724	11.7317	11.9236
EPRS	10.4314	10.4638	10.4415	10.1956	10.17	10.2625	9.83418
PFKP	11.6566	11.6582	11.6238	12.0348	12.0308	12.0063	11.764
SMOC2	3.71702	3.59499	3.56765	3.56115	3.44341	3.59079	3.36826
MTFR1L	7.20099	7.33634	7.237	6.76243	7.07969	6.98514	7.28024
VGLL4	7.8098	7.95976	7.92465	7.11251	7.11806	7.05619	7.60114
BRK1	10.1176	10.1434	10.2632	10.2588	10.2204	10.2169	10.0275
AIP	8.80516	8.84593	8.7266	8.59554	8.58856	8.63247	9.07956
VPS11	6.86611	6.91736	6.71368	6.83461	6.77413	6.8003	7.17829
DUS1L	9.23312	9.14406	9.06776	8.8902	8.88608	8.82794	8.5015
ADNP	10.0625	10.1333	10.0852	9.83297	9.93249	9.96503	9.69312
HTN3	3.67507	3.51708	3.78289	3.58772	3.90246	3.69503	3.60158
YPEL5	8.69955	8.85336	8.95998	9.24409	9.17644	9.33964	9.34224
GH1	4.73833	4.93787	4.78353	5.50478	5.2624	5.43492	5.12118
ATP5G1	11.3062	11.4058	11.3922	11.5725	11.5102	11.5805	11.4981
COX7A2L	10.7938	10.8295	10.7857	11.0269	11.0134	11.0046	11.3703
MCM2	9.15154	9.23797	9.13044	8.395	8.37633	8.30612	8.17858
SPG7	9.46806	9.40143	9.35123	9.60041	9.57149	9.50444	9.91469
ID2	9.72876	9.79263	9.92891	11.0943	11.0666	11.124	11.4478
MRPL16	10.2223	10.1195	10.0345	10.0041	9.97484	10.0317	10.2083
NOSIP	10.1875	10.2063	10.0338	10.2021	10.238	10.1856	10.1688
NDUFC1	11.5593	11.6045	11.5382	11.4073	11.4612	11.3747	11.0545
CAB39	9.4891	9.46259	9.4158	9.49744	9.5297	9.48814	9.18183
FAF2	7.5859	7.55427	7.51879	7.81229	7.79625	7.82713	8.00401
HYOU1	6.71831	6.91919	6.70101	6.48488	6.48968	6.23123	6.72006
RBM5	9.02459	9.08823	8.95856	9.08563	9.11787	9.06344	9.44685
DYNC1LI2	9.4834	9.38829	9.37356	9.1471	9.17177	9.10308	9.49298
TNFAIP1	8.10494	8.15708	8.0367	8.22077	8.19795	8.24064	7.90191
TMEM258	11.5491	11.5537	11.4934	11.4435	11.4369	11.4396	10.9522
SERPINF1	4.29473	4.4776	4.46114	5.2172	5.22763	5.35573	5.03702
CMTM3	9.42262	9.38667	9.31127	9.43408	9.40335	9.42397	9.22359
MAL2	4.19645	4.26949	4.20776	4.28686	4.29534	4.26358	4.76915
RAB31	7.97774	8.07117	7.94579	7.66683	7.69434	7.66282	7.51435
RAD23A	9.56268	9.5793	9.46899	9.31057	9.29801	9.37153	9.303
ADRBK1	5.7987	5.66297	5.52276	5.31094	5.49088	5.27223	5.58749
GOLGA7	8.78751	8.81018	8.71043	8.7865	8.83128	8.80499	8.48691
SELT	10.9319	10.8588	10.9482	10.867	10.8045	10.9397	10.9611
NDUFB9	11.8939	11.9821	12.0184	12.0961	12.0627	12.0642	11.7964
SLPI	7.66227	7.58332	7.54013	6.8573	6.82256	6.99684	6.58017
BST2	2.94858	2.79472	2.87357	3.08833	2.82977	2.95782	3.23251
GPAA1	9.78186	9.75577	9.64669	9.71856	9.72158	9.65631	9.56794
SLC25A29	7.35747	7.30658	7.17925	7.12883	7.11979	7.12957	7.1273
BABAM1	9.64321	9.70302	9.55403	9.48195	9.45628	9.42219	9.35486
PPP2CB	10.5522	10.5256	10.7701	11.0999	11.0638	11.1524	11.5552
FAM168B	6.70869	6.65501	6.56431	6.40586	6.47383	6.49919	5.97121
RGL2	6.89185	6.99975	6.97118	6.96354	6.97732	6.92642	6.96918
C21orf33 /// LOC102724023	9.53771	9.54134	9.50362	9.59105	9.61953	9.53098	9.24105
TRIB1	10.0061	9.99148	9.90638	11.1611	11.1661	11.1989	10.6843
GBF1	7.49781	7.54007	7.41406	7.73454	7.67859	7.73911	7.62586
LAMC1	9.03002	9.06833	9.03247	9.73808	9.68461	9.74189	9.95975
STMN3	5.94342	5.83479	5.7453	7.46998	7.49828	7.41607	7.58139
EFTUD2	5.0561	5.10617	4.84652	5.03222	5.01337	4.79657	5.33638
PRDX4	12.303	12.2832	12.2499	12.2401	12.2271	12.2541	12.5378
FAM162A	9.75927	9.82928	9.69588	9.745	9.75324	9.77698	10.0021
TNC	4.84204	5.05479	4.86174	5.13728	4.85115	4.87956	4.99905
SLC37A4	9.23151	9.21048	9.02781	8.97649	8.96855	8.97095	8.5552
VAMP2	5.52255	5.58093	5.72329	5.93485	5.8162	5.72367	6.29
DESI2	10.2128	10.2369	10.181	9.68447	9.68833	9.63382	9.26757
PIM3	9.0077	9.05381	9.1012	9.44957	9.46493	9.45749	9.41564
ATP6V1B2	10.1329	10.1192	10.1133	10.2122	10.178	10.2224	10.4225
HSBP1	9.79978	9.80374	9.92321	9.53649	9.60577	9.67559	9.1068
ELOVL5	9.16649	9.2542	9.26637	9.54604	9.54104	9.57976	9.73802
CALCOCO1	6.41438	6.65285	6.57909	6.99011	6.81606	6.88824	7.14065
WDR77	9.262	9.25835	9.1349	9.07992	9.18556	9.10258	8.74712
AHSA1	11.475	11.5423	11.4747	11.314	11.2707	11.2663	11.1995
SF3B1	11.2179	11.2318	11.1478	11.2095	11.2132	11.2806	10.9995
PXDN	7.02706	6.92477	6.93385	7.28888	7.3184	7.40572	7.4981
AKT1	9.32502	9.36466	9.28222	9.01033	9.03106	8.83539	8.62812
SNW1	9.78831	9.7823	9.83966	9.92617	9.895	9.95006	9.82539
PRG2	4.09158	3.8496	3.93476	4.03512	3.82571	3.68374	3.81325
CKS1B	10.5662	10.5962	10.6079	10.0883	10.0335	10.0536	9.93514
KLF6	8.94426	8.98217	8.91272	9.88618	9.86976	9.91969	9.82751
SGTA	7.98238	7.96434	7.74364	7.4335	7.42791	7.49606	7.32605
RAP1A	9.09012	9.27353	9.63047	9.34655	9.16821	9.36963	9.50215
ATG3	10.2616	10.3052	10.2716	10.0008	10.018	10.0052	10.4413
PCNA	12.9265	12.9197	12.9522	12.9277	12.9008	12.8992	12.8403
MPZL1	9.15077	9.05744	9.03343	9.12001	9.06084	9.0504	8.67976
TOMM22	10.5932	10.5722	10.506	9.45724	9.47719	9.51283	9.57788
XPNPEP1	8.52172	8.48784	8.42488	8.07871	8.11237	8.06843	8.39801
PIGR	3.67416	3.74486	3.73607	4.00107	4.41895	4.05825	3.71052
STAMBP	9.08467	9.14114	9.09333	9.20732	9.16023	9.31392	9.43771
POR	9.60402	9.5978	9.46806	9.49344	9.51363	9.49377	9.64161
ZFP36L1	7.90082	7.91026	7.80359	7.96338	7.97599	7.96174	7.69357
NDUFS6	11.5684	11.5544	11.501	11.4439	11.4293	11.4187	11.0711
PDIA4	10.9349	10.9952	10.894	10.8455	10.893	10.8571	10.8924
WDR34	9.86475	9.89971	9.63465	9.14745	9.10409	9.12387	9.07639
API5	10.4824	10.4853	10.5197	10.4756	10.3987	10.4699	10.0672
NAT10	8.51864	8.59883	8.61701	8.3626	8.40213	8.33432	8.23811
ZYX	7.42316	7.41079	7.4187	7.46041	7.47126	7.40195	7.31141
BAG1	8.97944	8.94412	9.10787	9.01399	8.88267	9.02049	8.50081
IGF2R	8.58488	8.46625	8.39071	9.07492	9.05404	9.08283	9.54889
FSTL3	7.41366	7.54199	7.57446	7.25374	7.19465	7.24669	7.10316
MTOR	7.01477	7.18988	7.11157	7.26454	7.25449	7.24936	7.64018
MVP	9.38675	9.38803	9.25893	9.47384	9.50185	9.49955	9.55794
COX7A2 /// TMEM30A	9.71294	9.65687	9.73946	10.1062	10.0338	10.0929	10.1584
TMEM30A	9.74868	9.79708	9.89641	9.95586	9.93991	10.0457	10.1476
SMS	11.9124	11.8627	11.8069	11.9589	11.9639	12.0627	11.5855
SIGMAR1	9.63322	9.66999	9.56295	9.37873	9.39979	9.411	9.56593
PDCD6IP	7.68854	7.69969	7.77342	7.56705	7.60373	7.58561	7.76521
PRKACA	5.04405	4.58434	4.60881	4.44044	4.1369	4.24829	4.69136
CHMP7	9.05137	9.02623	9.01601	9.43021	9.49505	9.57002	9.84207
TRAF3IP2	7.91154	8.08255	8.02292	8.08338	8.1085	8.02209	7.71364
PMEPA1	11.211	11.1922	11.1156	11.3658	11.3259	11.3372	11.3535
PAFAH1B1	10.0919	10.0866	10.0737	9.84505	9.87381	9.90287	9.84427
B4GALT1	7.96843	7.98103	7.9533	8.09099	8.24615	8.07573	7.68777
BAHD1	8.23431	8.31815	8.29596	8.66236	8.50821	8.45104	8.88381
RNF40	9.73547	9.72797	9.65565	9.52887	9.59762	9.49979	9.71361
LBH	7.26999	7.2664	7.14732	5.52	5.36533	5.49088	5.01689
CIAPIN1	10.1265	10.1802	10.3093	8.98941	8.85885	8.9025	9.14725
MGST3	11.3806	11.4096	11.3923	11.3233	11.3214	11.3996	11.4149
NUDC	11.0791	11.0362	10.9729	10.9287	10.8166	10.8522	11.1684
MX1	4.11841	3.91796	4.32245	4.37884	4.58139	4.72385	4.82046
MRFAP1L1	9.25066	9.33397	9.29757	9.12626	9.12979	9.20518	9.07317
CCDC28A	8.01472	8.12794	7.97142	7.72711	7.71785	7.67442	7.28873
LMNB2	6.69478	6.90434	6.44939	5.91434	6.18694	6.03319	5.80032
SYVN1	8.66899	8.72087	8.70202	8.80354	8.67933	8.75261	8.64584
P4HB	10.922	10.9083	10.8804	10.8676	10.9141	10.9192	10.674
METAP2	8.45047	8.46475	8.33456	8.04471	8.07032	8.12438	8.45516
C5orf15	10.042	10.013	9.98005	10.882	10.9532	10.9388	10.7876
VPS25	10.4074	10.3724	10.3897	10.3463	10.3405	10.3452	10.4845
MED15	7.75143	7.88819	7.82523	7.8668	7.87175	7.84879	7.99222
ALCAM	8.94078	9.01382	9.15641	9.1743	9.15312	9.0575	9.14919
ABCB6 /// ATG9A	8.0609	8.02998	7.9718	7.75241	7.71458	7.70559	7.66113
SEC13	11.6939	11.6589	11.5982	11.6866	11.709	11.7113	12.0823
VWA9	9.0882	9.1215	9.10283	8.84197	8.90378	8.86149	8.66608
SETD2	7.6227	7.62774	7.62904	7.45468	7.44555	7.41676	7.20291
ID1	11.2106	11.1755	11.1167	10.4697	10.4385	10.5174	10.8462
ADIPOR2	7.76759	7.70937	7.57813	7.47002	7.48883	7.58379	7.968
UBE2Q2	7.76021	7.7789	7.72601	6.72735	6.64081	6.62163	6.35476
PISD	7.27504	7.28656	7.29446	7.77922	7.7218	7.81084	8.12597
PFKM	9.42813	9.45061	9.32529	9.40573	9.42054	9.42517	9.61654
MGP	3.29308	3.20527	3.40085	3.30556	3.38736	3.29308	3.07554
ASNA1	9.82933	9.92964	9.84166	9.98633	10.0453	10.0101	9.84893
NDUFA8	11.3394	11.3452	11.3112	10.9393	10.9283	10.9396	10.6277
GLUD1	11.1269	11.112	11.097	8.65365	8.71013	8.61935	8.68255
GLUD1 /// GLUD2	10.4769	10.5351	10.4107	8.19951	8.27471	8.25066	8.30989
VPS28	9.63784	9.59625	9.50202	9.55471	9.56463	9.53433	9.15543
CITED2	7.46319	7.62324	7.40412	8.66141	8.61423	8.65278	8.35972
HIBADH	9.03509	9.12598	8.91546	8.60507	8.61592	8.56238	8.31118
PLXNB2	9.48622	9.54223	9.39303	9.83256	9.77856	9.81348	9.86775
PRPF3	8.70628	8.75711	8.59499	8.26007	8.22641	8.13567	8.24721
E2F4	9.58372	9.59319	9.5631	9.3047	9.24982	9.24469	8.86714
PRKAB1	7.16615	7.19517	6.97824	6.74752	6.57092	6.67388	6.21154
EIF2S1	9.50319	9.57871	9.6173	9.38543	9.33825	9.3765	9.17122
RNASE1	4.60652	4.63708	4.44157	4.78831	4.60399	4.56373	4.22552
SEC61G	12.4978	12.5188	12.6181	12.509	12.4569	12.5794	12.7461
CKAP5	9.43359	9.48656	9.50771	9.01414	9.04244	9.01837	9.41381
LIMA1	4.53301	4.42885	4.2506	4.28761	4.43704	4.34278	4.49532
MPDU1	10.449	10.4629	10.5148	10.2522	10.1961	10.1927	9.97708
TMEM167B	7.13995	7.34719	7.24384	7.21793	6.9898	7.10871	7.552
CTNNBIP1	6.94007	6.98636	6.94277	7.2991	7.31251	7.27263	7.26383
RAE1	9.55364	9.57083	9.58435	9.09358	8.97572	9.02501	9.1049
MGAT1	8.77342	8.70201	8.60409	8.8453	8.81427	8.78011	8.97523
ARHGAP1	8.95485	9.03415	8.95394	8.87688	8.83882	8.90418	8.88096
RAB6A /// RAB6C /// WTH3DI	9.33341	9.26135	9.49578	9.08107	8.99285	9.1045	8.80555
RAB6A	8.08857	8.03835	8.04012	7.60785	7.57865	7.55043	7.61888
PES1	9.78361	9.8209	9.80887	9.82881	9.83983	9.78852	9.81556
PPP1R16A	7.99324	8.04585	7.93246	7.75455	7.80048	7.74701	7.6431
WASF2	7.27726	7.19765	7.05664	6.77945	6.85325	6.91432	7.30479
TOP2B	11.4183	11.4785	11.4593	11.3727	11.3971	11.3463	11.1064
TMED9	10.6589	10.6727	10.506	10.3895	10.338	10.4892	10.2629
RBFOX2	9.36899	9.3584	9.23183	9.12327	9.01081	9.08425	9.24064
ECE1	7.15102	7.19704	7.08646	6.72736	6.63954	6.6743	6.18317
RERE	6.62774	6.88206	6.96943	5.99998	6.18913	6.19218	5.97582
RHEB	8.773	8.75757	8.70168	8.73772	8.7523	8.72948	8.65058
AP2B1	10.3989	10.4267	10.3511	10.5357	10.4594	10.5083	10.2016
LEPROTL1	9.85378	9.81806	9.76429	7.6477	7.59229	7.5374	7.853
UBE2A	10.7837	10.8098	10.7375	10.747	10.7462	10.7793	10.2979
AK1	7.33316	7.5652	7.28957	7.76515	7.83751	7.71725	7.4748
KRTCAP2	11.0922	11.1379	11.1608	11.313	11.2561	11.2965	11.462
SLIRP	12.5541	12.5058	12.4465	12.4053	12.4022	12.392	12.7913
POLR2E	6.48009	6.77412	6.48824	6.49993	6.56985	6.54395	6.25373
ENSA	9.82478	9.88931	9.99079	9.89285	9.80549	9.96976	10.1477
CBX5	7.58831	7.60332	7.55692	6.23884	6.19882	6.24714	6.32697
COL18A1	9.3898	9.33895	9.24713	9.16985	9.23999	9.19488	8.89631
FURIN	7.84807	7.98183	7.69991	7.32755	7.61033	7.62327	7.53224
PAPD7	9.30822	9.35185	9.1877	8.71324	8.80567	8.79686	8.38641
GLO1	11.3448	11.3235	11.3755	11.2754	11.2108	11.2932	11.7027
VAMP3	8.08741	8.11321	7.9591	7.7627	7.86195	7.8101	7.72985
RABAC1	10.9881	10.9818	10.8743	11.1615	11.165	11.1349	11.281
ESYT1	10.0886	10.0133	9.99427	10.1989	10.1456	10.2469	10.4413
BLOC1S1	9.36948	9.53098	9.29889	8.67115	8.68192	8.70569	8.45004
MRPL22	3.59068	3.80643	3.89978	3.74416	3.92661	3.75506	3.85404
HNRNPA0	10.5646	10.5578	10.5257	9.86461	9.95462	9.96597	9.52871
G6PD	11.6463	11.5647	11.4249	11.1546	11.1738	11.1786	11.5096
CARS	9.42966	9.44519	9.42845	8.92617	8.89603	8.9787	9.23166
FLOT2	9.22819	9.19662	9.19869	8.98145	8.97801	8.75071	9.12383
CLPTM1	9.44405	9.5369	9.39699	9.25761	9.16707	9.18514	9.00899
ITGAV	6.94498	6.96077	6.93078	7.23493	7.22396	7.43036	7.31653
ACSL1	8.52471	8.66267	8.72877	8.08181	8.09193	8.09756	7.7306
SRSF6	9.96781	9.96988	9.94025	9.94901	9.92906	9.97122	9.71202
ABHD14B	7.17378	7.31885	7.05682	6.43178	6.90902	6.87031	6.53882
ATXN10	7.54829	7.56707	7.64282	8.01887	8.06692	8.17102	7.95809
UQCR11	7.81237	7.73429	7.53236	7.99199	7.95	7.99899	7.9697
CYBRD1	8.4781	8.53095	8.55495	8.89455	8.79842	8.88443	8.74593
LSM3	11.0319	11.0214	10.9491	10.6217	10.5632	10.5855	10.2
MRPS21	9.03055	9.04519	9.07457	8.66228	8.81831	8.77214	8.34834
MRPL15	5.71607	5.79575	5.73576	6.13529	6.21852	6.07949	6.65277
CYTH2	7.47134	7.5654	7.45003	7.58089	7.63915	7.65147	7.65733
MAP2K2	10.0398	10.0593	9.93143	10.1391	10.0629	10.0731	10.1343
IGBP1	10.5441	10.6	10.5223	10.9098	10.9309	10.9374	11.2839
RPS3A	13.6524	13.6604	13.7089	13.3731	13.3293	13.4193	13.2072
CARKD	9.03001	9.02346	9.07048	8.41586	8.48181	8.46109	8.31089
PRKCDBP	6.00826	5.97841	5.88163	5.64614	5.67819	5.59445	5.41226
ICMT	8.77633	8.78901	8.68877	7.90673	7.84588	7.80682	7.57547
CLK1	7.41675	7.4798	7.35894	7.43645	7.43804	7.33531	7.53039
GJA1	6.35268	6.47221	6.6001	6.21441	6.05696	6.1272	6.51258
DNAJB6	7.62128	7.65126	7.46161	7.32913	7.29945	7.30443	7.01836
RBX1	10.6771	10.6739	10.7586	10.6907	10.6963	10.7618	10.6986
PRCC	8.13763	8.17792	8.10249	8.26763	8.38784	8.22911	8.19586
INSIG1	9.24513	9.27423	9.34002	10.1641	10.1187	10.1759	9.72045
NDUFS4	11.3263	11.3725	11.2874	11.0674	11.0472	11.0766	11.0142
EFNA1	7.93586	7.82063	7.82612	8.01865	8.02542	8.05567	7.64169
NOMO1 /// NOMO2 /// NOMO3 /// LOC101060373 /// LOC102723728	10.9243	10.9011	10.8893	10.9111	10.9247	10.905	10.5257
JUP	10.0631	9.98975	10.0713	9.61533	9.51694	9.54023	9.3117
ZCCHC3	8.0412	8.05057	7.98825	8.22612	8.21201	8.22245	8.15499
BACE2	6.44405	6.40925	6.32922	6.70313	6.8163	6.49114	6.32881
EFCAB14	7.51669	7.55067	7.35441	7.63269	7.60611	7.55491	8.01415
TMEM214	7.8994	7.85733	7.88677	8.04584	8.0414	8.07585	7.59843
HSPE1 /// HSPE1-MOB4	9.17055	9.20435	9.02341	8.80755	8.8299	8.73601	8.79721
TOMM34	9.9045	9.85474	9.73348	8.7044	8.7342	8.80126	8.30688
STARD3	8.66751	8.63738	8.60658	8.78768	8.76266	8.76077	8.67471
NDUFA11	11.6862	11.7605	11.6494	11.7713	11.7383	11.7398	11.554
TMEM167A	9.3644	9.40563	9.37998	10.0173	10.075	10.0709	10.0329
AHSG	5.17603	5.22463	5.12607	5.27051	5.36572	5.39073	5.18358
PRC1	11.557	11.5629	11.5175	10.8295	10.8451	10.8335	11.1256
FAM96A	10.1754	10.1569	10.2277	10.2265	10.1589	10.1654	10.1953
CNIH1	12.1514	12.1447	12.1877	12.1584	12.1676	12.1757	12.3127
FAF1	8.71283	8.7946	8.77406	8.58131	8.61412	8.66368	8.28936
ASNS	10.6829	10.7018	10.773	10.016	9.91873	10.0469	9.63493
CELA3A /// CELA3B	3.86574	3.52152	3.66185	3.85623	3.92078	3.59961	4.29388
PRR13	11.793	11.8271	11.7562	11.9753	11.96	11.9549	11.6547
SUMO2	12.6929	12.7264	12.8691	12.7419	12.6876	12.7128	13.1119
FAM89B	8.58445	8.62511	8.58329	8.58739	8.56682	8.63872	8.99137
VPS26B	7.55761	7.58953	7.53915	7.34966	7.29561	7.37629	7.8003
PTK2	8.7485	8.78399	8.67403	9.10772	9.07337	9.04423	8.79238
PRKCZ	7.39201	7.41891	7.21067	7.45201	7.55411	7.44859	7.47472
SERPINA5	4.43818	4.74824	4.88222	4.89884	4.83825	4.75881	4.85988
GRN	9.85682	9.98165	9.78946	10.3831	10.4406	10.4393	10.0342
TOMM20	9.29567	9.45317	9.2949	9.43266	9.36001	9.44295	9.32137
MPC2	9.88862	9.95958	9.71005	9.37853	9.38831	9.3592	8.92989
CCT3	12.3116	12.3401	12.2043	12.0868	12.0624	12.0533	11.6051
CCL2	7.82829	7.89331	7.80645	7.67331	7.76304	7.61304	7.90077
TGFB1	8.91526	8.91492	8.84559	9.05761	8.9943	8.99278	9.46973
RAB11FIP5	7.22158	7.30086	7.2722	7.64147	7.58108	7.5946	8.05874
BAZ1B	9.54369	9.60929	9.51898	9.21445	9.23161	9.15424	9.08
BACE1	6.0133	6.04602	6.11684	6.50455	6.27916	6.40699	6.30289
ADH5	9.59262	9.55241	9.58891	9.18955	9.2104	9.25745	8.81166
ADH5 /// ADH5P4	9.55225	9.414	9.45464	9.0847	9.1437	9.19825	9.07565
ADGRG1	11.4065	11.4136	11.3928	11.0579	11.0441	11.0345	11.479
WBP1L	6.67887	6.55917	6.63391	6.62484	6.60821	6.62068	6.62027
AKR7A2	9.41411	9.43517	9.34036	9.00691	9.03448	9.02198	9.44816
MRPL1	9.43524	9.48668	9.42862	9.30449	9.38951	9.31887	8.97686
TP53INP2	6.48315	6.89949	6.71368	6.73255	6.71483	6.57899	7.02773
SELENBP1	7.57019	7.71147	7.63057	7.7707	7.57176	7.58715	8.05465
EIF4EBP2	6.7414	6.942	6.7521	7.22662	7.19904	7.17018	7.24578
HTRA1	8.76599	8.80448	8.8039	8.80432	8.81169	8.79654	8.67171
LGALS9	7.06784	6.9258	7.12647	7.10501	7.09584	7.00231	7.52505
MET	8.31042	8.24742	8.19686	8.36526	8.45183	8.39406	8.78942
PKDCC	8.34917	8.34467	8.32346	8.17894	8.21006	8.40141	8.08116
RPS4Y1	12.3505	12.4153	12.3592	12.7423	12.7304	12.7885	12.3997
ALDH18A1	9.99607	9.91549	9.93074	9.95206	9.97305	9.92525	10.3216
MT1E	6.27172	6.03457	6.15243	6.12141	6.14441	6.20117	5.93546
NDUFB8	10.7243	10.8102	10.7719	10.884	10.8265	10.929	11.2762
C1QA	6.39223	6.35399	6.4148	6.51644	6.53897	6.38757	6.77491
UNG	10.5512	10.6087	10.6375	9.94348	9.96904	9.91892	9.52412
SPTBN1	8.69661	8.67303	8.63494	8.24223	8.29041	8.35819	7.90343
PCDHGC3 /// PCDHGB4 /// PCDHGA8 /// PCDHGA12 /// PCDHGC5 /// PCDHGC4 /// PCDHGB7 /// PCDHGB6 /// PCDHGB5 /// PCDHGB3 /// PCDHGB2 /// PCDHGB1 /// PCDHGA11 /// PCDHGA10 /// PCDHGA9 /// PCDHGA7 /// PCDHGA6 /// PCDHGA5 /// PCDHGA4 /// PCDHGA3 /// PCDHGA2 /// PCDHGA1	7.6139	7.65165	7.6827	8.32812	8.28953	8.44003	8.07093
POMC	4.76336	4.63958	4.74892	4.63062	4.48583	4.7716	4.70461
PMF1	9.2381	9.19957	9.05653	8.89431	9.0377	8.9681	8.71752
USP39	9.93879	9.83653	9.81505	9.69487	9.65918	9.68364	9.78382
SLC39A13	7.53717	7.52613	7.49922	7.52461	7.52689	7.4312	7.33459
MNAT1	8.94786	8.99833	8.85719	7.42339	7.35063	7.20625	6.88947
SCD5	7.97219	8.08203	8.20289	8.48341	8.46809	8.5132	8.58655
RAPGEF1	7.90642	7.81332	8.05093	6.11387	6.27743	6.46513	6.61464
RAD21	10.7209	10.749	10.7366	10.1614	10.1857	10.2068	10.1929
TAF7	10.3696	10.4946	10.523	10.521	10.5174	10.5567	10.9409
USO1	9.89855	9.87326	9.75979	10.3367	10.3454	10.368	10.2025
POLR2L	12.9777	12.9947	12.9081	12.8428	12.8606	12.8907	12.6245
RNF181	10.1013	10.1265	10.0939	10.3081	10.3312	10.2835	9.9458
KEAP1	9.56277	9.60278	9.57599	9.64852	9.6692	9.69501	9.71615
COMMD4 /// LOC440292 /// LOC646670 /// LOC732265	10.8869	10.8653	10.7849	10.5533	10.578	10.5186	10.209
PRAF2	7.10963	7.05215	6.8492	7.23351	7.19001	7.19356	7.53538
COMT	6.91186	7.06136	6.98908	7.04266	7.26378	7.15909	7.253
NUDT9	9.52839	9.56807	9.50223	9.54452	9.5877	9.56738	9.63735
DDX56	10.4809	10.5024	10.4066	10.4031	10.4839	10.3653	10.7016
RFTN1	7.75572	7.7315	7.57401	8.0121	8.01472	8.02481	8.08674
MYO1C	8.48318	8.55574	8.41941	8.59261	8.56678	8.5591	8.32802
RHOBTB3	8.73547	8.65854	8.82513	8.71868	8.63034	8.72624	8.58734
MRPS35	10.8252	10.8037	10.8119	10.7375	10.6908	10.6805	10.4047
TUBA4A	11.1234	11.0797	10.9636	10.1674	10.2162	10.2031	10.5697
NELFB	8.97934	9.00291	8.91279	8.6501	8.61234	8.61167	8.79463
RFXANK	8.91863	9.01515	8.83996	9.15148	9.10942	9.07318	9.16888
GBA2	7.0947	7.0972	6.84638	6.4602	6.61008	6.74091	6.73152
SIAE	7.21063	7.36135	7.34424	7.49093	7.46558	7.46045	7.6807
NIF3L1	9.04435	9.01942	8.87583	8.6121	8.63212	8.63212	8.57971
ISCA1	8.28042	8.27723	8.38353	8.43584	8.31118	8.37968	8.24168
UQCRB	10.3764	10.1745	10.3508	10.4367	10.3796	10.4352	10.2548
GNL2	9.29955	9.31817	9.33715	8.93937	8.94256	8.98745	9.08847
RAF1	8.52311	8.60409	8.48202	8.33892	8.32161	8.39342	8.74703
PUM1	9.4196	9.47475	9.39648	9.49876	9.46091	9.48553	9.83934
STRAP	11.5267	11.4617	11.5762	11.4823	11.3818	11.4626	11.6472
LARP1	8.73626	8.66906	8.69425	8.66384	8.69939	8.72458	8.23514
F13A1	6.22307	6.20005	6.26803	6.28831	6.39001	6.20851	6.10726
SPINT1	5.50126	5.5487	5.57658	5.62825	5.62664	5.43174	5.90135
GRINA	9.29568	9.21997	9.09838	9.29799	9.25939	9.32477	9.72819
UNC119B	9.58495	9.62176	9.54449	9.51504	9.43501	9.42828	9.43319
STK38	9.93707	9.90181	9.86913	9.74492	9.71071	9.697	10.1416
FCGBP	5.48809	5.36308	5.46893	5.41991	5.35295	5.23802	5.47056
WDR59	9.03569	9.07653	8.9642	9.36545	9.36554	9.30452	8.93147
PIGT	9.50729	9.40421	9.37979	9.74438	9.78888	9.69806	9.31845
STATH	3.80156	3.84919	3.71585	3.69444	3.68783	3.80882	3.93298
SERPINA3	5.23774	5.23431	5.14164	5.51204	5.5356	5.34675	5.59446
SIVA1	10.6053	10.6784	10.5588	9.94395	9.95434	9.93066	10.06
MAP4	9.03295	9.056	9.08851	9.01622	9.02116	8.96781	9.46996
CHMP4B	8.81918	8.74085	8.67968	8.81364	8.7617	8.74706	8.45973
ADRM1	11.012	10.96	10.8268	10.9275	10.9351	10.9528	10.982
PIR	10.4028	10.3566	10.4502	11.3108	11.2442	11.3419	11.5449
CRMP1	6.31977	6.45755	6.34585	6.70485	6.51269	6.62524	7.06136
CUL3	8.40612	8.45811	8.57775	8.6004	8.56738	8.76475	8.19683
AKR1A1	9.37712	9.39754	9.40043	9.66778	9.62466	9.64424	9.92628
GTF2E2	10.2631	10.3255	10.2234	10.2268	10.2037	10.2548	9.79243
SRRM2	8.30287	8.37468	8.40831	8.4411	8.42378	8.50187	8.01308
MOCS2	9.17887	9.17409	9.2156	8.82748	8.64551	8.78445	8.28463
ADD1	9.87338	9.88561	9.78991	9.8174	9.77934	9.80648	9.43215
VPS37B	7.96458	8.04472	7.88582	8.1893	8.17163	8.12996	7.73625
SDR39U1	9.73756	9.73481	9.66645	9.70338	9.6827	9.56356	9.64731
C10orf10	5.45307	5.2172	5.44763	6.03709	6.00015	5.94964	6.03387
S100A9	3.74701	3.68698	3.86288	3.78357	3.84837	3.57178	4.21384
PFDN2	9.5057	9.51956	9.41754	9.28087	9.29846	9.30267	9.6145
SPON2	7.00703	7.13799	7.25178	7.30412	7.4363	7.36012	6.96973
GSTK1	9.86788	9.85821	9.79005	9.98647	10.0428	10.0443	10.0714
ELAVL1	6.21105	6.44972	6.33622	6.36062	6.32416	6.26978	6.39018
EGFL6	2.98476	2.95034	3.1359	3.33015	3.17457	3.30469	2.87647
PPT1	9.67001	9.73062	9.70039	9.87636	9.84125	9.79088	9.59869
SZRD1	8.98928	9.08837	8.86406	8.08795	8.08314	7.86755	8.44552
PRSS8	5.60566	5.67754	5.72596	5.85696	5.8863	5.79092	6.36777
TNNI1	8.16595	7.92384	7.97394	8.04216	8.04263	7.91945	8.37866
PSMC1	11.3495	11.2936	11.307	11.3089	11.2293	11.3026	11.347
DRAP1	10.2819	10.279	10.1485	10.6003	10.61	10.5787	10.317
TLR9	5.9771	5.94431	6.13273	5.92581	5.71792	6.19457	5.80016
FGFR1	7.5768	7.63022	7.49704	7.35574	7.33767	7.31592	7.5229
ISLR	3.72511	3.43352	3.83618	3.84298	4.01095	3.86998	3.80787
HES1	7.31183	7.30605	7.24838	9.48531	8.84958	8.76148	9.08841
LRRC49	7.04452	7.18777	7.04268	7.01034	6.91439	6.79729	6.95771
RHBDD2	9.72758	9.65302	9.55341	9.61034	9.58842	9.62191	9.73964
HLA-DMA	4.84916	4.69756	4.68949	5.12352	5.16187	5.0765	5.20207
PSMG3	8.69131	8.75662	8.61288	7.93541	8.05436	7.96921	8.09044
TNS1	6.03792	6.05425	6.07907	6.1478	6.28127	6.10334	6.10064
STRN4	8.78356	8.70254	8.61026	8.6927	8.73868	8.73626	8.72143
AIMP2	10.6414	10.6795	10.6667	10.8989	10.8689	10.8053	10.4491
SDCCAG3	9.80406	9.86157	9.76987	9.53399	9.52058	9.55035	9.95041
PRRC2C	7.40308	7.4292	7.245	7.2574	7.30018	7.28689	7.29044
NOTCH3	5.18916	5.17704	5.03614	5.67505	5.56761	5.73959	5.90671
RPA1	6.40586	6.57428	6.64536	6.61655	6.62986	6.52884	6.29655
KDM3A	6.48218	6.60024	6.48882	6.61497	6.68898	6.54219	6.46077
CCDC6	6.77669	6.86915	6.61615	6.61784	6.66159	6.58442	6.49516
SDC1	9.60367	9.6209	9.46054	9.10872	9.17317	9.1278	9.33544
TMEM43	8.68332	8.73222	8.60976	8.15486	8.07299	8.089	8.558
CYSTM1	11.1555	11.0854	11.0307	11.0545	11.1182	11.1208	11.543
G3BP2	9.98327	9.90302	9.96776	10.2157	10.1421	10.189	10.5065
DYNLT1	11.2938	11.2985	11.2147	11.3958	11.402	11.4367	11.7716
PDZD11	10.5335	10.4514	10.4929	10.4566	10.4145	10.4292	10.7688
AXL	8.03411	8.00164	7.96549	8.30555	8.28829	8.41416	8.52359
TMEM165	9.12579	9.10197	9.31403	9.44117	9.41861	9.51897	9.81171
BTBD1	10.5415	10.5015	10.5818	10.538	10.5253	10.5931	10.2368
SLC44A1	9.85549	9.95378	9.92994	9.16838	9.1023	9.1499	9.1967
SEC24B	8.9994	9.0028	9.04239	9.08429	9.1059	9.15764	9.0648
CHMP1A	9.29956	9.32071	9.21736	9.09643	9.08381	9.06901	8.96948
KBTBD2	8.61573	8.69459	8.62373	8.69475	8.68886	8.67816	8.19243
ADAM12	5.03629	4.92901	5.05202	4.99777	5.01481	5.08186	4.61398
STOML2	10.8933	10.9041	10.7877	10.6119	10.5732	10.5608	11.0672
PFDN5	11.2778	11.2471	11.2233	11.2469	11.2611	11.2543	11.6029
CRABP2	6.1824	6.20003	6.28761	6.65524	6.60318	6.49919	6.87666
AP2S1	11.6666	11.6979	11.6172	11.5704	11.5351	11.5443	11.4324
ABCF3	8.52451	8.50632	8.41312	8.39839	8.40203	8.36511	8.34049
RPLP2	13.5152	13.533	13.504	13.4894	13.4767	13.4729	13.1709
TSPO	11.0025	11.0767	11.0065	11.1429	11.1188	11.0894	11.1107
REEP5	10.1797	10.1683	10.1019	10.0821	10.0512	10.0689	10.0652
MRPL36	12.2078	12.1749	12.1307	11.9727	11.9743	11.9795	12.1081
SS18L2	9.48215	9.54907	9.52864	9.06426	9.0287	9.11151	9.4377
TNPO1	11.2668	11.296	11.3123	11.8754	11.8779	11.9116	11.7377
CDK2AP2	9.80993	9.87369	9.77159	9.21118	9.28393	9.25498	8.9249
XPO1	10.0777	10.0343	10.1129	9.90959	9.82211	9.80913	9.79525
ANAPC13	10.5384	10.5831	10.5484	10.8721	10.8621	10.8245	11.0871
KIF3B	8.78812	8.76856	8.75265	8.61464	8.45113	8.64568	8.96575
IER5	10.556	10.5997	10.6375	10.6664	10.5993	10.6537	10.8911
ANGPTL4	6.95862	6.88161	6.75797	7.10112	7.15042	7.09789	7.4349
SERPINB2	2.92746	2.81785	2.85048	2.74024	2.90077	2.80357	3.02377
FXR2	9.1694	9.11068	9.03552	9.25875	9.20178	9.25607	9.242
TMEM50A	8.22142	8.34162	8.22942	8.31277	8.31522	8.42091	8.25625
AARS	10.7043	10.678	10.5649	10.027	10.0207	9.9782	9.99446
EMC7	11.4721	11.4703	11.4285	11.4824	11.4876	11.5513	11.1409
COL4A1	9.18188	9.09629	9.12279	10.6646	10.7222	10.7098	10.3355
PSMB10	9.90246	9.9638	9.80437	9.98768	10.0354	10.0201	10.2417
DTYMK	10.2782	10.2814	10.2567	9.51857	9.53296	9.5143	9.55765
ERLEC1	9.97953	10.0918	10.0721	9.8942	9.88746	9.88547	10.009
TTC19	9.6116	9.64055	9.56139	9.95317	9.94559	9.9211	9.71817
HM13	9.66807	9.63187	9.48205	8.90332	8.94471	8.95162	8.57133
DHX40	9.8644	9.82868	9.91212	9.77483	9.84243	9.9204	9.64262
UBE2Z	10.5444	10.5246	10.4962	10.691	10.68	10.6663	11.0395
EML4	7.00738	7.07507	7.12438	6.68868	6.54358	6.64273	6.48171
TRAF4	10.1629	10.1555	10.0175	10.335	10.3785	10.3372	10.2759
HNRNPH3	9.33604	9.21984	9.37782	8.97383	8.94893	8.9565	9.38834
GRAMD4	4.9088	5.14033	4.86925	4.67299	4.76082	5.01409	4.6973
SUSD6	7.8354	7.80623	7.8458	7.9661	7.9486	7.78615	7.82035
GDF15	10.8396	10.792	10.6511	11.019	11.0082	11.0477	10.6404
ID3	12.0361	12.0355	12.0084	12.293	12.2682	12.3007	12.5563
MTHFD1	10.661	10.654	10.6405	10.3206	10.3075	10.3455	10.6017
RAB1A /// RAB1B	9.50739	9.48622	9.46161	9.24815	9.1848	9.17074	8.83354
PIGY /// PYURF	10.81	10.8463	10.8071	10.0814	10.0706	10.1252	10.034
ACIN1	9.60533	9.57847	9.55924	9.59179	9.60359	9.57036	9.93817
ZNF106	7.96458	8.09711	7.86971	7.65439	7.60476	7.65583	7.15085
SLC39A9	5.35156	5.47739	5.5544	6.38154	6.56049	6.54561	6.0731
MYO1D	3.82779	3.49228	3.26424	3.43817	3.57641	3.3292	3.55444
ABR	5.94423	5.98605	5.89462	5.65419	5.67869	5.52724	5.88021
GOLGA3	8.47633	8.37851	8.45131	8.28384	8.31897	8.33462	7.96861
NPEPPS	8.9405	9.05677	9.0683	9.17274	9.08699	9.21988	8.69139
TSPAN6	9.66897	9.69742	9.74617	9.52605	9.58614	9.56534	9.24639
FABP4	3.96177	3.94809	4.03157	3.97862	4.00551	3.92764	3.72637
HBP1	8.96519	8.92377	8.87959	9.2162	9.22229	9.27904	8.79595
CMAS	10.2728	10.2308	10.202	10.0218	10.0105	9.99069	9.67825
SNAPIN	10.3601	10.3515	10.1475	10.1127	10.1164	10.0942	10.1525
CCNDBP1	9.17099	9.23937	9.12127	9.30703	9.24498	9.20991	9.7205
SEMG1	3.65558	3.40328	3.50962	3.52486	3.50874	3.39986	3.46701
PRKACB	9.38252	9.29803	9.32976	9.66495	9.66222	9.76188	9.87729
TRIM44	7.20105	7.27292	7.32116	7.23743	7.22521	7.06995	7.0146
ARL2BP	9.51408	9.55969	9.52137	9.29074	9.28612	9.30327	9.51128
DDR1	9.38625	9.3926	9.28206	9.30708	9.31264	9.32534	8.97185
ADM	9.79218	9.85798	9.74697	10.7411	10.6753	10.7886	10.5413
TCEAL8	8.50784	8.49055	8.49129	8.71032	8.73497	8.81809	8.7324
ARHGAP17	7.98243	7.90912	7.98243	7.53131	7.61693	7.68187	7.54775
CTSB	12.2087	12.1487	12.1731	12.0005	12.0003	11.9892	11.8584
NINJ1	9.18111	9.22442	9.13997	9.52053	9.47189	9.43799	9.73069
GLA	10.2068	10.1536	10.1048	10.31	10.2147	10.3402	10.2633
AKT1S1	7.46291	7.53212	7.48754	7.49667	7.58335	7.47684	7.99355
PHF1	5.83325	5.88375	5.77113	5.65703	5.68303	5.67016	5.61009
DPY19L1	9.37786	9.31611	9.40323	9.37664	9.27735	9.44344	9.60352
ADCY6	7.80333	7.94629	7.66192	7.83184	7.91319	7.89859	7.95452
PLK1	8.79033	8.7681	8.64535	8.20728	8.33819	8.33082	7.79437
TPM1	11.7034	11.7147	11.6779	10.7558	10.7843	10.7842	10.9429
EMC3	10.1186	10.1618	10.1315	10.2345	10.194	10.1426	10.5772
SPSB3	7.83917	7.77315	7.74649	7.8581	8.02649	7.92006	7.88489
CRYBA4	3.96712	3.86431	3.85308	3.85858	3.82167	3.92006	3.64644
IRF1	7.78848	7.80388	7.7085	8.77591	8.78124	8.81088	9.06547
RNF185	7.92814	7.99975	7.80665	8.09057	8.13678	8.25089	8.02605
PRPF19	10.7669	10.7734	10.7169	10.7568	10.7726	10.7156	10.7565
PDRG1	9.45415	9.51525	9.36136	9.04536	9.00131	9.03676	9.49169
MSRB1	9.97497	10.0129	9.93862	10.2582	10.2573	10.2798	10.0542
GRAMD1A	9.5061	9.587	9.46727	8.22664	8.10544	8.15916	7.95129
SLC6A8	5.79768	6.08618	5.97797	5.6571	5.72354	5.80095	6.1464
TJP2	6.67179	6.7429	6.84288	6.21969	6.02393	6.07949	5.95912
FAM60A	8.97066	9.05584	8.89239	9.2998	9.26107	9.29915	9.00441
AFF1	5.50631	5.50695	5.47023	5.45742	5.38002	5.34336	5.10878
CD99L2	7.99438	8.09805	8.02232	7.80164	7.87479	7.75289	7.63994
GNS	7.53155	7.56966	7.4433	7.79613	7.82098	7.79056	7.67438
TPGS2	9.3623	9.33436	9.33879	9.7147	9.62007	9.75504	9.77657
RNF7	10.3008	10.2568	10.2733	10.3521	10.3341	10.3912	10.2985
DHX30	8.7923	8.84727	8.74819	8.75866	8.74417	8.57878	8.84828
CASP4	5.75321	5.62094	5.84814	6.25564	6.13634	6.04332	5.91166
PGC	6.38096	6.12234	6.25712	6.62557	6.64764	6.4837	6.36189
NSMF	7.47595	7.63945	7.64179	7.81067	7.75376	7.68469	8.0575
IQGAP1	10.2755	10.2785	10.2012	10.001	10.0359	10.1175	10.4959
UBQLN2	8.41333	8.52433	8.78108	8.42708	8.23502	8.41363	8.67056
CHERP	6.62566	6.62842	6.56184	6.92651	6.83958	6.84441	6.49615
SIK1 /// LOC102724428	11.1401	11.1296	11.1437	10.3404	10.3259	10.3407	10.297
C11orf68	7.17544	7.2527	7.24081	7.17824	7.16881	7.06432	7.63854
SORBS3	8.244	8.47612	8.24717	7.05171	7.12239	7.31817	6.8673
RAI14	8.00819	7.98277	7.97782	7.85065	7.83824	7.85436	8.19855
EPS8L2	8.33097	8.29743	8.2403	8.60787	8.61161	8.61916	8.50414
EIF1AX	9.00685	9.08223	9.11014	8.66697	8.60993	8.67255	8.37201
CLDN4	6.22159	5.9517	5.99153	6.51102	6.6637	6.59033	6.23851
TBL1XR1	9.88115	9.95096	9.8744	9.42467	9.41378	9.38398	9.3532
TRAK2	8.13069	8.14784	8.12173	8.59958	8.53187	8.47768	8.57419
B4GAT1	7.79026	7.87883	7.62591	8.20772	8.08772	8.24427	8.30777
TARS	11.9029	11.885	11.8196	10.9078	10.8703	10.9256	11.0495
RCN1 /// DKFZp686K1684	10.191	10.0108	10.0999	9.69338	9.58049	9.77801	9.65177
CCNB2	10.3247	10.4024	10.2972	9.83341	9.76572	9.81331	10.132
MYL6	13.1515	13.1951	13.1702	13.1674	13.1584	13.169	12.7441
IFI16	5.19887	5.11304	5.5506	6.80379	6.93435	6.69332	7.2497
LBR	10.795	10.7904	10.8543	9.77594	9.69359	9.73221	9.71054
NDN	3.59068	3.66548	3.68857	3.68103	3.74212	3.67508	3.59321
FADD	9.55888	9.57417	9.46027	9.61095	9.62724	9.57315	9.43719
SETD5	6.02203	6.1575	6.07593	6.30453	6.27054	6.17913	6.18057
SBF1	5.38178	5.23664	5.2172	5.36656	5.41695	5.28667	5.30517
PLEKHA2	7.88439	7.83822	7.95225	7.91241	7.84623	7.89254	8.06972
CSNK2A2	8.61457	8.55587	8.40106	7.7265	7.86397	7.70933	7.76978
ITPA	10.6242	10.6308	10.4575	10.6674	10.6729	10.6546	10.8662
CDC16	9.54374	9.6269	9.65281	9.26965	9.20118	9.21931	9.4775
SIN3B	8.2864	8.42329	8.13982	8.51689	8.53964	8.411	8.40079
GATM	6.55324	6.55064	6.40973	6.65475	6.77686	6.68001	6.78982
SLC2A1	5.22934	5.1839	5.38717	5.23533	5.21896	5.20119	5.64326
ENOPH1	8.7848	8.89257	8.72334	8.15714	8.09848	8.0757	8.33892
VSIG4	3.60284	3.47698	3.5455	3.527	3.59438	3.68698	3.92394
CUL1	10.6108	10.5725	10.4578	10.3563	10.3783	10.4607	10.6674
PRSS1	4.92713	5.08371	5.03264	5.08773	5.05353	5.11491	4.69915
ATPIF1	11.7583	11.8147	11.8235	11.7793	11.7171	11.7309	11.4497
BDH2 /// SLC9B2	8.08813	7.97501	7.98659	8.36593	8.45644	8.3895	7.91353
BDH2	6.95513	7.01263	6.85152	7.25989	7.29919	7.19718	7.52418
FMOD	5.21911	5.1256	5.35715	5.32045	5.49012	5.48205	4.99739
RPS19BP1	10.5307	10.5336	10.3052	9.871	9.96504	9.85817	10.3661
NPC2	11.3437	11.3357	11.305	11.4139	11.3902	11.4196	11.4292
ATG9A	6.8011	6.8801	6.79867	6.66742	6.68795	6.71365	6.3744
XPOT	10.6649	10.5874	10.8032	10.6395	10.6323	10.7726	10.685
TM7SF3	7.58796	7.68816	7.67893	8.27762	8.18044	8.21514	8.59563
PRRC2A	8.07899	8.0676	7.97241	8.09388	8.07034	8.1419	7.7875
DHRS3	10.0157	10.0522	9.95026	9.99113	9.98831	9.97011	9.7205
CDV3	8.33591	8.35384	8.23664	7.97458	8.00693	8.07769	7.77248
RASD1	5.3808	5.33331	5.2436	5.439	5.49533	5.44435	5.1545
UBE4A	9.25099	9.41461	9.48773	9.58527	9.55171	9.56536	9.38375
CD53	3.21393	3.19748	3.31192	3.09416	3.27539	3.3522	2.87449
CASC4	9.09177	9.15197	9.21695	7.9754	7.86065	7.94882	8.03446
DNAJC13	7.93285	7.96671	7.97603	8.02882	7.95976	8.04775	7.54049
STIM1	7.76481	7.79955	7.75162	7.65889	7.63693	7.64469	8.0224
MS4A6A	2.96424	2.8947	2.95484	2.81367	2.80571	2.69903	3.13246
SLC43A3	3.35975	3.22884	3.17136	3.112	3.17136	3.13059	3.16831
PREX1	6.75004	6.92732	6.71474	7.39632	7.35131	7.30204	7.57113
MFSD14B	10.0356	10.0613	10.0794	10.3739	10.2579	10.449	9.89035
IMPAD1	9.40364	9.4727	9.4719	9.25807	9.18282	9.10978	8.99103
COPG1	9.29145	9.25982	9.18617	9.47224	9.42256	9.37014	9.91477
B4GALT3	8.23377	8.3617	8.3281	8.06683	8.03683	8.04872	8.34573
SUPT7L	6.60017	6.41292	6.5062	6.61768	6.47563	6.28227	6.12901
MRPL51	12.4415	12.3844	12.3851	12.2213	12.2349	12.2453	12.2945
ETFA	11.7012	11.6558	11.6677	11.6601	11.6552	11.7282	11.3359
PIAS3	7.56771	7.68036	7.63071	7.71564	7.78654	7.71486	7.88454
TMEM184B	9.03974	9.08935	8.96528	8.85196	8.82525	8.9237	9.18992
NISCH	6.66746	6.48851	6.52112	6.63313	6.63572	6.71816	6.98155
SLC1A5	10.4703	10.4781	10.3368	9.8638	9.88085	9.94725	9.40518
FEM1A	7.51321	7.68337	7.46933	6.43337	6.47632	6.41445	6.85719
UTP18	11.0577	11.0353	11.0367	10.9768	10.9654	10.9831	11.0145
PHC2	8.17528	8.16626	8.03339	7.87775	7.84463	7.8207	8.35883
GAA	7.61817	7.48885	7.49791	7.99645	8.03251	7.97148	8.47813
ADCY3	9.05611	9.04823	9.10903	8.9463	8.83757	8.80713	8.66412
WDR46	9.1883	9.21489	9.10055	9.21907	9.20375	9.23595	9.57191
C14orf142	9.20456	9.12988	9.26134	9.1471	9.06418	9.22424	9.51074
TSTA3	9.48582	9.46309	9.29209	9.62435	9.64917	9.56415	9.29946
B4GALT5	6.65794	6.66743	6.58934	6.39901	6.45053	6.37278	6.80341
MAD2L1BP	8.94728	8.98822	8.79391	8.86824	8.88829	8.86156	9.15123
ZZEF1	7.89482	8.0637	7.89436	7.09163	7.20435	7.2281	7.01071
RAP1B	11.1819	11.175	11.289	11.4209	11.3852	11.4007	11.6005
BANF1	10.1012	10.115	9.94986	9.66783	9.73236	9.64918	9.83787
VPS45	8.92898	8.89425	8.81578	8.66737	8.6814	8.71595	9.16706
EPCAM	6.95199	7.22952	7.1601	7.48054	7.33944	7.47643	7.42135
HEXA	9.50374	9.63639	9.56422	10.0797	10.0166	10.0321	9.88418
TMEM261	4.46078	4.74311	4.82867	4.82814	4.81539	4.84311	5.16317
TOX4	7.738	7.77118	7.69597	7.78227	7.81167	7.738	8.21101
ISG15	7.60715	7.65979	7.49653	7.76975	7.82252	7.67202	7.44982
PPIE	9.28011	9.30487	9.20208	9.00168	9.04863	8.98611	9.3415
ARL3	3.60603	3.58562	3.20694	2.97273	2.94581	3.07261	2.51003
TGOLN2	7.62843	7.75442	7.64641	7.1434	7.09906	7.05844	7.29594
CDH1	6.59465	6.6311	6.58505	6.42123	6.38769	6.45673	6.24884
PITHD1	9.36652	9.41934	9.27989	9.12049	9.13043	9.14163	9.25329
RNASET2	8.59935	8.61833	8.44998	8.29183	8.291	8.30191	8.35172
NR2F6	8.49107	8.61135	8.23328	6.91648	7.08787	6.96008	6.97007
MTUS1	11.1956	11.1717	11.1637	10.7819	10.814	10.8626	10.588
PGAP3	6.80152	6.79821	6.86958	7.01683	7.14083	6.92314	6.6184
DDAH1	5.35879	5.56036	5.47103	5.54965	5.68489	5.67194	5.42994
NAGK	9.16105	9.08721	8.90306	8.93422	8.95411	8.97924	8.45829
PDIA5	8.54619	8.52471	8.36325	8.73816	8.7467	8.7583	8.93309
PLVAP	4.53328	4.21556	4.56335	4.57941	4.52589	4.4808	4.58621
CLEC11A	7.80692	7.78236	7.62374	7.34666	7.54345	7.16501	7.93365
PURB	6.87396	6.95972	6.94926	7.4268	7.37613	7.35101	7.84814
EXOC3	8.40969	8.40414	8.40838	8.22232	8.34855	8.31376	8.13235
TBC1D5	9.22799	9.27198	9.32703	8.93081	8.98232	8.96012	8.74324
DGCR2	5.58974	5.79942	5.7499	5.83889	5.70283	5.79942	5.82277
CCDC80	7.84719	7.86735	7.6119	7.22408	7.25954	7.33053	7.20048
SOD1	12.7416	12.7497	12.6664	12.7628	12.7687	12.7652	12.8069
UNC45A	9.08014	9.09289	8.95578	8.15227	8.05927	8.16377	7.70613
NUPR1	8.78868	8.83984	8.77005	7.52778	7.50439	7.51006	7.12699
SEC61B	12.1688	12.1463	12.1334	12.1753	12.1709	12.193	12.2793
HMOX1	11.6788	11.6608	11.5834	13.0299	13.0126	13.074	13.4947
TRIB2	5.79768	5.91526	6.07593	5.97858	5.82766	5.71065	6.17642
ADPRHL2	8.35664	8.41011	8.36863	8.46733	8.4406	8.39249	8.26137
EXOSC5	10.2757	10.2991	10.1823	10.1081	10.08	10.0494	10.1012
YIPF3	6.79228	6.81245	6.52147	6.80036	6.85569	6.77707	6.68259
TWF1	9.82064	9.70112	10.021	8.81139	8.80158	8.87992	8.64549
TM9SF3	10.8112	10.842	10.8576	10.9857	10.9678	11.0311	10.6923
SRXN1	11.3052	11.4057	11.294	11.6107	11.6118	11.5854	11.6567
NANS	9.96504	9.98224	9.82654	9.81742	9.7778	9.79037	9.70897
DPH1 /// OVCA2	10.297	10.3727	10.269	10.4852	10.4394	10.5441	10.062
TMEM126A	10.8243	10.8499	10.7282	10.0953	10.1563	10.1877	9.71733
CTDSP2	8.05777	8.07035	8.14019	7.2123	7.3354	7.31689	7.3569
AAAS	8.96505	9.03289	8.89825	8.96119	8.92198	8.94636	8.61157
POMGNT1	7.95915	7.90702	7.8266	7.61383	7.568	7.58419	7.5848
FAM3A	8.52078	8.60372	8.4579	8.47029	8.45919	8.49166	8.40124
PPM1F	5.53883	5.72129	5.73546	5.08971	4.83188	5.07503	5.28216
ATN1	5.85609	5.80007	5.89462	5.59882	5.61429	5.60868	5.68003
NRP2	8.84383	8.96873	8.84704	8.75363	8.66311	8.83382	8.77869
MRAS	5.09532	4.99215	4.74226	5.04875	4.99879	4.98135	4.94041
NSF	10.1857	10.2067	10.1972	9.89558	9.88045	9.87767	10.0801
PDK4	8.79106	8.88707	8.87741	9.19803	9.10916	9.19168	9.56684
GLRX3	10.5547	10.4893	10.7253	10.8614	10.7864	10.942	10.335
NSFL1C	8.64103	8.77402	8.63753	8.9168	8.91113	8.8411	9.32537
SLC35A4	8.73275	8.74734	8.58847	8.72424	8.74011	8.74454	8.73694
MIEN1	10.2455	10.2426	10.1786	10.3466	10.3376	10.3109	10.8103
CMSS1	9.59561	9.67382	9.58989	9.31181	9.26559	9.32496	9.22194
CDC34	8.90909	8.95475	8.83632	8.81402	8.82712	8.75657	8.38292
PNKD	9.33853	9.35737	9.33207	9.09841	9.18375	9.0934	9.58401
GTF2B	9.46044	9.43874	9.43701	9.51198	9.54236	9.45993	9.70417
HMGCS1	8.94663	9.06896	9.00997	9.11131	9.02979	9.05794	9.4475
PNRC2	9.59441	9.52084	9.53613	10.126	10.0838	10.1624	10.363
AREL1	5.63309	5.39039	5.25489	5.51204	5.34095	5.26243	4.92883
CIC	7.95019	8.08309	8.08916	8.10379	8.0631	8.06399	7.65545
CSF1R	5.82338	5.7748	5.63993	5.72703	5.92365	5.84918	5.49847
WSB2	10.5037	10.5347	10.5084	10.3226	10.3359	10.3965	10.6192
TSPAN4	10.8853	10.9604	10.9057	10.8209	10.8063	10.7111	10.5369
RHBDD3	7.82319	7.67331	7.51931	7.91491	8.03125	7.95564	8.16701
RASA1	8.83404	8.86034	8.95889	7.19537	7.14158	7.30349	7.40726
GUCD1	8.4362	8.45448	8.29136	7.93877	8.03252	7.94536	8.15615
YTHDC1	9.84797	9.88518	9.86408	9.89558	9.93706	9.90416	9.42468
FKBP9 /// FKBP9P1	7.88905	7.83654	7.75558	7.70138	7.64743	7.52987	8.16847
POLDIP3	8.13396	8.08502	7.91581	7.4049	7.42763	7.41832	7.70846
BNIP3L	9.1735	9.24135	9.18403	9.58904	9.59384	9.73987	9.74459
MCFD2	10.5686	10.5338	10.6215	10.3404	10.3047	10.4164	10.1493
ATP6V1E1	10.341	10.3615	10.2964	10.4287	10.4271	10.427	10.122
VAMP8	6.75156	6.85331	6.7582	7.05812	7.16699	7.13192	7.30516
SNRPF	12.003	12.0146	11.9543	11.792	11.6828	11.7919	11.5023
CLDN7	5.39451	5.37438	5.2111	5.51204	5.54109	5.61857	5.24052
LAMTOR2	10.0438	9.98888	9.84817	10.0913	10.1057	10.0747	10.5107
OCIAD2	10.1942	10.271	10.2053	10.6495	10.6678	10.6452	11.1293
ATP1A1	10.7517	10.7865	10.7335	10.6256	10.6632	10.6182	11.1187
TMEM222	9.13467	9.10145	9.08723	8.82109	8.8504	8.85515	9.29904
SDF2	9.46708	9.54128	9.46739	9.74321	9.75831	9.82676	9.46712
MRPL23 /// LOC102724828	11.0742	11.066	10.909	11.001	10.9757	10.9045	10.8962
CXCL5 /// GLYR1	11.1	11.109	11.2085	10.7023	10.6757	10.7031	11.0982
GLYR1	8.76965	8.97542	9.02998	9.05766	9.03824	9.18648	9.10666
BAP1	6.18397	6.49488	6.18989	6.23985	5.99483	6.13575	5.62057
PACS1	6.95947	6.92416	7.05543	7.11359	7.03563	6.97965	6.95368
KIAA0141	7.09537	7.18489	6.94513	6.94413	6.94538	7.06249	6.70823
HDAC5	6.46454	6.7165	6.63987	6.83638	6.91322	6.76307	6.90844
RNF13	9.50821	9.57401	9.43027	9.35174	9.34825	9.39794	9.53022
GADD45A	9.39497	9.60981	9.55518	11.1058	11.097	11.0946	11.2452
MTMR4	4.82838	4.83564	4.81919	4.75545	4.77183	4.81964	4.39986
GID8	9.1306	9.10596	9.08485	8.47364	8.45923	8.41445	7.97725
TCERG1	9.23773	9.18258	9.2719	9.29813	9.25179	9.29461	9.05426
C2	5.26313	5.29173	5.41991	5.55534	5.80731	5.79847	6.09755
C11orf95	7.12798	7.25644	7.14241	7.11288	7.17762	7.2086	7.08836
CLDND1	9.9351	9.82567	9.81759	9.74448	9.84603	9.8721	9.54876
DES	5.00366	4.80023	4.61806	4.94445	5.12087	4.72577	4.93643
DES /// SUPT20H	7.7028	7.77077	7.81067	8.01328	7.91425	7.87815	7.4707
SSR1	11.0407	11.0084	11.1854	11.1558	11.1504	11.1999	10.9448
CORO1C	9.08912	9.20202	9.17939	8.94957	8.93354	8.99941	8.56725
RPL5	12.6958	12.719	12.75	12.884	12.8926	12.8573	13.0762
CECR5	9.30149	9.34457	9.27859	9.14076	9.19429	9.07256	9.05187
DECR1	9.59481	9.61429	9.56428	9.52789	9.44668	9.54262	9.7353
PPP1R1B	5.36918	5.59538	5.49005	5.60542	5.42033	5.46271	5.59341
AP1M2	9.1886	9.21186	9.08381	9.12814	9.11502	9.12675	9.47556
SMARCD2	8.89621	8.95257	8.77952	7.19016	7.10809	7.03922	6.99559
CPQ	5.59945	5.622	5.88587	6.11923	6.21711	5.9731	5.68043
GREM1	5.37203	5.03735	5.26386	5.32621	5.33537	5.41991	5.47995
DIP2B	8.32832	8.32095	8.13388	8.45817	8.49675	8.43644	8.68435
KTN1	10.3592	10.369	10.3982	10.5553	10.5595	10.6117	11.0178
AEBP1	6.54657	6.42819	6.56248	6.73499	6.62652	6.68037	6.84229
LZTS2	7.30741	7.31979	7.29465	7.43979	7.4764	7.48055	7.02036
ZFAND6	10.6703	10.7075	10.6563	10.746	10.7504	10.7293	10.6648
ZFAND6 /// ATP8B5P	10.5419	10.4988	10.6043	10.6814	10.631	10.6868	11.0274
VPS52	8.54355	8.43698	8.36264	8.42665	8.46704	8.50096	8.40788
TSPAN9	8.12835	8.22432	8.11026	8.17892	8.24856	8.0901	8.62388
PRPS1	10.5931	10.4882	10.3366	9.34044	9.30616	9.31828	8.95241
RBM39	9.23818	9.21065	9.17939	8.77372	8.72858	8.58868	8.82418
HIST2H2BE	5.7422	5.80977	5.98941	6.23228	6.42488	6.1165	6.36522
CDKN1B	8.59004	8.63103	8.75489	9.07375	8.97588	8.99816	9.46651
TCTA	7.36184	7.44912	7.22186	7.88744	7.83158	7.7892	7.98938
COX6A1	13.2533	13.221	13.1659	13.2982	13.3145	13.3042	13.1912
HSPH1	10.6812	10.6459	10.6205	10.5001	10.4842	10.5343	10.2894
NAA20	11.4974	11.529	11.5965	11.4977	11.4651	11.4076	11.4851
RPA2	10.2007	10.2318	10.2241	9.97682	9.95964	10.1019	9.73185
HIST1H2BK	10.9498	11.0007	10.9784	11.2906	11.2865	11.3492	11.5656
SLC38A1	8.40298	8.50003	8.35303	7.6532	7.45499	7.51143	7.71769
GRHPR	10.5241	10.5354	10.4407	10.7106	10.7281	10.6753	11.1458
PSMB5	11.2162	11.2535	11.1256	11.1605	11.1325	11.1817	11.3472
PDLIM5	11.832	11.7668	11.882	11.3615	11.3508	11.3878	10.9089
PCM1	7.30948	7.25999	7.42608	7.11885	6.91325	7.15222	6.76108
REPIN1	5.74439	5.87235	5.66361	5.74483	5.87235	5.63046	5.88546
ETHE1	8.65326	8.66776	8.59019	8.83482	8.81526	8.86394	8.80966
SUPT16H	10.5377	10.5094	10.3912	10.2611	10.2694	10.2689	10.2074
CERK	7.51584	7.56198	7.55826	7.50955	7.50714	7.48493	7.72881
SH3BP1 /// PDXP	8.43167	8.46743	8.36307	7.83579	7.86497	7.84275	8.0217
P4HA2	9.28762	9.26428	9.14949	9.6791	9.70623	9.68705	10.0205
C6orf106	7.4798	7.52269	7.54548	7.17242	7.13285	7.17574	7.36928
PPP1R12B	7.21573	7.19932	7.15024	7.20111	7.22154	7.25408	7.25863
SH3PXD2A	4.62912	4.32532	4.27628	4.32736	4.1433	4.47182	4.47765
ANPEP	7.13677	7.18391	7.10236	7.66103	7.56193	7.68854	7.43708
CLN6	8.50499	8.54396	8.44961	8.47519	8.49372	8.33892	8.35091
SAR1A	10.0637	10.064	10.1821	10.5284	10.4503	10.5311	10.292
AHNAK2	8.40575	8.40564	8.28326	8.66199	8.66571	8.62134	8.60568
MAFG	9.44363	9.44189	9.38527	9.40434	9.47531	9.39955	9.1048
PCSK1N	8.60872	8.63103	8.55009	8.85266	8.97552	8.79548	8.70396
CDC42EP4	9.35139	9.37276	9.32053	9.45188	9.45921	9.42663	9.12109
HARS	10.0249	10.0862	10.0196	10.1368	10.1044	10.107	9.7313
COG4	9.21769	9.23776	9.18091	9.04829	9.00017	9.01303	9.03098
LANCL1	7.88544	8.01337	7.79252	7.09584	6.99765	6.83259	6.82071
PTPN1	9.64776	9.66925	9.64291	9.51476	9.5342	9.46574	9.06592
C11orf31	10.7782	10.745	10.7334	10.8233	10.8409	10.8628	10.362
USB1	7.89079	8.08267	7.89995	8.24416	8.28014	8.2145	8.31928
APMAP	9.7596	9.77977	9.70669	9.60108	9.58107	9.62065	9.74809
PLAU	9.5449	9.65338	9.48611	10.4848	10.5422	10.4917	10.716
NME1 /// NME1-NME2	12.6517	12.6553	12.6184	12.7134	12.7073	12.7082	12.7938
ACP1	11.4707	11.4788	11.5347	11.3998	11.3897	11.3987	11.3847
ZNF593	9.60708	9.53286	9.39679	9.3597	9.46585	9.48174	8.95122
NDUFB3	8.89483	8.81871	8.84596	8.68115	8.65831	8.74334	8.57623
CLTA	11.7057	11.6402	11.6364	11.3694	11.3607	11.3676	11.6003
RRAS	9.69524	9.75704	9.6237	10.2389	10.3008	10.2204	10.2326
SLC29A1	8.45858	8.53252	8.33387	8.26262	8.27299	8.16092	8.28602
CDC20	10.9543	11.0018	10.879	10.2012	10.1687	10.1908	10.3011
RANGAP1	9.65083	9.78174	9.58729	9.29963	9.33347	9.29122	9.28986
KDM2A	7.11154	7.1427	7.01149	7.24362	7.21674	7.18446	7.40337
PER1	5.16338	5.22151	5.15517	5.28049	5.64933	5.41628	5.29642
TRPC4AP	9.11074	9.13367	8.98177	9.13249	9.12096	9.08291	8.70422
BCL2L2	8.90977	8.93149	8.68216	8.33892	8.4034	8.38353	8.06685
RNF31	7.23869	7.128	7.15422	7.01811	7.20046	7.11851	6.85481
ABL1	8.76884	8.75884	8.6369	8.91208	8.92652	8.95628	9.30403
SNX27	8.70429	8.77942	8.74256	8.90927	8.87711	8.86458	8.81705
STAT5A	5.97921	5.7808	5.99427	6.71441	6.45917	6.53622	6.73909
EDC4	8.89333	8.93687	8.72551	8.42762	8.53181	8.54927	8.67167
OCRL	7.86171	7.82741	7.78386	7.44961	7.60321	7.53081	7.72981
PDS5A	9.37662	9.29687	9.3729	8.74076	8.745	8.83637	8.58339
GTPBP2	7.78094	7.88643	7.89153	8.10865	8.03686	8.02132	8.30596
MEF2D	5.76244	5.65591	5.65591	5.62825	5.56005	5.71905	5.3632
DNAJA1	11.1298	11.1529	11.1705	11.3013	11.2454	11.2719	10.7989
TXNIP	4.68807	4.37918	4.57719	4.91306	4.89593	4.6561	5.13539
TNNC2	5.11349	4.71774	4.8224	4.83429	4.77041	4.74007	5.05542
OST4	11.5338	11.5067	11.3991	11.627	11.6202	11.6612	11.9453
RAB5B	9.02133	8.90877	8.84845	8.8602	8.86167	8.80623	8.52159
MEST	9.68591	9.67873	9.67383	10.0486	10.0393	10.0938	10.4646
SCFD1	9.89994	9.84284	10.0235	10.3161	10.2582	10.409	10.4087
MRPL14	10.3576	10.2964	10.1736	10.3529	10.3149	10.3399	10.0491
POLR1D	9.51546	9.43394	9.40756	9.73097	9.73428	9.72188	9.88595
DPM2	9.59738	9.60886	9.52425	9.05466	9.00802	9.20202	9.1236
DNTTIP1	8.86509	8.8243	8.67147	8.72193	8.70953	8.5992	8.48879
NDUFA4L2	5.72427	5.62197	5.75785	5.7229	5.7229	5.71033	5.63113
SEL1L	7.7465	7.77113	7.71137	7.9143	7.98626	8.0542	8.31254
RSAD1	9.35116	9.36721	9.21686	9.05718	9.17625	9.06006	9.5579
GOLGA2	8.49234	8.58719	8.51212	8.64072	8.57681	8.56129	9.00705
RXRB	6.84342	6.92329	6.76139	6.54328	6.41321	6.48377	6.47191
NEO1	7.03906	7.039	7.01494	6.85897	6.94139	6.79434	6.84015
NSMAF	10.1293	10.0744	10.2558	9.81345	9.76133	9.90355	10.0327
ATP9A	7.85809	7.79677	7.68449	7.78727	7.83579	7.71975	8.2252
STK10	6.21478	6.3289	6.5695	6.80235	6.81973	6.6381	6.46335
NFIB	8.95826	8.88725	9.14272	7.99093	7.99096	8.02776	7.60828
PPP3CB	9.20778	9.31671	9.26356	9.64186	9.65784	9.72988	10.0594
EXTL3	6.67701	6.62509	6.71638	6.49173	6.47526	6.35735	6.58128
CBFA2T2	7.7552	7.76978	7.71226	7.68048	7.7265	7.67366	7.90745
CDR2 /// LOC101060399	8.29632	8.38951	8.34753	8.25051	8.20077	8.39123	8.58844
EP400	7.26569	7.33502	7.34292	6.80036	6.80689	6.73666	6.76694
PNLIPRP2	3.45467	3.72002	3.34339	3.74767	3.69583	3.55226	3.56932
MKLN1	8.59333	8.54828	8.45358	8.94596	8.95152	8.97734	8.88494
RPS7 /// RPS7P1	13.8664	13.8599	13.899	13.9288	13.9318	13.9534	13.8073
AMD1	11.2058	11.2337	11.278	11.2694	11.2584	11.2859	11.1908
RBBP4	10.1955	10.2142	10.164	9.89006	9.83722	9.98898	9.7129
MAEA	10.3163	10.3637	10.3103	10.4505	10.4681	10.4902	10.6047
YTHDF2	9.5012	9.51595	9.54481	9.02779	9.02554	9.01855	8.93247
LSM4	11.0237	11.0777	10.9318	10.7213	10.6964	10.7046	10.824
EIF1B	9.66793	9.80406	9.76361	9.19957	9.07288	9.13195	9.46952
SARAF	10.8342	10.8574	11.0138	10.8505	10.8261	10.9012	11.0989
MRPL20	11.2526	11.3114	11.2621	11.2378	11.1982	11.2377	11.4973
NAE1	11.7137	11.7245	11.7154	11.4787	11.4665	11.5198	11.5002
NDUFB11	10.8815	10.8486	10.7031	10.8246	10.8513	10.8366	10.5978
PRM1	4.71258	4.45259	4.54436	4.5169	4.63378	4.7318	4.19803
HSPA4	11.0051	10.9658	11.0785	11.0982	11.0108	11.17	11.0392
PIM1	7.1102	7.34419	7.24914	7.58272	7.5487	7.59732	7.16689
STX5	7.10857	7.01059	6.9356	7.1558	7.13411	7.17846	7.1134
CCDC142 /// MRPL53	10.9021	10.8921	10.7827	10.7039	10.675	10.68	10.6738
AMFR	9.83809	9.8116	9.74047	9.64549	9.60324	9.57162	9.12632
C7orf50	10.1212	10.1345	10.0555	9.40068	9.47758	9.50373	9.2723
ATPAF1	7.72701	7.77574	7.59842	7.84482	7.70048	7.80239	7.71027
CAMK2G	7.12082	7.24308	7.03421	6.75328	6.76836	6.69986	6.26525
FPGS	8.21733	8.31898	8.22531	8.19862	8.14578	8.06945	7.8821
SNAPC2	6.99812	6.85472	6.7411	6.71449	6.80512	6.7769	6.48375
PRAME	10.1161	10.138	10.1218	10.1588	10.1725	10.1576	9.84649
COL5A1	8.14366	8.15341	7.94363	8.68728	8.71145	8.72386	8.70684
MAPK14	9.32816	9.40312	9.23477	8.59417	8.6042	8.61506	8.50045
THRAP3	6.62749	6.60796	6.57352	6.33627	6.36672	6.39666	6.11694
URM1	5.58106	5.70856	5.68416	5.75387	5.83219	5.61346	5.8091
ASAP1	8.20286	8.27775	7.98817	8.78282	8.78372	8.7897	9.01298
WASL	8.62823	8.6379	8.49743	7.61517	7.57081	7.46898	8.07567
HLTF	9.57208	9.55403	9.59703	9.29766	9.29736	9.39616	9.29823
POGZ	7.36995	7.37555	7.31901	7.32461	7.31565	7.40129	7.35329
PI4KA	8.45451	8.54103	8.40906	8.36614	8.42405	8.24615	8.00023
YTHDF3	8.66243	8.64754	8.5399	8.80043	8.79019	8.83649	8.65912
SQSTM1	12.7364	12.7496	12.8915	13.224	13.1791	13.1873	13.4869
MAP2K1	9.62198	9.58719	9.50703	9.54722	9.55036	9.48272	9.77309
JAM3	5.61174	5.68654	5.53351	5.51204	5.60843	5.51401	5.87086
SRSF7	12.1635	12.1763	12.1166	11.7457	11.7751	11.7957	11.578
APOD	5.73589	5.68336	5.74991	5.91508	5.97231	6.10814	5.85923
LRPPRC	10.8158	10.8309	10.7859	11.1035	11.0989	11.1683	10.8112
HLA-DPB1	4.68521	4.61658	4.65581	5.01321	4.9202	5.08208	4.48271
TACSTD2	4.15042	4.05282	4.19356	4.30735	4.29783	4.29931	3.96864
PDAP1	5.29134	5.64387	5.50692	5.36162	5.32774	5.3036	5.24546
ADIRF	5.52995	5.6042	5.58953	5.75351	5.89273	5.82734	6.15369
IARS2	11.0383	11.0502	11.076	10.8198	10.8178	10.8445	10.4569
WDR75	8.46458	8.63535	8.664	8.89427	8.80896	9.04246	9.24902
GNL3	10.2712	10.1944	10.1739	9.74789	9.72069	9.72497	9.71276
FBXO7	9.99168	10.004	9.93286	9.96984	9.9654	9.89509	9.93499
IKBKAP	4.91388	5.06664	4.81157	4.21125	4.01655	4.20584	3.67622
HAUS1	10.0225	10.0021	9.99287	9.27813	9.23866	9.24009	8.77792
DTD1	11.0118	11.0158	10.981	10.7316	10.7582	10.7769	10.5013
GPAT4	9.56896	9.567	9.50497	9.43057	9.35635	9.42461	9.23194
SEC24D	6.66471	6.72949	6.80897	6.8874	6.726	6.81532	6.36617
OAF	7.67619	7.69079	7.62536	7.9404	7.96058	7.98212	8.10116
UPF1	7.51512	7.58442	7.44653	7.1193	7.28455	7.1245	7.014
EZH1	4.18898	4.63496	4.25554	4.48737	4.08294	4.54457	4.25304
NUDT16L1	8.40541	8.30829	8.29626	8.25955	8.23851	8.22862	7.84785
KLF9	6.11097	6.29602	6.30016	7.46472	7.37232	7.40448	7.74668
BMS1	9.09149	9.07505	8.81272	8.94651	9.00223	9.00338	9.03843
HACD2	7.40243	7.44903	7.4756	6.53032	6.54238	6.50674	6.52144
HMGXB3	8.18561	8.33243	8.21932	8.14142	8.15487	8.03559	8.21262
TRIM27	8.58274	8.67256	8.62823	9.2271	9.21774	9.17465	8.74089
RBM6	7.85618	7.94731	7.76096	7.63269	7.51048	7.65609	7.9493
ITGB2	6.15231	6.15162	6.04738	6.18713	6.24703	6.26245	5.93758
CUX1	9.09551	9.2502	9.26062	9.50229	9.47369	9.48037	9.90084
SORD	8.98579	8.95517	8.98193	8.91816	8.91463	8.94477	9.3868
PTGFRN	6.94471	7.04758	6.94961	5.73587	5.86377	5.449	6.16098
SUPT4H1	9.47323	9.37182	9.16332	9.1571	9.15976	9.08895	9.41196
FOSB	7.72772	7.56608	7.84958	7.79893	7.79367	7.84977	7.86167
ADD3	6.4163	6.37917	6.40313	6.56372	6.50055	6.52769	6.53454
RBP1	5.06092	5.20956	5.05179	4.7453	4.36157	4.42558	4.60555
NCAPH2	8.98959	9.03878	8.93877	8.40352	8.40637	8.56336	8.8062
RPRD1A	8.17074	8.20856	8.32703	7.86292	7.85884	7.997	7.96411
EAPP	8.98719	8.98317	8.82911	8.73006	8.73739	8.77406	9.14871
PCBD1	10.7991	10.8436	10.7231	10.6366	10.6391	10.6253	10.5392
FEZ1	4.89038	4.75818	5.00996	5.34187	5.21384	5.28456	5.62448
RTF1	9.0089	8.99465	8.92321	8.88738	8.84458	8.9082	8.8896
GCN1	9.74508	9.76078	9.65248	9.76918	9.76799	9.71916	9.31195
GPC1	9.40186	9.41241	9.33595	9.73059	9.79649	9.71745	9.45077
C9orf69	9.15551	9.19456	9.25788	9.43541	9.43541	9.43725	9.64997
BCL2L12	10.3753	10.4433	10.3443	10.254	10.2395	10.2646	9.95686
SNTA1	6.53917	6.54627	6.35269	6.62421	6.75796	6.58308	6.45595
ZC3HAV1	9.0015	9.09177	9.01161	8.56721	8.60771	8.58612	8.16509
ARSD	5.77798	5.89094	5.56737	6.23007	6.41318	6.21741	6.73419
CHD1L	9.85988	9.95292	9.87281	9.82795	9.81385	9.84569	9.84771
DNAJC3	5.72113	5.77854	5.54678	5.89613	5.81889	5.84662	5.76048
SLC25A25	7.78684	7.68036	7.66286	7.99093	7.93439	8.04237	7.7393
SRPRB	10.147	10.1739	10.1066	9.10009	9.10241	9.05396	9.51661
PUF60	11.4901	11.5163	11.3683	11.5285	11.5582	11.5982	11.4715
FOPNL	9.57102	9.64153	9.58435	9.37048	9.3044	9.35866	9.33033
RNF34	9.44645	9.37482	9.25235	9.08577	9.02536	9.03254	8.83679
MT1G	7.25564	7.23276	7.30708	7.33191	7.33191	7.32768	7.59458
2011-09-01	9.62885	9.51129	9.60923	9.16808	9.15092	9.08601	9.09262
LSM2	10.6263	10.5916	10.4749	10.082	10.1126	10.0631	10.1583
HMCES	8.71639	8.68935	8.72748	8.25063	8.23148	8.18656	7.87741
FN3KRP	9.87236	9.87534	9.78383	9.47193	9.56602	9.49053	9.12937
ARIH2	8.65613	8.58125	8.48205	8.88816	8.88294	8.86787	8.84543
CHTF8	10.0196	10.0018	9.97334	10.2348	10.2072	10.1488	10.5373
DDB2	9.00116	9.08509	9.02579	9.7492	9.72095	9.62752	9.28273
ZNF212	7.71022	7.74456	7.67787	7.75646	7.76128	7.70418	7.62874
TIPARP	8.34447	8.4565	8.42339	9.70996	9.66771	9.71387	9.70218
FAH	9.42961	9.44262	9.35826	9.90266	9.86232	9.88026	9.98181
ARF6	11.1027	11.1254	11.1061	11.168	11.1367	11.1732	10.9495
SCAMP3	10.6421	10.6945	10.5466	10.4691	10.4464	10.4918	10.322
TDP2	9.02011	9.05282	9.09774	9.33993	9.22711	9.34199	9.68701
FAM120AOS	8.74892	8.74254	8.70332	8.34681	8.37998	8.41265	8.54213
RPP25L	9.82755	9.81386	9.76575	9.82025	9.89278	9.86084	9.42831
SH2B3	5.85304	5.72582	5.88785	6.1932	6.08661	6.06504	5.91306
ANO6	9.57015	9.50573	9.5166	9.41566	9.41812	9.43238	9.11898
WIPI1	7.1763	7.22402	7.18611	7.46581	7.52811	7.49435	7.58302
MLST8	9.1945	9.28792	9.11733	8.20831	8.25606	8.17538	8.54319
RHOU	6.12442	6.25042	5.95134	7.12422	7.27561	7.24583	7.34517
DNAL1	6.5355	6.32118	6.19979	5.90787	5.93079	5.88571	6.08116
SLC35A2	9.36912	9.1466	9.34236	9.61038	9.55659	9.6397	9.49302
RBM8A	9.12308	9.16186	9.14202	8.77105	8.70145	8.78477	8.65161
CHMP3 /// RNF103-CHMP3	10.3898	10.4445	10.3463	10.8003	10.7923	10.8334	10.7744
GNB1	10.5344	10.5421	10.5222	10.1765	10.1352	10.2592	9.66595
PRDX5	11.549	11.5072	11.4662	11.5386	11.5569	11.5104	11.1771
COX7A1	5.26561	5.25344	5.09957	5.12625	5.29758	5.17607	5.53359
SNRPD3	11.4551	11.4796	11.4419	11.3109	11.3152	11.3007	10.894
ECHDC1	9.38095	9.4445	9.54673	8.36702	8.25958	8.34873	8.78834
CDCA7L	8.28367	8.2786	8.20026	7.50778	7.54815	7.43567	7.66656
TOP1	10.3736	10.3816	10.3708	10.6798	10.5951	10.7428	10.2035
FMO4 /// TOP1 /// TOP1P1	8.61866	8.61111	8.52483	8.77363	8.75356	8.85234	8.94565
EPS8	9.75526	9.77225	9.89916	10.5042	10.5281	10.5306	10.0684
ARFGAP3	9.01576	8.91526	9.19203	9.40016	9.33566	9.41825	8.89912
JAGN1	10.3913	10.4241	10.3028	10.8559	10.8501	10.8744	11.302
BYSL	9.48688	9.55357	9.45832	9.40717	9.42652	9.47801	9.75283
DHPS	8.75391	8.80506	8.65587	8.12033	8.13688	8.14259	8.41427
DSTN	13.4674	13.4327	13.5502	13.2674	13.2722	13.3054	12.8197
MRPS2	10.2011	10.162	10.1347	9.63371	9.64252	9.63468	9.70088
ASCC2	7.48737	7.53571	7.48146	7.03232	7.06982	7.15181	6.70384
NEK7	5.95381	6.0854	5.72155	5.08877	4.88506	4.80989	5.01768
SPOCK2	5.76693	5.68443	5.48333	5.58484	5.78237	5.62319	5.28001
NLGN2	7.11363	7.1715	7.30405	7.32354	7.23648	7.20389	7.61006
MRPL39	9.4391	9.47167	9.40563	9.67534	9.6252	9.68563	9.27972
CHPF2	8.18868	8.2127	8.13964	8.71775	8.80304	8.64741	8.55616
NSUN2	10.3092	10.3673	10.2347	10.1093	10.0844	10.1816	10.2262
LXN	7.58209	7.5255	7.47403	8.17756	8.15046	8.28199	8.53446
NFAT5	7.52536	7.49636	7.49805	7.98274	8.06583	8.02574	8.01908
TTC38	6.66303	6.81671	6.67276	6.48293	6.39281	6.46869	6.09765
EPT1	5.76753	6.05208	5.92942	5.97405	6.04437	5.94687	6.33703
PRKCA	6.62493	6.80483	6.86904	6.60177	6.66948	6.69429	6.26933
IGFBP1	7.66623	7.77478	7.79306	7.81628	7.90639	7.83177	7.48278
CHGB	5.18343	5.43761	5.33786	5.59722	5.67238	5.49823	5.91852
LAMP2	8.46811	8.41883	8.45485	8.08813	8.07933	8.1452	8.07101
FKBP10	8.34051	8.41488	8.22647	8.43516	8.45213	8.56738	8.91447
PDHA1	9.03665	9.03755	9.04218	8.97382	8.97943	9.03357	9.10966
MYDGF	10.1048	10.0959	9.95473	9.97068	9.9574	9.94045	10.2612
HARS2	8.67613	8.5351	8.50548	8.49111	8.37291	8.42663	8.68274
CORO1B	7.82722	7.79061	7.66714	7.72126	7.7295	7.71703	7.40812
SEPT5 /// SEPT5-GP1BB	6.8814	6.89229	6.77523	6.97088	6.89643	6.97512	6.91762
TDRD3	6.34321	6.27014	6.3021	6.45605	6.51419	6.46954	6.29768
DYNLRB1	10.3186	10.2412	10.1473	10.2078	10.2481	10.1702	10.4262
SSNA1	10.0041	10.0154	9.88857	9.48638	9.53148	9.4708	9.68434
TMEM129	6.96056	6.63316	6.84288	6.82602	6.91439	6.75451	7.07704
IMPA2	10.0601	10.172	10.0353	9.63194	9.62495	9.6311	9.99036
SLC25A36	9.01177	8.99062	8.98085	8.96723	8.98419	9.00108	9.30401
CTSF	7.12886	7.10635	7.02948	7.35131	7.35759	7.32211	6.95991
HAGH	8.8728	8.94749	8.83154	9.08254	9.0162	9.03515	9.20522
NUB1	7.56629	7.63061	7.56749	7.35014	7.29921	7.32914	7.04472
CANT1	9.71743	9.78273	9.73971	9.85885	9.83395	9.89299	9.72285
TRAM2	7.09882	6.97647	6.95804	7.17285	7.02163	7.11191	7.47105
IRF4	4.5248	4.97874	4.99191	5.00586	4.84046	5.00355	4.4691
EXOSC10	8.96271	8.95607	8.79103	8.69435	8.75144	8.6419	9.14825
UTP4	10.5159	10.4669	10.4183	10.4408	10.4263	10.4621	10.8153
2008-09-01	7.52857	7.544	7.55938	7.34393	7.18899	7.32087	7.14197
ANXA1	13.0609	13.0756	13.0676	13.3774	13.3345	13.3705	12.9457
HSD17B10	10.7863	10.7755	10.6632	10.4584	10.4553	10.4818	10.7223
EFHD1	5.63235	5.48588	5.25363	5.90265	5.95159	5.95448	5.9283
REXO2	10.376	10.3579	10.412	8.67271	8.70754	8.74909	8.45786
OCIAD1	11.4744	11.5172	11.5305	11.6805	11.6675	11.6769	11.8972
PDXDC1 /// LOC102724985	9.81848	9.82697	9.80887	9.62685	9.49477	9.62384	9.21633
PTTG1 /// PTTG3P	11.5035	11.4916	11.4183	10.9844	11.0447	10.995	10.8709
TMEM50B	7.39852	7.59611	7.47329	7.38097	7.25833	7.38027	7.66248
RDX	9.18566	9.24486	9.0269	7.78191	7.8187	7.97089	7.59227
SLC25A20	7.21941	7.23263	7.27943	7.44656	7.43653	7.4285	7.57524
UBA2	10.6645	10.6649	10.997	10.841	10.7879	10.8719	10.5156
MAN2A2	6.08658	6.23726	6.34152	6.32401	6.21223	6.30689	6.37957
TMEM259	7.89343	7.9451	7.77495	7.88847	7.95888	7.99513	7.90588
VEGFB	9.62631	9.72779	9.61899	8.63148	8.55475	8.64984	9.01655
RYBP	8.07754	8.17848	8.10445	7.84159	7.93237	7.92259	7.93624
WRNIP1	9.27903	9.36036	9.28067	9.35079	9.34626	9.31577	9.76764
NFKB1	8.633	8.65982	8.56396	8.95147	8.93095	8.94372	9.15212
MAPK3	8.60417	8.55078	8.45171	8.45972	8.44051	8.41759	8.8544
POLR2A	8.9878	9.04233	8.97736	8.6423	8.68488	8.65195	9.06153
MRPS5	9.71339	9.69137	9.62014	9.13774	9.0728	9.23813	8.84619
MPRIP	10.3282	10.3412	10.1733	10.0363	10.0445	10.0487	9.6101
INTS12	8.25729	8.31062	8.18569	8.20385	8.09659	8.1544	7.65421
BTBD10	9.39059	9.32104	9.40229	9.10053	9.16237	9.13493	8.91723
LOXL1	4.81295	4.70595	4.68596	4.65014	4.67886	4.90252	4.16591
FNBP1L	9.10156	9.22992	9.24414	8.72216	8.67403	8.70561	8.51705
DERL2	10.3578	10.2943	10.3568	9.97933	9.9677	9.93705	9.60525
SETD7	5.0238	5.1256	5.02119	4.42452	4.31093	4.42231	4.5236
POM121 /// POM121C /// POM121B	6.45829	6.426	6.60515	6.50934	6.34312	6.45091	6.43771
POM121 /// POM121C	10.1558	10.1443	10.0511	9.74581	9.74366	9.72932	9.76161
ABLIM1	9.74326	9.77115	9.72029	9.45334	9.48909	9.45069	9.53835
SLCO2A1	5.93688	5.89125	5.95071	6.12496	6.174	6.1648	6.51035
DTX3L	7.37637	7.28113	7.16046	7.8278	7.91164	7.91088	8.00171
EMP1	5.92106	6.01684	5.94415	5.42364	5.5642	5.42106	5.65772
NQO1	13.5133	13.5272	13.502	13.7044	13.6869	13.6827	13.3442
HTN1	2.89827	2.95844	2.82549	2.80293	2.79099	2.88008	3.0429
MYH7	4.1673	3.9738	4.03673	4.1785	4.2349	4.31136	3.89017
CPSF3	10.5505	10.5166	10.4485	9.81914	9.73352	9.81664	9.52496
NECAP1	8.74111	8.76622	8.67428	8.80952	8.89816	8.88973	8.91717
PFN1	13.1374	13.1435	13.1356	12.9579	12.9472	12.9976	13.13
PPP1R3C	7.36256	7.55432	7.30745	7.81719	7.80512	7.78252	7.81943
SFN	10.4992	10.4253	10.2486	10.7434	10.7952	10.7149	10.6258
VPS26A	9.60127	9.64727	9.84731	10.0019	9.94952	10.0189	10.0511
CD52	3.37904	3.2777	3.1421	3.29575	3.3512	3.67501	3.31205
RGCC	4.7024	5.18701	5.08742	6.4985	6.30117	6.13529	5.94052
VAPB	9.5312	9.47302	9.5051	9.63097	9.62479	9.64186	10.0067
PSMD10	10.5404	10.6603	10.6044	10.3454	10.3471	10.3987	10.3898
SCAP	8.90106	8.8268	8.78012	8.5762	8.58063	8.53193	8.9271
GC	3.1252	3.25614	3.21544	3.38153	3.33435	3.31209	3.23881
CLPP	9.81325	9.77558	9.66908	9.43133	9.45217	9.43071	9.29862
EXOSC8	10.1456	10.0764	10.0351	9.57944	9.59768	9.68441	10.0203
CNOT1	9.2617	9.28434	9.27872	9.53093	9.51465	9.44956	9.99965
CENPB	8.67341	8.71951	8.67678	8.5665	8.76991	8.61139	8.82233
ELF3	11.088	11.0869	11.0139	10.2811	10.2447	10.2251	10.0687
GNAS	12.5977	12.5996	12.4959	12.5027	12.5316	12.5071	12.1398
SMPD1	6.92827	6.89229	6.88396	6.92171	6.91882	6.78095	7.39575
SLC20A2	6.81752	6.63389	6.54796	7.31476	7.30188	7.32606	7.48968
SECISBP2	7.81227	7.77232	7.54529	8.4024	8.40729	8.53021	7.98539
TRIP4	8.48583	8.56358	8.57377	8.65394	8.63685	8.53812	8.22887
FHOD1	5.23936	5.26734	5.39468	5.33635	5.31439	5.11973	5.58411
VMA21	6.05983	6.01403	6.03242	5.02871	4.89658	4.79686	4.84705
MEN1	8.92195	8.86106	8.78831	8.7708	8.69232	8.73825	8.94267
SUCLG2	9.43315	9.38334	9.363	8.9237	8.94337	8.82211	8.48404
MAST2	6.16144	6.31775	6.34484	6.45597	6.30944	6.30621	6.11525
KLHDC8B	7.30533	7.20417	7.22682	7.4944	7.49755	7.51528	7.68356
KIF13B	7.13134	7.07804	7.06564	6.84672	6.82178	6.6829	6.79498
OXSR1	7.53749	7.53749	7.39336	7.48226	7.44381	7.40071	7.48833
PXN	8.17621	8.07231	8.11202	8.38541	8.39224	8.37792	8.57646
EPHA2	9.59268	9.61892	9.60557	9.52516	9.46174	9.50775	9.0411
LSS	7.20671	7.20055	7.08232	6.6588	6.57732	6.5664	6.50418
FOXN3	6.30907	6.30194	6.28263	6.19755	5.96625	6.06349	6.33582
SUCO	8.12165	8.14063	8.21935	7.18796	7.16482	7.19991	6.9398
TBL2	7.66531	7.87516	7.8184	7.26262	7.33304	7.22384	6.91093
NDUFC2	11.8142	11.8203	11.6688	11.5554	11.587	11.5835	11.4418
BIRC2	9.75244	9.70229	9.67026	10.2837	10.2294	10.1395	10.0894
KIF1BP	10.2467	10.2897	10.3697	9.84949	9.81505	9.85744	9.38604
KLHL9	9.11357	9.18013	9.08397	9.08164	9.10229	9.13212	8.87562
COX6C	12.3803	12.391	12.45	12.4569	12.4202	12.4437	12.0066
MLH1	9.47541	9.4429	9.3285	8.98689	9.04594	8.9937	9.1586
RHOG	9.69444	9.67783	9.68863	9.75928	9.78784	9.71669	9.62977
SDC4	8.55053	8.64267	8.572	9.54532	9.517	9.57262	9.95703
UBE3A	8.79571	8.86456	8.91027	8.89579	8.95957	8.97908	8.89324
CSTF3	10.037	10.076	10.0909	10.7144	10.6765	10.6704	10.7451
MRPL24	11.4798	11.4464	11.3456	11.1007	11.1166	11.079	11.3876
GPR107	8.59384	8.61013	8.50854	8.45617	8.4658	8.50492	8.76962
MCMBP	10.2446	10.2573	10.3263	10.1173	10.0219	10.1411	10.1104
SMG9	7.89397	7.72315	7.64616	7.3979	7.47828	7.54386	7.02025
SPRY1	6.72736	6.63442	6.70775	6.93917	6.8673	7.08702	6.52786
GIT1	6.9698	6.92903	6.81493	6.8394	6.94771	6.78354	6.44979
MTCP1 /// CMC4	8.26268	8.22015	8.21182	7.66218	7.65357	7.66041	7.64787
SPRED2	6.18418	6.32154	6.21549	6.27525	6.05353	6.22572	6.13983
EZH2	9.22198	9.17638	9.38489	8.54294	8.49013	8.65185	8.5481
CD109	10.0735	10.065	10.0185	10.2184	10.249	10.2853	10.4601
PPP1R16B	5.08871	4.97874	5.08646	5.2172	5.02185	5.12056	5.17917
PIEZO1	8.78815	8.89368	8.70136	8.83664	8.88437	8.84834	9.12983
KLHL12	8.03411	7.97187	7.91185	7.64673	7.81458	7.72594	8.14811
TSPYL4	7.18086	7.22479	7.1937	7.33046	7.40905	7.42206	7.7919
POLA2	8.93611	8.85294	8.66126	8.37863	8.31844	8.26164	8.2986
POLR2K	10.6611	10.6284	10.5949	10.5511	10.6512	10.6559	10.9188
IWS1	8.53447	8.54199	8.4825	8.20873	8.19572	8.22862	8.00444
NDUFB6	11.3869	11.3538	11.4352	11.3007	11.242	11.3202	10.9573
SF3B6	11.5235	11.5341	11.6147	11.7483	11.7478	11.8415	12.0867
ENPP2	3.1688	3.28967	3.10342	3.3639	3.50705	3.37449	3.31002
EIF2B2	10.3157	10.3587	10.2284	10.3676	10.3495	10.41	10.7077
SLC39A3	8.69649	8.67878	8.60006	8.69509	8.67708	8.62315	8.35981
CYFIP2	8.42	8.37949	8.2273	8.66597	8.73554	8.76092	8.46901
AVPI1	10.3458	10.3281	10.2383	10.1232	10.1425	10.1369	9.87482
UNC13B	7.46483	7.54493	7.58945	7.79769	7.80726	7.74999	7.922
GNA13	10.0435	10.0077	10.1274	10.441	10.3964	10.5246	10.4971
MICU2	9.89437	9.93198	10.0762	10.2638	10.1816	10.3345	9.82879
RBM15B	7.21664	7.14539	7.11707	6.89977	6.71496	6.39719	6.37086
JAK1	10.566	10.572	10.3769	11.0729	11.0612	11.1126	11.2413
RNF19A	7.97765	8.14651	8.02465	8.19765	8.17583	8.23274	7.77005
MED27	8.59934	8.56397	8.42203	8.27427	8.2373	8.20888	8.7193
ANKRD13A	7.26772	7.45972	7.3258	6.7923	6.82907	6.74654	6.45039
CEBPG	10.2329	10.2394	10.112	9.20484	9.28112	9.22375	9.45732
TYSND1	6.82715	6.94589	6.9308	7.55273	7.45499	7.38605	7.24721
ARIH1	9.29684	9.22298	9.26263	9.04217	9.10972	9.00122	9.4004
DCAF8	7.10692	7.2214	7.31728	7.48127	7.42611	7.3378	7.12229
RB1	7.49234	7.51015	7.67802	7.91878	7.86902	7.98908	7.68208
KIFC3	10.5557	10.5477	10.6176	10.6587	10.5551	10.6151	10.5297
VPS13D	7.12938	7.13517	6.92244	6.77644	6.84446	6.82246	6.72997
PTPN18	6.49735	6.43672	6.45741	6.17171	6.14524	6.1886	6.50327
LPCAT4	8.58839	8.41562	8.32687	8.41673	8.31757	8.32516	8.73448
MTFP1	8.97838	8.9964	8.89076	7.72288	7.903	7.81885	7.38552
SDHAF1	9.11233	9.16695	8.97347	8.41473	8.43584	8.44371	8.72386
PALM	7.444	7.38277	7.30755	7.3198	7.59366	7.33065	7.83885
CHST10	7.67059	7.55074	7.37232	7.45402	7.48076	7.42542	7.71899
FNDC3B	8.2912	8.28722	8.30641	8.80006	8.79074	8.88816	8.52785
ST6GAL1	4.89943	4.89943	4.93873	4.86247	4.82508	5.19805	4.66096
ASAH1	9.63538	9.60941	9.71335	10.0585	9.96235	9.97142	9.64262
RAB1A	8.03223	8.13235	8.28567	8.25911	8.20437	8.30266	8.21335
HN1	11.9648	11.9929	11.8887	11.8656	11.8845	11.8646	12.343
HSPB7	4.85014	4.7437	4.91149	4.93963	4.89479	4.85892	4.92467
SQLE	9.88639	9.75704	9.89602	10.0753	10.0611	10.0503	10.1354
PFKFB3	12.0005	11.9739	12.0193	12.209	12.2247	12.2379	12.1361
ZCCHC24	6.97935	7.08511	6.96304	7.53563	7.53523	7.45827	7.70978
PCYOX1	7.83832	7.65506	8.09752	8.18944	7.97194	8.18141	7.82542
FUCA2	10.2497	10.303	10.3898	10.1532	10.0999	10.1819	9.73574
GPRC5C	8.81167	8.86912	8.76191	9.28689	9.34227	9.32688	9.55681
ACOT7	10.0394	10.1781	10.0142	9.8665	9.87	9.83329	9.76124
2006-03-01	7.73861	7.83085	8.01006	7.80527	7.85966	7.80372	7.85041
MCTS1 /// MCTS2P	9.20976	9.18758	9.33314	9.34642	9.27964	9.44113	9.30429
MCTS1	11.3652	11.2933	11.3799	11.3884	11.3714	11.3811	10.938
CD320	9.10085	9.04409	8.91796	8.62154	8.64218	8.61285	8.46096
HUWE1	9.24106	9.20253	9.12327	9.04052	9.05215	9.02203	9.04748
SEC14L1	7.9504	7.87368	7.88871	8.23136	8.16176	8.18796	8.3179
RALA	9.16006	9.22658	9.06215	9.14579	9.04206	9.06103	9.15009
NDUFV1	9.79724	9.81348	9.76876	9.53857	9.54537	9.4846	9.13237
GMFG	3.21088	3.38501	3.01739	3.41738	3.2336	3.27534	3.29048
G6PC3	8.67606	8.76728	8.5742	8.72522	8.79277	8.72872	9.03628
CPVL	6.12568	5.9099	5.98225	6.05835	6.12072	6.16054	5.62975
MGLL	9.26308	9.24226	9.16313	8.11442	8.2501	8.24521	8.01109
ATMIN	9.34785	9.33764	9.23923	8.68709	8.68096	8.61931	8.30785
PDE6G	6.81356	6.78108	6.84288	7.268	7.01574	7.19862	6.95965
CTR9	9.16485	9.10962	9.17552	9.24889	9.19283	9.3228	9.02772
LCMT1	8.88154	8.85474	8.69595	8.48361	8.43585	8.49078	8.38262
OTUB1	9.93886	9.97249	9.7889	9.44466	9.42219	9.37418	9.62881
THRA	8.70003	8.68285	8.57979	8.01248	8.00258	7.99701	7.62908
PLEKHB1	5.33262	5.3525	5.54967	5.46499	5.5724	5.53971	5.59754
GYPC	4.85453	4.99374	4.98401	5.18064	5.104	5.06916	4.84354
KIF1C	9.07041	9.23876	9.12546	8.31229	8.28764	8.26553	7.87286
USP15	8.43872	8.56632	8.60959	9.01637	8.97021	9.13344	9.04802
DHX35	7.68388	7.79306	7.62994	7.34965	7.45281	7.33566	7.24132
PHF5A	9.80466	9.84657	9.81579	9.61128	9.70575	9.65204	9.3178
THYN1	7.42336	7.58024	7.45027	7.1237	7.17477	7.20861	7.30874
CLUH	7.20417	7.30124	7.16032	7.0348	6.97194	7.04719	7.10736
AAR2	8.91619	8.87024	8.75033	8.89693	8.9594	8.91378	9.11263
APPL2	7.04576	7.08645	7.08645	6.61167	6.67364	6.54626	6.77055
FAM219A	6.30803	6.27439	6.31246	6.46739	6.54469	6.61447	6.36878
ZDHHC3	8.29713	8.24623	8.19526	8.20253	8.20528	8.17331	8.51106
ZER1	6.57211	6.74809	6.69686	6.42828	6.6607	6.57334	6.96085
ATF5	8.47536	8.54812	8.48633	8.78213	8.84231	8.79629	9.28246
NTN4	9.30141	9.35893	9.44522	9.90452	9.7979	9.96631	9.77745
CASP3	7.66744	7.72966	7.67444	7.19125	7.26135	7.20916	7.12497
ZSWIM8	7.1172	7.16461	7.05791	7.28048	7.31208	7.23267	7.06353
RNF103	9.09129	8.98842	8.93496	9.47955	9.41684	9.48411	9.91633
EXD2	8.12966	8.11595	8.17794	8.52828	8.51835	8.47008	8.75508
SEPN1	7.0973	7.20281	7.02555	6.86155	6.91442	6.92476	7.29087
CYTH3	5.56318	5.58886	5.45783	5.15799	5.04321	5.17113	4.7539
KIF3C	7.38373	7.45781	7.37324	8.12969	8.07365	8.16415	8.41737
ST3GAL4	7.33326	7.34393	7.35931	7.23052	7.33344	7.13575	6.84495
ZBTB5	8.3115	8.28949	8.11561	8.43092	8.50443	8.46464	8.92954
TNRC6A	9.77846	9.80512	9.96018	10.3775	10.2542	10.4213	9.90659
TOB2	6.87278	6.73463	6.71198	7.24595	7.16281	7.20742	6.8284
SLC4A4	6.85252	6.75109	6.50273	6.71081	6.72	6.69968	7.02348
TNFAIP2	9.84182	9.87559	9.77876	10.0432	10.0211	10.0811	10.3983
STMN2	3.07261	3.08667	2.96857	3.09514	3.00615	3.26904	3.20149
DBI	11.4115	11.4192	11.4513	11.2196	11.1696	11.2155	10.8537
LTBR	10.6452	10.6568	10.5465	10.49	10.5191	10.5424	10.3561
TSC22D3	7.442	7.49576	7.36012	7.17376	7.0776	7.20109	7.50958
EIF4E2	9.61371	9.71638	9.68052	9.71977	9.70041	9.66218	9.56945
MIIP	7.71431	7.68036	7.54777	7.5884	7.62637	7.61574	7.42352
TEX10	9.3695	9.33782	9.3655	9.67784	9.68204	9.60093	9.19303
GLG1	7.67346	7.67933	7.58443	7.91869	7.87433	7.87314	7.60833
AIF1	4.24169	4.06727	4.14611	4.34968	4.26815	4.191	4.68319
SRSF4	9.85006	9.74684	9.66141	9.14498	9.15953	9.23211	9.55497
PDCD6	11.737	11.7352	11.8002	10.3459	10.3268	10.3196	10.1293
ETNK1	8.03907	8.11018	8.01472	8.02651	8.01384	7.93458	8.21223
CDK7	9.70098	9.70844	9.73236	10.2217	10.1599	10.2087	10.2882
PLEKHJ1	8.29689	8.35772	8.27516	8.11375	8.08275	7.99036	7.96827
FARSA	9.28518	9.30283	9.31527	9.29106	9.29999	9.29286	9.20254
QRICH1	9.94874	9.92445	9.91124	9.78455	9.74739	9.73922	9.37701
CCDC167	9.05689	9.02131	8.88517	8.78723	8.80948	8.76537	8.34245
ZNF282	8.10099	8.07755	8.07374	7.87949	7.99545	7.95165	7.78741
NAGLU	8.64928	8.70504	8.6161	8.76131	8.62646	8.6646	8.66229
CCL21	4.21046	4.08313	4.09588	4.22634	4.42133	4.37363	4.60899
ZSCAN18	6.50518	6.47132	6.47046	6.59584	6.5656	6.53928	6.91901
TSSC4	8.47577	8.4028	8.33774	8.46724	8.47441	8.46148	8.80451
PSMG1	10.4522	10.4215	10.4667	10.1182	10.1033	10.1687	9.80526
DHX29	9.3143	9.26187	9.33588	9.11056	9.18103	9.22717	9.61205
CD37	4.27154	4.2643	4.20675	4.26752	4.31034	4.58465	4.01052
EBP	10.8898	10.8679	10.7547	10.2405	10.2616	10.2314	10.5191
EGR1	4.38346	4.3225	4.21652	4.55852	4.94286	4.50329	4.91439
DUSP5	8.64331	8.60655	8.66088	9.16656	9.16392	9.09546	9.61026
PSME4	7.2395	7.28689	7.17651	7.21422	7.08717	7.19717	7.35166
ZNRD1	9.07111	9.0448	8.98674	8.77767	8.69989	8.61517	8.24822
ZNF263	8.03164	8.20204	8.00029	8.13682	8.14537	8.13182	7.92439
KANK2	9.73389	9.72571	9.72288	9.48712	9.48466	9.44014	9.18641
IRF8	5.30574	4.91914	5.05165	5.23206	5.19204	5.32146	5.48724
PPFIA1	7.69255	7.7486	7.60877	7.32144	7.30573	7.26823	7.38028
ATXN7L3	6.058	6.08736	6.01386	6.03262	6.16708	6.20663	6.56613
ZNF512	7.87831	7.91353	7.98659	8.39731	8.41206	8.55608	8.74799
ZHX3	6.02846	6.13798	6.14585	6.35389	6.30657	6.24472	5.96496
CCDC3	5.61854	5.72943	5.71529	5.93722	6.10601	6.03961	6.28045
PTPN12	10.8752	10.9142	10.959	10.7817	10.7422	10.8466	10.8312
CHAMP1	8.97228	8.94974	8.89596	9.00962	9.03305	9.03257	8.70124
GNAI2	8.69694	8.79508	8.7039	8.96927	8.97116	8.88011	9.41744
ECM1	6.03229	6.06904	6.23756	6.61009	6.39085	6.3075	6.10987
PTP4A1	10.9393	10.9056	10.9693	9.2561	9.18533	9.22999	8.90391
MMS19	8.05564	8.00566	7.94476	8.10302	8.11609	8.16833	7.92048
MAGT1	8.47118	8.58782	8.64016	8.84974	8.84443	8.87556	8.61311
ASF1B	8.59543	8.69687	8.54219	7.41187	7.36284	7.21652	6.92774
ZCCHC17	7.66991	7.95106	7.7252	7.00587	6.98492	7.00254	7.437
IER3IP1	9.35891	9.3549	9.31772	9.64138	9.68737	9.76023	9.24876
STAU1	9.13764	9.05613	8.99046	8.66299	8.70979	8.71327	8.20899
FAM136A	9.76164	9.75371	9.69395	9.37678	9.38137	9.40186	9.62548
IGFBP6	10.2614	10.272	10.0934	10.1148	10.1234	10.1453	10.5043
CXCL14	5.60249	5.60051	5.55552	5.5027	5.4441	5.65409	5.27071
CDO1	3.83138	3.88445	3.73158	3.91797	3.92032	3.78557	4.0187
ERCC5 /// BIVM-ERCC5	6.79454	6.75057	6.787	7.15036	7.06714	7.14915	6.67872
CKMT1B /// CKMT1A	6.55045	6.55984	6.24714	6.79517	6.71629	6.70911	7.2468
WFDC2	5.16042	5.15404	5.18636	5.22478	5.34127	5.26396	5.39872
SRRT	8.83644	8.81606	8.71921	8.54556	8.59083	8.70434	8.92771
YAP1	10.312	10.3266	10.4198	10.7701	10.6806	10.7482	11.1708
FOXK2	8.41364	8.55115	8.32436	8.55494	8.44304	8.4028	8.03952
FOLR1	3.68519	3.72597	3.74126	3.86682	3.81116	3.72279	3.47669
TBK1	9.84954	9.85864	9.78525	10.11	10.1782	10.128	10.2624
DNAL4	6.01778	5.97186	5.90252	5.8726	5.85224	5.71813	5.70058
ERMP1	10.0171	10.0471	10.0579	10.2619	10.239	10.2626	10.2091
SMIM3	5.51921	5.79751	5.68185	5.52008	5.37694	5.59012	5.83185
U2AF2	11.6639	11.6781	11.793	11.0284	10.9598	11.1992	11.0452
EIF2B1	8.98177	9.00632	9.22329	8.71526	8.71526	8.87835	8.46861
FNBP4	9.86589	9.88434	9.79778	9.85246	9.92986	9.89575	10.3368
NUMB /// LOC101928143	7.16113	7.1513	7.07148	6.31604	6.45053	6.16842	6.05419
COA5	6.44148	6.42866	6.63496	6.80593	6.83244	6.90316	7.17255
SC5D	6.57078	6.53557	6.59969	6.47696	6.74436	6.63215	6.37887
ZDHHC18	7.60255	7.56028	7.59464	7.67617	7.74227	7.72247	7.37328
DCPS	8.44744	8.49167	8.38675	8.03359	8.00586	8.09347	8.2712
MOGS	7.45989	7.53365	7.39636	7.3719	7.39527	7.32606	7.41663
STK39	6.12571	6.10066	6.2433	5.88243	6.03935	6.16963	6.01602
PATL1	9.32974	9.2798	9.15496	9.19276	9.27322	9.29098	9.65218
TCF3	8.38344	8.47669	8.38126	8.74804	8.72518	8.75239	8.44183
KCTD2	6.9283	6.91638	6.88621	6.33523	6.37432	6.49572	6.16029
MED11	9.50223	9.48926	9.41514	9.10972	9.07853	9.10224	8.86078
KRAS	7.76785	7.83358	7.80348	7.05865	6.99082	6.87601	7.05422
TYW1 /// TYW1B	8.80522	8.78539	8.75041	8.95013	8.89141	8.96246	9.03251
TYW1	8.74227	8.86883	8.88395	8.96877	8.94361	9.06789	8.58327
TMEM216	7.64261	7.6339	7.53484	7.42325	7.50268	7.50469	7.58712
FGFR3	5.67371	5.65453	5.79731	6.06293	6.06394	5.98902	6.29131
FAM20B	7.05092	7.04782	6.75312	6.87396	6.78221	6.8154	7.23951
FAM219B	6.40361	6.64675	6.3693	5.70856	5.70312	5.71367	6.16934
METTL3	8.9322	9.00707	9.01281	9.07938	9.03835	9.09435	9.09105
C7	4.20797	4.08689	3.9629	4.08689	4.15915	3.8591	4.18992
ACP5	6.51505	6.34411	6.44423	6.48027	6.42913	6.44887	5.99851
FBXL3	9.04618	9.23717	9.19896	8.98548	8.95049	8.96993	8.80191
GGPS1	7.04835	7.26986	7.15274	8.07688	8.12307	7.95701	7.86086
PITPNB	8.95265	8.9063	8.9932	8.99396	8.97686	9.02338	8.91039
APOC1	9.89247	9.99623	9.92439	10.5114	10.4703	10.5076	10.1706
MRPL40	9.85482	9.85984	9.77193	9.61481	9.59053	9.57251	9.27611
C17orf49 /// RNASEK-C17orf49	9.85792	9.89888	9.70543	9.67462	9.71246	9.70397	9.85666
SUN1	9.60756	9.66054	9.74731	9.13774	9.14025	9.10404	9.29607
SIDT2	5.90736	6.05415	6.05526	6.22028	6.21504	5.92171	6.10927
DNAJC7	10.0852	10.1182	9.96331	9.71678	9.7366	9.80299	9.52872
CBX7	6.2966	6.33084	6.31495	6.44236	6.41275	6.24725	6.71582
NR4A1	7.97153	7.92602	7.90473	8.01065	8.00475	8.01571	7.75398
NUP205	10.7457	10.7621	10.6825	10.5705	10.6298	10.6652	10.4094
MPLKIP	9.8044	9.88514	9.8648	9.82337	9.84206	9.82261	9.75428
C10orf54	7.8489	7.8473	7.83039	8.2644	8.22237	8.23798	7.88177
ZMYM3	7.81851	7.74435	7.56574	6.83183	6.91684	7.04576	7.31815
NCOA5	8.22887	8.29596	8.25757	8.30902	8.3191	8.23649	8.08644
CDC25B	10.5051	10.5419	10.4477	10.2329	10.2401	10.2888	10.0695
MYLIP	6.99051	6.88561	6.9568	6.72863	6.87138	6.74134	7.18954
CPNE2	8.89621	8.84775	8.72008	8.90504	8.87125	8.84368	8.88593
STX18	8.15583	8.10458	7.9096	7.79847	7.8718	7.86083	8.30352
SLC25A22	9.24586	9.35325	9.21829	9.32165	9.29625	9.26514	9.73321
MRPL4	9.21073	9.21875	9.10725	9.06611	9.09859	8.97936	8.80131
IRS2	8.68226	8.7679	8.88491	8.28058	8.36341	8.34263	8.67886
CELA2B	5.18449	5.13854	5.05578	5.24714	5.15295	5.15872	4.73614
ZMAT5	7.47687	7.42284	7.37726	7.24011	7.24898	7.17986	7.37544
ADARB1	4.95911	5.35156	5.16059	5.21488	5.27512	5.17933	5.19603
LRRC20	8.3126	8.30517	8.26213	8.30326	8.30326	8.27707	7.8726
SSFA2	10.1849	10.189	10.3803	10.1976	10.1638	10.2424	9.81377
IFT52	8.41768	8.62987	8.49204	8.33446	8.34052	8.30054	8.29341
IL1R1	8.84222	8.79358	8.81117	9.04199	9.03608	9.12202	8.94249
NCOA7	9.15556	9.22028	9.28721	9.23213	9.1528	9.21197	9.38878
PUS1	9.71063	9.67622	9.54047	9.75775	9.76482	9.69889	9.67833
RAB11A	11.3405	11.3353	11.3315	11.4835	11.4716	11.5335	11.072
ATP6V0A1	6.83886	6.82324	6.89727	6.94904	6.9083	6.85106	7.27483
FNTB /// CHURC1-FNTB	8.05423	8.13088	8.01173	7.81796	7.77114	7.72764	7.93179
APOA2	2.89827	3.00509	2.99065	2.9347	2.90705	3.04055	2.99113
PPIL1	9.34718	9.31033	9.27788	9.04689	9.03666	8.99519	9.50416
MDK	7.581	7.53865	7.64175	7.58734	7.58303	7.55103	8.01523
DCAF12	8.65656	8.70577	8.65425	8.62144	8.52692	8.60303	9.01063
SNRPE	11.4331	11.4824	11.4264	11.3465	11.3241	11.3662	11.7549
MED17	6.71078	6.41872	6.45691	6.32398	6.50043	6.32665	6.51517
RAB11B	7.30679	7.15209	6.97178	7.1455	7.042	7.25793	7.00903
ITPK1	4.14553	4.00436	4.16757	4.02734	4.25383	3.93957	4.45273
GLRX	8.92839	8.98557	8.90003	8.1676	8.12951	8.17392	7.77236
BASP1	12.064	12.1029	12.0882	12.1231	12.1071	12.143	11.6474
TBC1D23	7.39306	7.49577	7.40983	8.01525	7.98468	8.03124	7.97655
LSM1	9.13383	9.17449	9.13398	8.81412	8.80296	8.76201	8.44034
BTBD3	6.285	6.32547	6.24408	6.10342	6.06808	6.14567	6.00661
UTP11L	8.27035	8.3336	8.35708	8.33352	8.33583	8.33336	8.26839
TYMS	12.0558	12.0771	12.1076	11.7649	11.7359	11.8174	11.5227
TTYH2	6.81085	6.73515	6.89021	7.17322	7.39243	7.18483	7.52655
PVALB	3.77553	4.00213	3.88653	3.96728	3.96678	3.78199	4.16138
NME3	9.32955	9.42854	9.33285	9.28684	9.28628	9.27392	9.58343
LBHD1 /// C11orf98	10.1252	10.2446	10.1155	9.73161	9.67155	9.60214	9.42795
S100A4	13.2475	13.273	13.2503	13.2859	13.266	13.2763	12.8816
PVRL2	9.30455	9.29062	9.24962	9.72713	9.6995	9.75678	9.29467
TCTN1	7.49625	7.47033	7.55717	7.38533	7.40793	7.37291	7.8361
MYO1E	9.71055	9.74364	9.59803	9.34724	9.32441	9.33558	9.29323
NCOR2	6.42116	6.60391	6.44158	6.35131	6.3598	6.38412	6.53833
IL4R	7.6415	7.59848	7.50615	7.2776	7.32369	7.26151	6.89296
MAPKAPK3	7.57839	7.69324	7.62056	7.35948	7.38632	7.20081	7.65908
BCL2L11	7.19803	7.27251	7.31923	7.34386	7.27763	7.24127	7.37344
ATP2B4	7.57236	7.57963	7.6426	7.75602	7.77536	7.85542	7.89668
LYN	7.49095	7.55035	7.4865	7.55481	7.51825	7.5061	7.14145
SHKBP1	8.16111	8.12796	8.02436	8.22707	8.20191	8.13583	7.82446
TNKS	7.96516	8.03785	7.94867	7.9351	7.96554	8.00805	8.37249
TPCN1	9.05245	9.07873	9.02239	8.98847	9.01798	8.97333	8.6828
RAB11FIP1	7.11205	7.14518	7.03045	7.36194	7.43779	7.47478	7.41129
BIVM	6.23092	6.37302	6.21239	5.83649	5.97806	5.93662	5.7563
NPRL2	8.33617	8.34707	8.19417	8.31514	8.31572	8.22831	8.65278
RNF38	7.88002	7.94756	7.97411	8.79872	8.77618	8.84429	9.0516
MEF2A	6.98961	7.0488	7.16015	6.41859	6.35108	6.36093	6.21323
ENDOD1	5.66666	5.80245	5.57073	5.99824	6.05385	6.15903	5.68678
IFT20	9.21569	9.22448	9.2177	8.70116	8.72882	8.71254	8.89561
CD59	11.1523	11.205	11.1746	11.2311	11.2429	11.2357	11.1132
RELA	7.50614	7.58699	7.40242	7.1805	7.18598	7.16948	6.82375
IPO5	8.01377	7.96143	7.94502	7.80513	7.86302	7.84591	7.73349
DLD	11.7821	11.7478	11.8114	11.8546	11.8384	11.9258	12.0203
SF3A3	8.9473	8.95367	8.87465	9.17922	9.16443	9.21069	9.60377
SRP54	9.48909	9.4328	9.54847	9.6719	9.64561	9.68503	9.60915
METTL13	8.26766	8.48672	8.49004	8.57623	8.53849	8.61517	8.66263
NFS1	9.45702	9.47575	9.3738	7.98621	7.92038	7.89779	8.42342
CFL2	10.4117	10.4205	10.4868	10.5355	10.5163	10.5558	10.4754
ATP6V1A	8.53071	8.64527	8.73745	8.83899	8.78286	8.81159	8.92042
AIMP1	7.66428	7.5835	7.67802	7.53651	7.52664	7.583	7.83638
TK1	11.0411	11.1808	11.0275	10.26	10.2344	10.2421	10.7087
ARL2	9.46447	9.41008	9.27723	9.2503	9.28338	9.3442	9.58214
OLFM4	3.45341	3.38179	3.32865	3.30636	3.28563	3.20033	3.14861
RBP4	7.28994	7.23931	7.17603	7.00589	6.98801	6.92358	6.87942
CDK5RAP1	8.98907	9.00646	8.94648	8.91526	8.95019	8.88408	9.42762
PRPS2	9.02323	9.04952	8.96346	8.6951	8.74292	8.68193	8.2331
HID1	6.01403	5.98242	5.87332	5.92372	5.99998	5.96227	6.39004
PDXK /// LOC105372824	11.1623	11.2313	11.0383	10.0946	10.0774	10.1372	10.1829
PDXK	8.41203	8.38784	8.3792	7.60557	7.70253	7.58418	7.19407
EMP3	11.1618	11.1537	11.0293	11.4923	11.4717	11.4706	11.7522
DKK1	12.1835	12.1858	12.1455	12.9378	12.9506	12.966	12.7338
TTC27	9.1344	9.08663	9.00262	8.88118	8.95813	8.94349	9.40637
LOC81691	6.32092	6.20619	6.0545	5.3666	5.3257	5.14574	5.34127
DGCR14	5.52421	5.73587	6.09288	5.70767	5.71531	5.78901	5.77086
HPCAL1	9.1891	9.2148	9.05641	8.74863	8.79503	8.76286	8.88266
ATG5	9.04882	9.05913	8.98761	9.12671	9.12354	9.13778	9.29144
APH1A	8.91743	8.90855	8.87484	8.81845	8.77245	8.86096	8.30014
PRADC1	7.66653	7.65329	7.53165	7.29342	7.32131	7.33451	7.45076
HDAC3	8.30293	8.42417	8.27613	7.74968	7.65807	7.70377	7.78134
PPFIBP2	7.44142	7.56181	7.43866	7.39546	7.27574	7.39656	7.32286
HEPH	5.25959	5.21412	5.27173	5.33173	5.43928	5.44434	4.99661
THTPA	7.03164	6.91209	6.94951	7.06905	6.98872	6.99242	6.72518
PTX3	4.39018	4.82882	4.36023	7.08105	7.15756	7.06089	7.05005
NMI	7.70904	7.9122	7.75859	7.23416	7.18179	7.20762	6.76504
KLF13	8.93981	8.928	8.79586	8.48109	8.55251	8.5589	8.46878
MCRS1	8.60472	8.75127	8.64494	8.43379	8.48286	8.47913	8.59333
UGT1A10 /// UGT1A8 /// UGT1A7 /// UGT1A6 /// UGT1A5 /// UGT1A9 /// UGT1A4 /// UGT1A1 /// UGT1A3	6.51171	6.32394	6.38399	5.76372	5.84016	5.87249	5.52402
PPP1R15B	9.19159	9.20246	9.22408	9.84994	9.73637	9.84507	9.88917
RBL2	8.2802	8.32511	8.43803	8.65752	8.69073	8.81763	9.14146
PRDM4	8.61453	8.62803	8.57538	8.02422	8.01582	8.03833	7.83302
MYOF	11.509	11.5416	11.5285	11.9897	11.9956	12.0249	11.9741
AZGP1	5.59882	5.53983	5.67377	5.75825	5.67544	5.8364	5.98516
KMT2B	7.77012	7.88646	7.7919	7.74006	7.57474	7.59879	7.19469
RFWD2	8.44613	8.51707	8.71964	8.55699	8.40097	8.55759	8.46807
C2CD5	7.58256	7.64933	7.86591	7.63455	7.57544	7.6977	7.93069
DDX50	9.48446	9.53664	9.46289	9.17933	9.17137	9.20285	8.96028
B3GNT9	6.76101	6.50205	6.60426	6.92953	6.86409	6.91758	6.77128
CMTM4	7.40049	7.39668	7.42339	7.30324	7.22971	7.43305	7.6058
FERMT2	8.90205	8.92699	8.88223	9.02323	9.05122	9.05769	9.25031
CDCA5	8.76156	8.88783	8.74953	8.28288	8.2693	8.4246	8.10786
FCHSD2	7.64631	7.79371	7.74588	8.0143	7.87421	7.97225	8.43121
UHRF2	9.69174	9.60295	9.64199	9.62283	9.66573	9.70035	9.28945
BNIP1	8.72089	8.69995	8.5605	8.85636	8.87154	8.8033	9.34017
FOXJ2	7.4356	7.44838	7.45212	7.36802	7.31574	7.35867	6.91655
C14orf159	6.72736	6.86255	6.62708	6.41059	6.47745	6.48592	6.89759
VEZF1	8.33189	8.36541	8.40255	7.85618	7.82734	7.98352	8.24572
ATP6V0D1	10.2369	10.2385	10.197	10.6467	10.665	10.6488	10.7538
LHFP	6.45176	6.36321	6.37091	6.49822	6.44007	6.41197	6.22466
KPNA3	9.58919	9.4834	9.51167	9.45286	9.36727	9.44009	9.29769
HEY1	3.43267	3.41013	3.38418	3.4229	3.65305	3.47835	4.03686
BTD	7.36902	7.34231	7.28171	7.52019	7.54884	7.61413	7.46834
PRICKLE4 /// TOMM6	11.5889	11.6219	11.5705	10.2918	10.2195	10.3162	10.5223
REC8	5.7936	5.70631	5.73313	5.41353	5.26429	5.35224	5.66577
TOE1	8.1276	8.01499	8.06207	8.14813	8.07189	8.10442	7.91488
COQ6	8.04116	7.95466	7.8182	7.92958	7.92951	7.87483	7.98135
[truncated: 18,088 more rows]
