# Supplementary material
Source: publisher site journal article supplement (doi:10.18632/aging.103728)
Supplement: Supplementary file 4 [file aging-v12-103728-supplementary-material-SD4.xlsx]

## Sheet: Sheet1
Supplementary Information 2. Analysis of GSCs and GSCRs differences.
	logFC	AveExpr	t	P.Value	adj.P.Val	B	significant
APITD1 /// APITD1-CORT	-0.601386	8.63792	-8.36855	2.60683e-05	0.0239475	3.04635	None
AKR1B10	-0.525698	13.7264	-8.12061	3.2615e-05	0.0239475	2.84985	None
TMEM9B	-0.57852	8.47832	-8.05507	3.46365e-05	0.0239475	2.79676	None
MAPK6	-0.601532	8.45961	-8.01562	3.59203e-05	0.0239475	2.76456	None
TP53TG1	0.566428	8.16381	8.00385	3.63132e-05	0.0239475	2.75493	None
DPM3	-0.629112	9.08202	-7.87979	4.07596e-05	0.0239475	2.65234	None
CAMLG	0.505356	9.50194	7.84875	4.19641e-05	0.0239475	2.62639	None
KIF18A	-0.612474	8.93159	-7.81582	4.3285e-05	0.0239475	2.59874	None
TRIM27	0.550393	8.89199	7.80791	4.36095e-05	0.0239475	2.59207	None
HMGB1 /// CTCFL	-0.511188	12.3025	-7.80402	4.37698e-05	0.0239475	2.5888	None
PHC1	-0.569946	7.43031	-7.78052	4.47527e-05	0.0239475	2.56895	None
THSD1 /// MRPS31P5	0.565258	7.74115	7.7687	4.52565e-05	0.0239475	2.55894	None
CRTAP	0.642226	7.78113	7.76019	4.56229e-05	0.0239475	2.55173	None
ATP6V1G1	0.503223	10.3818	7.74528	4.62731e-05	0.0239475	2.53906	None
RAB3IP	-0.550801	7.03856	-7.69054	4.87489e-05	0.0239475	2.49235	None
SERP1	0.742062	9.53566	7.6825	4.91247e-05	0.0239475	2.48546	None
IFRD1	-0.495835	9.46366	-7.65633	5.03704e-05	0.0239475	2.46297	None
DOCK10	0.631851	9.01105	7.63336	5.14927e-05	0.0239475	2.44317	None
SUMO3	-0.538331	9.38344	-7.59915	5.32159e-05	0.0239475	2.41355	None
TMEM51	0.516325	9.07865	7.59857	5.32454e-05	0.0239475	2.41305	None
BORCS7	0.638259	9.28634	7.58177	5.41156e-05	0.0239475	2.39844	None
IL15RA	0.621521	6.76099	7.50998	5.80144e-05	0.0239475	2.33567	None
OLFML3	0.748529	9.32271	7.50572	5.82556e-05	0.0239475	2.33192	None
GRAMD3	0.576308	6.01255	7.49086	5.91042e-05	0.0239475	2.31885	None
HJURP	-0.545264	9.85375	-7.45786	6.10397e-05	0.0239475	2.28969	None
ZNF140	0.575461	7.87315	7.45446	6.12428e-05	0.0239475	2.28668	None
BUD31	-0.506813	10.7892	-7.44052	6.20841e-05	0.0239475	2.27432	None
C11orf1	0.542624	9.05228	7.43471	6.2439e-05	0.0239475	2.26916	None
VGLL4	-0.728252	7.51173	-7.43203	6.26033e-05	0.0239475	2.26678	None
PRR15	-0.602397	7.17529	-7.42945	6.27619e-05	0.0239475	2.26448	None
CENPE	-0.531409	8.37289	-7.42798	6.28524e-05	0.0239475	2.26318	None
NAMPT	0.514966	9.39958	7.36429	6.69178e-05	0.0239475	2.2063	None
AGMO	-0.532266	6.73542	-7.33944	6.85821e-05	0.0239475	2.18396	None
TMEM43	-0.540208	8.41431	-7.33377	6.89681e-05	0.0239475	2.17886	None
THAP4	-0.533115	9.58286	-7.32784	6.93747e-05	0.0239475	2.17351	None
CFAP20	-0.497853	9.24422	-7.30196	7.118e-05	0.0239475	2.15012	None
ACOT13	0.589982	9.90427	7.29874	7.14079e-05	0.0239475	2.14721	None
ANXA13	-0.556332	7.30052	-7.29662	7.15584e-05	0.0239475	2.14529	None
PDE8A	-0.553232	10.3992	-7.28147	7.26456e-05	0.0239475	2.13155	None
SPIN1	-0.679425	7.15611	-7.26386	7.39321e-05	0.0239475	2.11554	None
UBR5	-0.598484	8.78322	-7.24263	7.55165e-05	0.0239475	2.0962	None
SLC2A13	0.538528	7.4122	7.19461	7.92408e-05	0.0239475	2.05221	None
DCP1A	-0.466497	7.7008	-7.15792	8.22238e-05	0.0239475	2.01839	None
MLXIP	-0.683654	7.68933	-7.15593	8.23883e-05	0.0239475	2.01656	None
FAM127B	-0.477742	10.2784	-7.1472	8.31178e-05	0.0239475	2.00849	None
BIRC5	-0.576339	10.2288	-7.14672	8.31583e-05	0.0239475	2.00804	None
ARNTL	-0.520207	7.58339	-7.13731	8.39525e-05	0.0239475	1.99933	None
ZNF436-AS1	0.593493	7.12568	7.11632	8.57558e-05	0.0239475	1.97985	None
MED8	-0.745636	7.65523	-7.09602	8.75401e-05	0.0239475	1.96096	None
TMEM14C	0.540749	11.8338	7.08825	8.82333e-05	0.0239475	1.95372	None
OPN3	0.448543	10.719	7.08748	8.83026e-05	0.0239475	1.953	None
HERC4	0.647326	7.43012	7.08173	8.88208e-05	0.0239475	1.94762	None
DHX15	-0.718227	11.2261	-7.07822	8.91378e-05	0.0239475	1.94435	None
EPS8	0.64719	10.1511	7.07457	8.94696e-05	0.0239475	1.94094	None
PKP3	-0.496618	8.19897	-7.07141	8.97579e-05	0.0239475	1.93798	None
TULP3	-0.634267	7.51334	-7.05919	9.08826e-05	0.0239475	1.92654	None
AHR	0.482703	6.97774	7.03594	9.30652e-05	0.0239475	1.90472	None
AHNAK	-0.681318	8.93067	-7.03274	9.337e-05	0.0239475	1.90171	None
TRIM14	-0.667395	7.7134	-7.01434	9.51442e-05	0.0239475	1.88439	None
NR3C1	0.642726	9.74334	7.00282	9.62744e-05	0.0239475	1.87352	None
NCBP1	-0.547436	7.62817	-6.98561	9.79901e-05	0.0239475	1.85725	None
PRSS3	-0.523773	7.45595	-6.97966	9.85919e-05	0.0239475	1.8516	None
TNFAIP8	0.707037	8.59691	6.97939	9.86188e-05	0.0239475	1.85135	None
MYO19	-0.502286	7.78563	-6.95177	0.000101464	0.0239475	1.82512	None
UTP6	-0.608555	10.3161	-6.94836	0.000101821	0.0239475	1.82189	None
MORC4	-0.576572	9.51506	-6.94757	0.000101904	0.0239475	1.82113	None
CRY1	0.476085	9.2009	6.91454	0.000105443	0.0239475	1.78961	None
CYB5D1	-0.505435	6.03654	-6.90941	0.000106004	0.0239475	1.78471	None
DIAPH3	-0.517012	8.25655	-6.90533	0.000106453	0.0239475	1.7808	None
PVRL2	0.442938	9.4747	6.88665	0.000108536	0.0239475	1.76289	None
RBMX2	-0.628843	8.76827	-6.88039	0.000109244	0.0239475	1.75688	None
PNRC1	0.896511	10.0907	6.87787	0.00010953	0.0239475	1.75446	None
NTHL1	-0.593626	8.98067	-6.87161	0.000110245	0.0239475	1.74843	None
PCED1B	-0.574226	9.24208	-6.86758	0.000110708	0.0239475	1.74456	None
PLPP6	-0.568931	7.48457	-6.86731	0.00011074	0.0239475	1.74429	None
SPAG4	0.486493	6.09528	6.86121	0.000111445	0.0239475	1.73841	None
KLHL28	0.5293	6.30767	6.85745	0.000111882	0.0239475	1.73479	None
AIFM1	-0.45063	10.0632	-6.85616	0.000112033	0.0239475	1.73355	None
ZNF581	0.49826	9.05889	6.83988	0.00011395	0.0239475	1.71783	None
UBE2I	-0.589949	10.8747	-6.82714	0.000115476	0.0239475	1.70551	None
DCUN1D4	0.47617	8.41885	6.80852	0.000117748	0.0239475	1.68745	None
TTC7B	-0.495233	7.35852	-6.80801	0.00011781	0.0239475	1.68696	None
DLST	-0.568427	8.413	-6.79755	0.000119108	0.0239475	1.6768	None
SREK1IP1	0.466731	7.81616	6.79518	0.000119404	0.0239475	1.67449	None
SIKE1	0.512915	7.36602	6.7923	0.000119766	0.0239475	1.67168	None
HABP4	0.478548	8.69176	6.7799	0.000121335	0.0239475	1.65961	None
PHLDB2	-0.703612	5.72935	-6.75893	0.00012404	0.0239475	1.63913	None
WEE1	0.507814	9.62999	6.75446	0.000124625	0.0239475	1.63477	None
RFT1	-0.549538	7.85072	-6.75052	0.000125143	0.0239475	1.63091	None
DDB2	0.60053	9.35606	6.74699	0.000125609	0.0239475	1.62746	None
MESP1	-0.806651	7.37769	-6.74554	0.000125802	0.0239475	1.62603	None
CCDC117	0.485289	7.84097	6.73935	0.000126625	0.0239475	1.61997	None
QKI	0.598017	9.82246	6.73795	0.000126813	0.0239475	1.61859	None
SLCO4A1	-0.43481	8.00628	-6.72232	0.000128923	0.0239475	1.60325	None
TIA1	-0.468815	7.81396	-6.72183	0.00012899	0.0239475	1.60276	None
ARNTL2	0.446687	8.20093	6.72067	0.000129147	0.0239475	1.60163	None
MCU	-0.461234	9.5369	-6.71934	0.00012933	0.0239475	1.60032	None
NAP1L5	-0.629169	5.59277	-6.70948	0.000130685	0.0239475	1.59062	None
TK1	-0.744019	10.6707	-6.69106	0.000133261	0.0239475	1.57245	None
HTATIP2	0.478845	11.2735	6.67636	0.000135356	0.0239475	1.55792	None
IQCB1	-0.570056	7.24121	-6.65471	0.000138508	0.0239475	1.53647	None
KMT2C	-0.607787	6.89747	-6.6495	0.000139277	0.0239475	1.53131	None
PROCR	-0.433201	9.58488	-6.63017	0.000142178	0.0239475	1.51209	None
RTTN	-0.582232	8.37659	-6.62972	0.000142246	0.0239475	1.51164	None
PTPN4	0.439791	8.59949	6.62049	0.000143656	0.0239475	1.50243	None
CKAP5	-0.435435	9.2738	-6.60958	0.000145341	0.0239475	1.49155	None
AEN	0.581151	9.20978	6.60584	0.000145924	0.0239475	1.48781	None
CRKL	-0.658247	8.02461	-6.60226	0.000146483	0.0239475	1.48424	None
KRT80	0.429508	8.30519	6.59702	0.000147309	0.0239475	1.47899	None
NPIPB6	0.65719	6.4448	6.59412	0.000147766	0.0239475	1.4761	None
ISYNA1	0.484635	9.07465	6.58806	0.00014873	0.0239475	1.47002	None
STX10	-0.478361	9.26719	-6.57835	0.000150286	0.0239475	1.46029	None
PKD1P6 /// LOC101060429	-0.484278	6.62987	-6.57193	0.000151326	0.0239475	1.45385	None
FOXN2	0.45616	8.68062	6.55744	0.000153702	0.0239475	1.43928	None
SEPW1	-0.667621	8.98276	-6.55087	0.000154792	0.0239475	1.43267	None
EML3	-0.449231	8.68336	-6.54715	0.000155414	0.0239475	1.42892	None
CSRP1	-0.426387	10.6931	-6.54138	0.000156383	0.0239475	1.42311	None
ZNHIT3	-0.850857	9.77702	-6.54068	0.000156501	0.0239475	1.4224	None
TM4SF18	-0.435955	9.98258	-6.53782	0.000156984	0.0239475	1.41951	None
RAC1	-0.716864	5.91998	-6.51621	0.000160688	0.0239475	1.39768	None
WASL	-0.908155	8.0706	-6.51071	0.000161647	0.0239475	1.39211	None
PGM3	-0.759501	7.76221	-6.50822	0.000162082	0.0239475	1.38959	None
TMEM203	-0.414778	9.68698	-6.50513	0.000162625	0.0239475	1.38646	None
UBN1	-0.578695	7.52979	-6.50334	0.000162941	0.0239475	1.38464	None
ATP2B1	0.443581	7.88313	6.50231	0.000163122	0.0239475	1.3836	None
ARHGEF10	-0.910251	8.53863	-6.50058	0.000163427	0.0239475	1.38185	None
SERPINH1	-0.564124	9.75266	-6.49493	0.00016443	0.0239475	1.37612	None
ADCK3	0.770448	7.59979	6.47664	0.000167724	0.0239475	1.35752	None
CRADD	-0.614862	7.5592	-6.46914	0.000169095	0.0239475	1.34989	None
FANCI	-0.623135	9.21484	-6.46601	0.000169672	0.0239475	1.34669	None
LYRM1	0.45677	10.7199	6.46547	0.000169772	0.0239475	1.34614	None
CXCL5 /// GLYR1	-0.435238	10.9424	-6.46494	0.000169868	0.0239475	1.34561	None
ZNF211	0.519313	6.89083	6.4624	0.000170339	0.0239475	1.34301	None
TICRR	-0.575321	6.26476	-6.44574	0.000173455	0.0239475	1.326	None
APBA2	-0.426403	6.46231	-6.43562	0.000175378	0.0239475	1.31565	None
ESRRA	-0.537677	7.61416	-6.43402	0.000175684	0.0239475	1.31401	None
CLYBL	0.496926	6.25772	6.42635	0.000177159	0.0239475	1.30616	None
NR2F1-AS1	-0.49205	7.40983	-6.42081	0.000178234	0.0239475	1.30048	None
TM7SF2	0.433421	8.40545	6.42012	0.000178369	0.0239475	1.29977	None
CIZ1	-0.607789	9.11803	-6.41815	0.000178753	0.0239475	1.29775	None
FAM110B	0.624801	7.09746	6.39584	0.000183167	0.0239475	1.27482	None
TMEM14B	0.472658	12.4257	6.39462	0.000183413	0.0239475	1.27356	None
GCC1	-0.462948	8.1669	-6.38959	0.000184425	0.0239475	1.26838	None
FAM111A	-0.431443	6.65698	-6.37897	0.000186586	0.0239475	1.25743	None
SPATA7	0.60705	6.30165	6.36931	0.000188574	0.0239475	1.24745	None
ORC5	-0.439639	9.06921	-6.3579	0.000190952	0.0239475	1.23566	None
TOP2A	-0.468229	12.0326	-6.35217	0.00019216	0.0239475	1.22972	None
CHPT1	-0.614491	9.18525	-6.3475	0.00019315	0.0239475	1.22488	None
EXOSC8	-0.448845	9.87699	-6.34254	0.000194207	0.0239475	1.21974	None
TSR2	-0.568986	9.03547	-6.33959	0.000194839	0.0239475	1.21668	None
PCK2	-0.654406	7.90897	-6.33808	0.000195164	0.0239475	1.21512	None
INSIG1	0.757936	9.71979	6.33	0.000196911	0.0239475	1.20672	None
PDGFRL	-0.434687	7.95625	-6.3244	0.000198132	0.0239475	1.2009	None
SLC22A18	0.588749	8.18375	6.3183	0.000199469	0.0239475	1.19456	None
TUBE1	-0.538971	7.22268	-6.31493	0.000200213	0.0239475	1.19105	None
FAM46A	0.424646	7.09674	6.31414	0.000200388	0.0239475	1.19022	None
TENM3	0.664981	9.85876	6.31397	0.000200425	0.0239475	1.19005	None
SS18L2	-0.431232	9.31458	-6.31368	0.00020049	0.0239475	1.18975	None
FAM3C	0.886149	9.26383	6.31231	0.000200794	0.0239475	1.18832	None
TP53BP1	0.476364	7.28252	6.307	0.000201977	0.0239475	1.18278	None
CLCN3	0.501793	8.17917	6.30523	0.000202372	0.0239475	1.18094	None
NFYA	-0.695682	7.47494	-6.30146	0.000203217	0.0239475	1.17701	None
RPS19BP1	-0.535809	10.2042	-6.29857	0.000203868	0.0239475	1.17399	None
CENPU	-0.751158	6.86258	-6.2902	0.000205767	0.0239475	1.16525	None
MYC	0.494204	10.8555	6.28864	0.000206123	0.0239475	1.16362	None
FAM219B	-0.688799	6.10205	-6.28144	0.000207774	0.0239475	1.15609	None
PKNOX1	-0.604105	5.84685	-6.27715	0.000208764	0.0239475	1.1516	None
SP110	-0.496119	5.66983	-6.27059	0.000210289	0.0239475	1.14474	None
CXCL8	0.78602	7.92094	6.27007	0.000210412	0.0239475	1.14418	None
HSPB1	-0.471354	12.0346	-6.26989	0.000210453	0.0239475	1.144	None
CAND2	0.685301	6.44814	6.26728	0.000211064	0.0239475	1.14126	None
SLC35D2	0.44682	7.71418	6.26345	0.000211965	0.0239475	1.13724	None
DNM1	-0.57373	9.1346	-6.2584	0.000213157	0.0239475	1.13195	None
ISG20	-0.68655	6.83808	-6.25785	0.000213286	0.0239475	1.13137	None
CCNB1IP1	0.419833	9.60312	6.25021	0.000215106	0.0239475	1.12335	None
MTFR2	-0.521202	8.11877	-6.24684	0.000215916	0.0239475	1.1198	None
TRAF1	0.572891	5.48286	6.23939	0.000217713	0.0239475	1.11197	None
SMUG1	0.470857	6.85456	6.22403	0.000221473	0.0239475	1.09579	None
SRPX	0.663891	8.07612	6.21836	0.00022288	0.0239475	1.0898	None
PTPRM	0.431624	9.01847	6.21549	0.000223596	0.0239475	1.08676	None
PSMF1	-0.823328	9.59873	-6.21494	0.000223732	0.0239475	1.08619	None
SECISBP2	0.667815	8.06502	6.20436	0.000226394	0.0239475	1.075	None
HIST1H4K /// HIST1H4J	-0.445676	7.13126	-6.20248	0.000226869	0.0239475	1.07302	None
NOM1	-0.428701	6.47562	-6.19286	0.000229327	0.0239475	1.06283	None
NPLOC4	-0.412373	8.05566	-6.18652	0.00023096	0.0239475	1.05611	None
DUSP8 /// LOC101927562	0.753558	5.68832	6.18198	0.000232138	0.0239475	1.0513	None
FABP5 /// FABP5P2	-0.417706	10.7508	-6.17813	0.000233143	0.0239475	1.04721	None
THOC5	-0.629466	8.63719	-6.17563	0.000233797	0.0239475	1.04456	None
KCNMB4	0.637436	7.15115	6.17386	0.000234262	0.0239475	1.04268	None
RHBDF2	0.512842	7.64315	6.17309	0.000234464	0.0239475	1.04186	None
WDR4	-0.481619	7.05959	-6.17041	0.00023517	0.0239475	1.03901	None
GRN	0.505496	10.1322	6.16745	0.000235953	0.0239475	1.03587	None
LOC100133299	0.921395	8.19894	6.16205	0.000237389	0.0239475	1.03012	None
ABCG2	0.57782	6.88869	6.1609	0.000237696	0.0239475	1.02889	None
NAPB	-0.472115	5.46638	-6.15801	0.000238468	0.0239475	1.02583	None
SNAP29	-0.730911	6.14122	-6.15546	0.000239154	0.0239475	1.0231	None
2015-09-01	-0.489323	11.3055	-6.15408	0.000239526	0.0239475	1.02163	None
ID1	-0.612054	10.8249	-6.14819	0.000241118	0.0239475	1.01536	None
RSPRY1	-0.493557	8.08879	-6.13919	0.000243573	0.0239475	1.00575	None
SEC23IP	0.506484	9.61998	6.13767	0.000243989	0.0239475	1.00414	None
IL27RA	0.486056	6.44138	6.13734	0.000244081	0.0239475	1.00378	None
SPIN3	-0.503905	5.88725	-6.1281	0.000246635	0.0239475	0.993914	None
ME2	-0.661573	9.01357	-6.12585	0.000247263	0.0239475	0.991504	None
CERS4	0.488625	4.95071	6.12209	0.000248312	0.0239475	0.987488	None
PLAUR	-0.425902	8.69752	-6.11437	0.000250487	0.0239475	0.979216	None
C10orf54	0.389494	8.01902	6.11408	0.00025057	0.0239475	0.978903	None
SERAC1	-0.569872	5.10748	-6.10989	0.000251759	0.0239475	0.974415	None
C10orf54 /// ZNF664	-0.871905	10.241	-6.10903	0.000252003	0.0239475	0.973496	None
ORMDL2	0.494013	10.9991	6.10396	0.000253452	0.0239475	0.968054	None
SNX1	0.439094	6.56424	6.09493	0.000256053	0.0239475	0.958369	None
EXOG	-0.627564	7.19045	-6.09086	0.000257237	0.0239475	0.953988	None
METTL23	-0.576682	10.0988	-6.0906	0.000257311	0.0239475	0.953714	None
PTS	-0.40628	9.62251	-6.09047	0.000257351	0.0239475	0.953568	None
RITA1	-0.396704	9.08379	-6.09033	0.000257391	0.0239475	0.95342	None
CXorf40A /// CXorf40B	-0.75976	8.82541	-6.08923	0.000257712	0.0239475	0.952238	None
PDRG1	-0.427802	9.27227	-6.08393	0.000259264	0.0239475	0.94654	None
EOMES	0.684493	5.61993	6.08357	0.000259369	0.0239475	0.946153	None
MATN3	-0.596479	6.25626	-6.08173	0.00025991	0.0239475	0.944176	None
ARHGEF7	-0.46249	5.27173	-6.05919	0.000266645	0.0242231	0.919881	None
TNRC6A	0.488412	10.0719	6.05795	0.000267022	0.0242231	0.918536	None
IMPA2	-0.435125	9.87797	-6.05468	0.000268016	0.0242231	0.915006	None
FAM200B	-0.393952	9.29706	-6.04154	0.000272053	0.0242231	0.9008	None
RPS6KA5	0.525364	6.55451	6.04118	0.000272163	0.0242231	0.900415	None
SRSF4	-0.524446	9.47856	-6.04061	0.000272341	0.0242231	0.899795	None
ZCCHC17	-0.698015	7.39664	-6.03985	0.000272577	0.0242231	0.898971	None
AKIP1 /// NUAK2	0.620131	10.081	6.03906	0.000272822	0.0242231	0.898118	None
TLK1	-0.850639	8.00945	-6.03601	0.000273771	0.0242231	0.894817	None
SERTAD1	0.598589	9.06398	6.02259	0.000277992	0.0242231	0.880268	None
OLFML2A	0.476016	8.36381	6.01979	0.000278882	0.0242231	0.877227	None
TP53I3	0.668327	10.3298	6.01698	0.000279777	0.0242231	0.874178	None
UPRT	-0.534198	7.04468	-6.01232	0.000281271	0.0242231	0.869113	None
GPX2	-0.440597	11.2983	-6.00784	0.000282713	0.0242231	0.864248	None
TTC9	-0.525186	6.32903	-6.00641	0.000283178	0.0242231	0.862686	None
PARP11	-0.462762	4.70631	-5.99989	0.000285297	0.0242231	0.85559	None
C1orf216	-0.829686	7.75784	-5.99351	0.000287385	0.0242231	0.848649	None
LRRC58	-0.665621	9.29039	-5.98807	0.000289183	0.0242231	0.842714	None
THOC3	0.499166	6.22509	5.98785	0.000289256	0.0242231	0.842472	None
TIMM10B	-0.400395	7.73642	-5.98714	0.000289491	0.0242231	0.841698	None
ATP11A	-0.396506	7.78083	-5.98502	0.000290195	0.0242231	0.839386	None
TNFRSF10C /// LOC254896	0.554538	5.84723	5.98416	0.00029048	0.0242231	0.838453	None
UBE2L6	0.791574	8.83168	5.98142	0.000291394	0.0242231	0.835462	None
COMMD5	-0.439814	8.23046	-5.98007	0.000291844	0.0242231	0.833991	None
MCM10	-0.725783	7.8771	-5.96392	0.000297304	0.0245258	0.816338	None
OAS1	-0.867502	7.39904	-5.96208	0.000297933	0.0245258	0.814323	None
NLK	0.403891	7.34217	5.95708	0.000299651	0.0245665	0.808845	None
TBCE	0.403234	9.94147	5.94651	0.000303313	0.0246985	0.79727	None
FAM102B	-0.798884	7.54972	-5.94535	0.000303721	0.0246985	0.795989	None
CCDC88A	-0.405068	7.59986	-5.93371	0.000307818	0.0249308	0.783214	None
HSPA4L	0.671	7.60965	5.92638	0.00031043	0.0250413	0.775159	None
SHANK3	0.481035	5.77967	5.9224	0.000311858	0.0250559	0.770781	None
NR1D2	0.687156	7.90984	5.91042	0.000316203	0.0252278	0.75758	None
AGPAT5	-0.725042	10.4442	-5.90495	0.000318207	0.0252278	0.751551	None
CRYM	0.515262	7.39825	5.89696	0.000321162	0.0252278	0.742729	None
CD46	0.458785	12.0968	5.89308	0.000322608	0.0252278	0.738443	None
NOL8	0.402572	8.05897	5.88816	0.00032445	0.0252278	0.733005	None
ANTXR1	-0.662542	9.64226	-5.88657	0.000325048	0.0252278	0.731249	None
KCNQ1OT1	0.654901	5.24026	5.88154	0.000326947	0.0252278	0.725686	None
APOC1	0.5005	10.2104	5.88119	0.00032708	0.0252278	0.725297	None
CCNB2	-0.484945	10.0813	-5.87575	0.000329153	0.0252278	0.719266	None
SCYL3	0.411923	5.75977	5.87548	0.000329253	0.0252278	0.718974	None
STX3	0.412351	7.95138	5.87423	0.000329733	0.0252278	0.717583	None
MECP2	0.452828	7.85514	5.87264	0.000330341	0.0252278	0.715824	None
HOMER2	-0.451434	4.38465	-5.86682	0.000332579	0.0252278	0.709375	None
MTMR10	-0.392542	7.85976	-5.86528	0.000333174	0.0252278	0.707666	None
VEZF1	-0.447379	8.14466	-5.86271	0.00033417	0.0252278	0.704815	None
GNA11	-0.398362	8.84267	-5.86085	0.000334895	0.0252278	0.702745	None
MUS81	-0.430665	8.25146	-5.85807	0.000335977	0.0252278	0.699663	None
PRDM13	0.423931	5.05567	5.85646	0.000336605	0.0252278	0.697877	None
SHCBP1	-0.795933	9.18716	-5.85095	0.00033877	0.0252647	0.691749	None
TACO1	-0.430063	9.44849	-5.84662	0.000340481	0.0252647	0.686936	None
AKR7A2	-0.388327	9.24302	-5.84439	0.000341366	0.0252647	0.684454	None
PROSC	-0.61989	8.55796	-5.84247	0.000342129	0.0252647	0.682319	None
IKBIP	0.870514	8.90236	5.83599	0.000344722	0.0253629	0.675102	None
CENPM	-0.428991	9.30587	-5.83271	0.00034604	0.025367	0.671453	None
RBL1	-0.477904	6.36296	-5.8255	0.00034896	0.0253756	0.663417	None
TBCCD1	-0.800416	6.59326	-5.82523	0.00034907	0.0253756	0.663116	None
TTK	-0.396428	8.69944	-5.82308	0.000349947	0.0253756	0.660715	None
AGO2	-0.637788	8.07948	-5.81309	0.000354054	0.025581	0.649554	None
ADGRG1	-0.377461	11.2612	-5.80546	0.000357222	0.0256493	0.641031	None
GBP2	0.67406	4.51191	5.79711	0.000360727	0.0256493	0.631685	None
MCM4	-0.38572	10.3702	-5.79616	0.000361128	0.0256493	0.630622	None
TMEM151A	0.632604	7.11604	5.79537	0.000361465	0.0256493	0.62973	None
NDUFV3	0.992626	6.94185	5.79057	0.000363501	0.0256493	0.624354	None
TRIB1	1.02828	10.5878	5.78914	0.00036411	0.0256493	0.622749	Up
TFPI	0.685614	9.29326	5.78815	0.000364531	0.0256493	0.621645	None
ZNF319	0.462782	7.92668	5.78655	0.000365214	0.0256493	0.619851	None
IL34	0.450302	6.55485	5.77613	0.000369706	0.0258742	0.608147	None
PVRL3	0.967805	10.0858	5.76777	0.00037335	0.0260386	0.598751	None
VCPIP1	0.628325	7.27013	5.75614	0.000378486	0.0261679	0.585662	None
FBXO5	-0.637081	9.06757	-5.75434	0.000379286	0.0261679	0.583638	None
PPP1R36	0.644014	5.17214	5.75259	0.000380066	0.0261679	0.58167	None
SSX2IP	-0.433047	7.94757	-5.75181	0.000380416	0.0261679	0.580788	None
CASP8	0.466161	8.3741	5.73904	0.000386175	0.0264734	0.566386	None
DENND3	0.483537	7.42577	5.73207	0.00038936	0.0264746	0.558511	None
RPS4Y1	0.37253	12.5408	5.72336	0.000393381	0.0264746	0.548657	None
HMGXB4	-0.388546	8.44663	-5.72288	0.000393604	0.0264746	0.548115	None
NCAPH2	-0.485584	8.73523	-5.72146	0.000394263	0.0264746	0.54651	None
PGD	-0.549945	11.9576	-5.72029	0.000394809	0.0264746	0.545184	None
ROCK1 /// ROCK1P1	-0.424696	7.48654	-5.71863	0.000395583	0.0264746	0.543303	None
CHEK1	-0.586926	7.99604	-5.71151	0.000398923	0.0264746	0.535239	None
TOB2	0.418446	6.96628	5.70848	0.000400351	0.0264746	0.53181	None
GTF3A	-0.860596	10.1811	-5.70837	0.000400407	0.0264746	0.531677	None
DYNC1LI1	-0.541151	7.81186	-5.70802	0.000400572	0.0264746	0.531281	None
KLHL21	0.374824	7.80527	5.70546	0.000401783	0.0264746	0.528385	None
SRPRB	-0.900555	9.60009	-5.70499	0.000402009	0.0264746	0.527846	None
SLC7A1	-0.409313	6.52095	-5.69521	0.000406687	0.0266293	0.516741	None
UBE4B	-0.390501	7.89349	-5.69454	0.00040701	0.0266293	0.515981	None
TM4SF20	0.489097	6.70287	5.68051	0.00041383	0.0269274	0.500028	None
UBE2M	-0.415959	10.4679	-5.67966	0.000414248	0.0269274	0.499059	None
FAM35A /// FAM35BP /// FAM35DP	-0.373792	10.5187	-5.6737	0.000417186	0.0269856	0.492272	None
BDH2 /// SLC9B2	0.413141	8.16788	5.66542	0.000421303	0.0269856	0.48284	None
DDIT3	0.545718	6.68196	5.6626	0.00042272	0.0269856	0.479615	None
ECHDC1	-0.965021	8.87655	-5.66053	0.000423757	0.0269856	0.477261	None
ANXA9	0.588723	5.4714	5.65992	0.000424064	0.0269856	0.476565	None
CARS	-0.450108	9.19084	-5.65545	0.000426327	0.0269856	0.471453	None
PRR11	-0.401228	7.66892	-5.65324	0.000427448	0.0269856	0.468928	None
FUT10	0.600505	6.34229	5.65226	0.000427944	0.0269856	0.467814	None
EIF1B	-0.541481	9.44422	-5.65128	0.000428442	0.0269856	0.466697	None
DAP	-0.527392	9.37673	-5.65102	0.000428577	0.0269856	0.466393	None
CINP	-0.375174	9.22587	-5.64617	0.000431057	0.0270569	0.460849	None
AKAP2 /// PALM2-AKAP2	0.391885	8.10873	5.64028	0.000434089	0.0271623	0.454114	None
AMOTL1	-0.418337	6.37437	-5.62918	0.000439871	0.0274387	0.441393	None
CSPG5	0.658298	6.5485	5.62096	0.000444202	0.027623	0.431972	None
GATA2	0.412497	7.7498	5.60899	0.000450597	0.0279015	0.418223	None
MMP24	-0.426831	8.51265	-5.59983	0.000455562	0.0279015	0.407681	None
CCNA2	-0.417829	9.51811	-5.598	0.00045656	0.0279015	0.405575	None
SLC30A7	-0.410126	5.83762	-5.59607	0.000457616	0.0279015	0.403353	None
TUBA4A	-0.738563	10.6176	-5.58984	0.000461043	0.0279015	0.396172	None
TM2D2	-0.411278	6.7113	-5.5869	0.000462669	0.0279015	0.392783	None
RGPD4	0.403695	8.03518	5.584	0.000464278	0.0279015	0.389441	None
SEPSECS	-0.397367	5.97481	-5.58192	0.000465438	0.0279015	0.38704	None
FNDC3B	0.47315	8.55595	5.57886	0.000467148	0.0279015	0.383509	None
FKBP15 /// CDC26	-0.522544	8.84924	-5.57621	0.000468634	0.0279015	0.380452	None
PPP1CB	0.404761	8.6322	5.57423	0.000469748	0.0279015	0.378165	None
ABCC5	0.375517	8.04733	5.57368	0.000470059	0.0279015	0.377529	None
PPP1R3B	0.463573	6.4578	5.57223	0.000470877	0.0279015	0.375853	None
BFSP1	0.801141	7.14164	5.56973	0.000472291	0.0279015	0.372966	None
SYT13	-0.566239	6.33629	-5.56444	0.000475304	0.0279015	0.366843	None
THAP11	-0.422374	9.22774	-5.5642	0.000475441	0.0279015	0.366566	None
REEP4	-0.375208	9.1346	-5.56409	0.0004755	0.0279015	0.366446	None
RECQL	-0.465788	8.48207	-5.56352	0.000475827	0.0279015	0.365784	None
SLC16A4	0.433578	9.26636	5.56062	0.00047749	0.0279015	0.362424	None
TESK1	-0.543013	7.76711	-5.56061	0.000477493	0.0279015	0.362418	None
CYP27C1	-0.845893	4.87499	-5.55895	0.000478447	0.0279015	0.360495	None
ACOX2	-0.897134	7.82838	-5.55509	0.000480671	0.0279015	0.356029	None
PRELID1	-0.355728	11.8872	-5.55433	0.000481115	0.0279015	0.355139	None
SEZ6L2	0.385698	7.68399	5.54925	0.000484059	0.0279015	0.349261	None
UBE2S	-0.587916	11.6193	-5.54715	0.000485285	0.0279015	0.346824	None
C19orf66	0.405524	8.19228	5.54228	0.000488137	0.0279015	0.341177	None
AK5	0.418057	5.56206	5.54085	0.000488981	0.0279015	0.339513	None
PPME1	0.776209	9.12937	5.53993	0.000489521	0.0279015	0.338451	None
TOX2	-0.567153	6.49677	-5.5393	0.000489896	0.0279015	0.337712	None
FAM171A1	0.488043	7.69092	5.5378	0.000490778	0.0279015	0.335979	None
RASSF7	-0.470474	7.86695	-5.53617	0.000491743	0.0279015	0.334086	None
CNN3	0.493709	10.1369	5.5286	0.000496249	0.0280415	0.325293	None
NEK10	0.430792	3.76486	5.52735	0.000497002	0.0280415	0.323832	None
TMEM17	-0.363881	7.65225	-5.51859	0.000502279	0.0282113	0.31365	None
UROS	0.357834	10.0191	5.51454	0.000504743	0.0282113	0.308931	None
CCDC138	-0.394821	7.0153	-5.51381	0.000505191	0.0282113	0.308077	None
RAD54B	-0.397925	8.40733	-5.51189	0.000506365	0.0282113	0.305838	None
PON3	-0.536677	9.22893	-5.51079	0.000507034	0.0282113	0.304564	None
TUBA1A /// TUBA1B	-0.386506	13.2172	-5.50777	0.000508891	0.0282247	0.301039	None
CEP70	0.436893	7.7105	5.50441	0.000510963	0.0282247	0.297119	None
MOXD1	0.587343	6.74975	5.50356	0.00051149	0.0282247	0.296126	None
MAVS	-0.422831	8.8671	-5.49792	0.000514989	0.0282804	0.289549	None
FANCG	-0.403086	8.64513	-5.4936	0.000517688	0.0282804	0.284507	None
HIST1H3H	-0.45716	5.56808	-5.4931	0.000518001	0.0282804	0.283924	None
ARHGEF18	-0.384854	8.14066	-5.49138	0.000519084	0.0282804	0.281908	None
SZRD1	-0.833927	8.48941	-5.48854	0.000520874	0.0282804	0.278588	None
BZW1	-0.358515	10.828	-5.48709	0.000521788	0.0282804	0.276896	None
SMC4	-0.621801	10.1113	-5.48619	0.000522355	0.0282804	0.275847	None
UIMC1	-1.02765	9.30712	-5.48378	0.000523885	0.028287	0.273025	Down
NUS1P3 /// NUS1	-0.658081	7.60788	-5.48128	0.000525476	0.0282968	0.270098	None
SKA2	-0.449037	9.21462	-5.4763	0.000528659	0.0283921	0.26427	None
SUSD1	0.769424	8.3694	5.47039	0.000532461	0.0284643	0.257353	None
AFTPH	-0.577429	7.56909	-5.46981	0.000532838	0.0284643	0.25667	None
NR2C2	-0.387427	9.25357	-5.46589	0.000535377	0.0284778	0.25208	None
ZNF462	0.357275	8.15869	5.46505	0.000535926	0.0284778	0.251091	None
CKB	0.482414	8.83865	5.45751	0.000540857	0.028664	0.242247	None
CNTLN	-0.584343	5.04946	-5.4516	0.00054476	0.0287949	0.235303	None
XPNPEP1	-0.371609	8.29885	-5.448	0.000547148	0.0288452	0.231079	None
XRCC1	-0.721217	7.83608	-5.44268	0.000550705	0.0288992	0.224821	None
TIMMDC1	-0.397627	10.3057	-5.44047	0.000552187	0.0288992	0.222224	None
POLR2A	-0.357545	8.86402	-5.43757	0.00055414	0.0288992	0.218813	None
CCDC103 /// FAM187A	0.459696	7.08377	5.43705	0.000554494	0.0288992	0.218197	None
VEGFB	-0.885386	9.11796	-5.43328	0.000557044	0.0288992	0.213764	None
POLR2J	-0.408627	9.3035	-5.43046	0.000558962	0.0288992	0.210443	None
LSAMP	0.63071	5.42534	5.4299	0.000559344	0.0288992	0.209782	None
FAM73A	-0.448061	5.81274	-5.4253	0.000562497	0.0288992	0.204351	None
CPA4	0.975284	8.63427	5.42325	0.000563901	0.0288992	0.201941	None
TMEM120A	0.373454	9.00771	5.42303	0.000564057	0.0288992	0.201674	None
IKZF5	-0.448467	5.78563	-5.42102	0.000565441	0.0288992	0.199305	None
WBP1 /// INO80B-WBP1	0.387048	9.47533	5.41935	0.000566592	0.0288992	0.19734	None
IRS2	-0.42461	8.57151	-5.41648	0.000568583	0.0288992	0.19395	None
DIEXF	0.378123	7.31974	5.41297	0.000571023	0.0288992	0.189811	None
RNF26	-0.556327	8.1143	-5.41252	0.000571339	0.0288992	0.189276	None
LEPROT	0.426817	10.352	5.4098	0.000573238	0.0288992	0.186067	None
MYEOV2	-0.372626	9.73477	-5.40769	0.000574719	0.0288992	0.183573	None
COASY	-0.416828	9.22068	-5.4075	0.000574857	0.0288992	0.18334	None
SLC39A9	0.881767	5.99201	5.40535	0.00057637	0.0288992	0.180799	None
SGOL2	-0.529769	5.50332	-5.40453	0.000576947	0.0288992	0.179832	None
SART3	-0.47176	8.6544	-5.39282	0.000585275	0.0289653	0.165974	None
SLC4A7	0.468434	9.6989	5.39206	0.000585819	0.0289653	0.165075	None
SYTL5	0.391037	4.18972	5.39124	0.000586408	0.0289653	0.164103	None
UPF3B	-0.442017	8.6918	-5.3902	0.000587152	0.0289653	0.162878	None
IGSF3	-0.40236	6.19611	-5.38762	0.000589016	0.0289653	0.159811	None
OLFM1	0.475494	6.22277	5.38663	0.000589731	0.0289653	0.158638	None
NDC80	-0.908492	7.97953	-5.38609	0.000590119	0.0289653	0.158001	None
CENPO	-0.474589	7.77194	-5.38357	0.000591947	0.0289653	0.155011	None
GTF3C5	-0.37203	8.94986	-5.38333	0.00059212	0.0289653	0.154728	None
MTMR11	-0.514013	6.82781	-5.38199	0.000593091	0.0289653	0.153142	None
STK32B	0.471286	7.70422	5.38056	0.00059413	0.0289653	0.15145	None
ULK2	-0.765934	5.2037	-5.37773	0.000596201	0.0289661	0.148083	None
TAP1	-0.391712	7.68069	-5.37207	0.000600353	0.0289661	0.141368	None
ZMYM3	-0.68021	7.32017	-5.37163	0.000600678	0.0289661	0.140845	None
TMEM38A	0.421847	5.83207	5.37155	0.000600735	0.0289661	0.140753	None
ZNF296	0.427537	6.77646	5.36949	0.000602254	0.0289661	0.138309	None
MCEE	0.549725	7.291	5.36799	0.000603364	0.0289661	0.136527	None
NDUFAB1	-0.47976	11.6323	-5.36681	0.000604241	0.0289661	0.135121	None
GPD1L	-0.50489	5.18948	-5.36226	0.000607627	0.0290514	0.129713	None
MSANTD3	0.453425	9.30843	5.36054	0.000608914	0.0290514	0.127665	None
PSPC1	-0.451245	8.76666	-5.35591	0.000612388	0.0290897	0.122158	None
DSN1	-0.471856	9.74652	-5.35561	0.000612613	0.0290897	0.121803	None
FAM83D	-0.535913	10.0757	-5.34963	0.000617138	0.0291785	0.114679	None
PVRL4	0.991211	4.55689	5.3493	0.000617388	0.0291785	0.114287	None
FAM8A1	0.354735	8.10024	5.34488	0.000620758	0.0292068	0.109016	None
IER3IP1	0.376254	9.48132	5.3447	0.000620896	0.0292068	0.108802	None
FBXL21	0.465867	4.96428	5.34038	0.000624206	0.0292263	0.103652	None
MAT2A	-0.555053	9.98837	-5.33933	0.000625015	0.0292263	0.102398	None
STAC	0.668826	6.16669	5.3366	0.000627117	0.0292263	0.0991478	None
BCL3	-0.423623	8.67696	-5.33562	0.000627881	0.0292263	0.0979691	None
MVK	-0.379277	8.45366	-5.33414	0.000629021	0.0292263	0.0962125	None
POM121 /// POMZP3 /// POM121C	-0.386182	7.96519	-5.33283	0.00063004	0.0292263	0.0946449	None
ERCC5 /// BIVM-ERCC5	0.369509	6.91107	5.32689	0.000634671	0.029372	0.0875505	None
NFKBIA	0.644349	10.3452	5.32506	0.000636105	0.029372	0.0853647	None
ZNF561	0.486002	6.45019	5.32057	0.000639639	0.0294027	0.079997	None
C9orf72	-0.378548	6.10324	-5.3205	0.000639698	0.0294027	0.0799091	None
FAM63B	0.482317	7.28518	5.31506	0.000644011	0.0294967	0.0733975	None
UBL4A	-0.356394	9.16972	-5.31422	0.00064468	0.0294967	0.0723918	None
MKNK2	0.398725	8.44648	5.31228	0.000646223	0.0295001	0.0700765	None
CXCL1 /// CXCL2	-0.449873	8.25185	-5.30749	0.000650058	0.0295686	0.0643419	None
TMEM2	0.614999	10.3985	5.30674	0.000650669	0.0295686	0.0634324	None
LOC100132167	0.455219	6.00263	5.30251	0.000654075	0.0296316	0.0583725	None
GPNMB	0.87623	5.85172	5.3005	0.000655704	0.0296316	0.055961	None
DDX46	-0.38183	10.1829	-5.29384	0.00066113	0.0296316	0.0479728	None
NAPG	0.415481	8.46827	5.29122	0.000663279	0.0296316	0.0448272	None
WDR45	0.385617	8.68383	5.29082	0.000663608	0.0296316	0.0443465	None
TRAPPC6B	0.35944	8.21734	5.28645	0.000667218	0.0296316	0.0390876	None
FANCD2	-0.572744	7.04214	-5.28629	0.000667348	0.0296316	0.0388988	None
METTL10	-0.42315	7.93157	-5.2854	0.000668083	0.0296316	0.0378311	None
CAT	0.768488	8.44754	5.28388	0.000669341	0.0296316	0.0360075	None
SUSD2	-1.12221	8.64566	-5.28276	0.000670273	0.0296316	0.0346571	Down
SLC25A10	-0.820764	7.77154	-5.28	0.00067257	0.0296316	0.0313407	None
FEM1A	-0.939396	6.97818	-5.27938	0.000673086	0.0296316	0.0305968	None
FOXA3	-0.395108	5.90793	-5.27879	0.000673576	0.0296316	0.0298913	None
ATF7IP	0.424133	7.67589	5.27824	0.000674041	0.0296316	0.0292218	None
ETS1	0.887969	9.0368	5.27807	0.000674183	0.0296316	0.0290183	None
EEPD1	-0.436703	6.6816	-5.27556	0.000676285	0.0296591	0.0259984	None
KPNB1	-0.678705	11.0064	-5.26862	0.000682137	0.0298506	0.0176425	None
KLRC1 /// KLRC2	0.436821	3.0796	5.26403	0.000686036	0.0299559	0.0121142	None
SMIM4	-0.388368	8.29783	-5.26023	0.000689282	0.0300324	0.00753477	None
LACTB	0.690665	10.1216	5.25727	0.000691823	0.0300529	0.00396531	None
HEYL	-0.475552	4.90913	-5.25605	0.000692877	0.0300529	0.00248927	None
XPC	0.665991	9.41819	5.25405	0.000694602	0.0300529	7.64193e-05	None
DDX58	0.537002	6.76613	5.25273	0.000695737	0.0300529	-0.00150811	None
CENPI	-0.417692	6.38143	-5.24357	0.000703721	0.030259	-0.0125799	None
SNORD17	-0.445683	8.59457	-5.24342	0.000703851	0.030259	-0.0127592	None
REC8	-0.381348	5.56127	-5.23765	0.000708925	0.030259	-0.0197309	None
RABGAP1L	-0.987853	5.67936	-5.23562	0.000710722	0.030259	-0.0221886	None
PRC1	-0.604742	11.1816	-5.23501	0.000711267	0.030259	-0.0229322	None
NTNG2	0.400551	6.36722	5.23087	0.00071494	0.030259	-0.0279318	None
DDX11	-0.363967	8.2374	-5.23068	0.00071511	0.030259	-0.0281631	None
SPACA6	-0.379505	7.11306	-5.2306	0.000715181	0.030259	-0.0282595	None
ST8SIA5	0.401139	6.31702	5.23043	0.000715337	0.030259	-0.0284708	None
ARHGEF4	0.537323	6.17908	5.22771	0.000717767	0.030259	-0.031763	None
HOXB8	-0.38154	6.93951	-5.22629	0.000719036	0.030259	-0.033478	None
SLC16A2	0.49211	7.34371	5.22473	0.000720442	0.030259	-0.0353739	None
CHM	0.344031	8.62203	5.2243	0.000720828	0.030259	-0.0358945	None
PTPN14	0.465953	4.44576	5.22344	0.000721601	0.030259	-0.0369343	None
RBM22	-0.403181	8.17514	-5.21693	0.00072749	0.0303613	-0.0448272	None
GRB14	-0.834626	8.84365	-5.21454	0.000729661	0.0303613	-0.0477206	None
DNMBP	-0.403559	7.70532	-5.21332	0.00073078	0.0303613	-0.0492078	None
ARHGEF3	-0.371738	7.37529	-5.21214	0.00073186	0.0303613	-0.0506431	None
PELI2	-0.696614	5.29301	-5.20976	0.000734032	0.0303613	-0.0535211	None
TNFRSF10C	0.446745	6.55479	5.20941	0.00073436	0.0303613	-0.0539547	None
DMRTA1	0.514262	5.41026	5.20802	0.000735633	0.0303613	-0.0556363	None
DKK3	0.832771	8.39922	5.20712	0.000736461	0.0303613	-0.0567293	None
AK2	-0.33844	8.89123	-5.2046	0.000738785	0.0303613	-0.0597889	None
CHSY1	-0.562679	6.37994	-5.20363	0.000739685	0.0303613	-0.0609711	None
SDHB	-0.371735	10.2555	-5.2013	0.000741842	0.0303613	-0.0638005	None
CDC25C	-0.643277	7.65867	-5.20002	0.000743033	0.0303613	-0.0653587	None
2010-09-01	-0.485608	6.90586	-5.19717	0.000745684	0.0303613	-0.0688182	None
RBM24	-0.957356	5.53335	-5.19661	0.000746209	0.0303613	-0.0695018	None
SLC48A1	0.402109	7.08572	5.19604	0.000746744	0.0303613	-0.0701976	None
NELFCD	-0.557136	9.14049	-5.19446	0.000748224	0.0303613	-0.0721222	None
ACD	-0.381861	8.82948	-5.19172	0.000750791	0.030404	-0.075449	None
EDEM3	0.415032	7.14822	5.18913	0.000753235	0.0304416	-0.0786067	None
ZBED8	-0.353981	6.07989	-5.18396	0.000758129	0.0305779	-0.0848992	None
CHIC1	0.824593	7.94592	5.18095	0.000760995	0.0306319	-0.088566	None
ALDH6A1	-0.382951	6.42726	-5.17509	0.000766613	0.0307553	-0.095714	None
DNAJC19	-0.409069	6.72574	-5.17456	0.000767121	0.0307553	-0.0963585	None
ADAM23	0.668944	6.08982	5.17238	0.000769229	0.0307783	-0.0990252	None
DUSP8 /// GLUD1P3 /// LOC101927562	0.503364	5.47409	5.16719	0.000774252	0.030901	-0.105353	None
DHPS	-0.524011	8.4327	-5.16604	0.00077537	0.030901	-0.106755	None
APBB1IP	0.456579	7.85496	5.16264	0.00077869	0.0309234	-0.110908	None
BUB1B	-0.702108	9.34057	-5.16097	0.000780332	0.0309234	-0.112957	None
PC	-0.810928	7.1345	-5.16044	0.000780851	0.0309234	-0.113603	None
SKAP2	-0.347651	9.14814	-5.15917	0.000782091	0.0309234	-0.115145	None
CPS1	-0.33378	5.60951	-5.15562	0.000785595	0.0309947	-0.119492	None
SPOPL	-1.05678	6.34641	-5.15318	0.000788005	0.0309947	-0.122471	Down
HNRNPH3	-0.370757	9.17161	-5.15076	0.00079041	0.0309947	-0.125434	None
C10orf107	0.61531	4.87936	5.15013	0.000791035	0.0309947	-0.126202	None
CXorf38	-0.415719	8.07087	-5.14912	0.000792041	0.0309947	-0.127438	None
FAM169A	-0.494497	6.74196	-5.14801	0.000793153	0.0309947	-0.128803	None
NAV2	0.44713	7.5366	5.14546	0.000795703	0.0310059	-0.131924	None
MRPS9	-0.790786	8.63028	-5.14464	0.000796527	0.0310059	-0.13293	None
NFS1	-1.24771	8.64777	-5.1422	0.000798977	0.0310275	-0.135918	Down
AGR2	-1.20636	9.86013	-5.13969	0.000801507	0.0310275	-0.138993	Down
CDK18	0.459061	6.43358	5.13748	0.000803737	0.0310275	-0.141695	None
PCDHAC1	0.378571	5.52135	5.13609	0.000805153	0.0310275	-0.143408	None
RINL	0.806262	5.35175	5.13069	0.000810651	0.0310275	-0.150027	None
WASH2P	-0.348935	8.52188	-5.12973	0.000811634	0.0310275	-0.151207	None
SNRPA	-0.434393	9.72214	-5.12972	0.000811644	0.0310275	-0.151219	None
ARL14EP	0.332285	8.81189	5.12805	0.000813355	0.0310275	-0.153268	None
ELF1	-0.369114	7.97115	-5.12688	0.000814561	0.0310275	-0.154709	None
ZNF714	-0.33936	3.44222	-5.12631	0.000815142	0.0310275	-0.155402	None
CPNE4	-0.478676	5.84607	-5.12594	0.000815527	0.0310275	-0.155862	None
PRKAR2A	-0.445792	7.30332	-5.12414	0.000817373	0.0310275	-0.158062	None
PGM1	-0.425226	9.66766	-5.12327	0.000818273	0.0310275	-0.159133	None
EBP	-0.513374	10.5378	-5.12285	0.000818708	0.0310275	-0.15965	None
RETSAT	0.372882	8.78987	5.1194	0.000822283	0.0311043	-0.163889	None
DSTYK	0.371425	7.06633	5.11226	0.000829739	0.0312923	-0.172673	None
GPC1	0.34793	9.54936	5.11165	0.00083037	0.0312923	-0.173413	None
LCORL	-0.357299	6.40004	-5.10928	0.000832869	0.0312963	-0.176337	None
ACBD7	0.639427	5.4499	5.10844	0.000833752	0.0312963	-0.177369	None
RNF182	0.378869	8.37834	5.10601	0.000836311	0.0312963	-0.180351	None
TMEM39A	0.386269	6.99473	5.10558	0.000836773	0.0312963	-0.180889	None
MCM5	-0.37198	8.97253	-5.10417	0.000838265	0.0312963	-0.182624	None
GPX1	0.670267	11.4204	5.10158	0.00084102	0.0313409	-0.185817	None
ATRN	0.384961	7.84949	5.0979	0.000844939	0.0313901	-0.190343	None
SEC11A	0.328362	12.4029	5.0972	0.000845686	0.0313901	-0.191203	None
ZNF280D /// LOC145783	0.4688	6.36781	5.0923	0.000850951	0.0313901	-0.197245	None
EDC3	-0.370224	7.32774	-5.09229	0.000850964	0.0313901	-0.19726	None
SDHAF1	-0.562726	8.75298	-5.0917	0.000851597	0.0313901	-0.197984	None
BCL7B	-0.349959	8.0843	-5.09159	0.000851719	0.0313901	-0.198124	None
SDAD1	0.39853	6.68862	5.0893	0.000854195	0.0314237	-0.20095	None
USP4	-0.361052	8.29617	-5.08232	0.000861786	0.031645	-0.209565	None
SET	-0.321157	12.0533	-5.07728	0.000867311	0.0317052	-0.215789	None
PTGFRN	-1.09284	6.30736	-5.07695	0.000867677	0.0317052	-0.2162	Down
OAS2 /// OAS3	-0.65612	6.52499	-5.07651	0.000868161	0.0317052	-0.216743	None
ATAD5	-0.473685	6.80263	-5.07085	0.000874418	0.0317986	-0.223737	None
PFKP	0.34829	11.8249	5.07022	0.000875117	0.0317986	-0.224516	None
THEMIS2	0.485785	4.5999	5.06759	0.000878047	0.0317986	-0.227772	None
ASAP1-IT2	0.372873	7.52668	5.06749	0.000878159	0.0317986	-0.227896	None
ENC1	0.360458	10.0121	5.06706	0.000878634	0.0317986	-0.228423	None
STOX2	0.687806	7.58208	5.06246	0.000883793	0.0318281	-0.234127	None
CDCA7	-0.685968	7.97385	-5.06238	0.000883882	0.0318281	-0.234225	None
RFNG	-0.516976	6.63801	-5.06209	0.000884203	0.0318281	-0.234578	None
ASAH1	0.347231	9.799	5.05763	0.000889235	0.0319283	-0.240107	None
PTRH2	0.384112	10.7734	5.0568	0.000890165	0.0319283	-0.241125	None
ORM2	0.349299	4.28006	5.05427	0.000893037	0.0319742	-0.244264	None
DUSP12	-0.324802	9.87791	-5.05208	0.00089553	0.0320065	-0.246981	None
ZDHHC13	-1.19628	7.8919	-5.05035	0.000897508	0.0320202	-0.24913	Down
PCBP4	-0.581001	7.38858	-5.04561	0.000902932	0.0321565	-0.255001	None
TNFRSF21	0.831654	10.4294	5.04296	0.000905993	0.0322084	-0.2583	None
ZNF326	-0.371439	9.19231	-5.04057	0.000908752	0.0322495	-0.261264	None
DLGAP5	-0.411509	9.77378	-5.03343	0.000917061	0.032441	-0.270135	None
CCSAP	-0.334536	7.94443	-5.03316	0.00091738	0.032441	-0.270474	None
MR1	0.924341	7.7012	5.0291	0.000922133	0.0325518	-0.275512	None
IL1A	0.351208	4.0989	5.0199	0.000933031	0.0328004	-0.286966	None
LPCAT3	0.339966	9.2105	5.01968	0.000933296	0.0328004	-0.287243	None
SH3YL1	0.516132	7.16243	5.01902	0.000934076	0.0328004	-0.288058	None
ZNF469	0.54752	7.66333	5.01456	0.000939412	0.0328767	-0.293612	None
POLDIP3	-0.543863	7.72773	-5.01447	0.00093952	0.0328767	-0.293724	None
FGF2	0.318999	8.71641	5.00601	0.000949739	0.0331765	-0.304274	None
WDR73	-0.351149	9.57756	-5.00405	0.000952122	0.033202	-0.306719	None
CLDN4	0.487518	6.30977	5.00083	0.000956057	0.0332814	-0.310741	None
H6PD	-0.410627	6.14035	-4.99335	0.000965248	0.0333788	-0.320075	None
MPHOSPH9	-0.495524	7.76425	-4.99332	0.000965291	0.0333788	-0.320117	None
RXRA	-0.374047	6.36967	-4.99253	0.000966268	0.0333788	-0.321104	None
CENPL	-0.341411	8.11128	-4.99194	0.000966992	0.0333788	-0.321835	None
PCDHGC3 /// PCDHGB4 /// PCDHGA8 /// PCDHGA12 /// PCDHGC5 /// PCDHGC4 /// PCDHGB7 /// PCDHGB6 /// PCDHGB5 /// PCDHGB3 /// PCDHGB2 /// PCDHGB1 /// PCDHGA11 /// PCDHGA10 /// PCDHGA9 /// PCDHGA7 /// PCDHGA6 /// PCDHGA5 /// PCDHGA4 /// PCDHGA3 /// PCDHGA2 /// PCDHGA1	0.597764	8.01098	4.9918	0.000967165	0.0333788	-0.32201	None
CTU2	-0.436532	7.53484	-4.98973	0.000969739	0.0334102	-0.324602	None
NBEA	0.893738	6.76308	4.98481	0.000975876	0.0335075	-0.330758	None
CNTNAP3 /// CNTNAP3P2 /// CNTNAP3B /// LOC100289279 /// LOC102725253 /// LOC105369234	-0.524913	8.67182	-4.98479	0.000975899	0.0335075	-0.330781	None
FLNA	-0.334454	10.7151	-4.97929	0.000982811	0.0336873	-0.337667	None
PECR	-0.339882	7.08106	-4.97656	0.000986254	0.0337255	-0.34108	None
NR2F1	-0.474773	6.85425	-4.97575	0.000987284	0.0337255	-0.342099	None
IP6K1	-0.401192	5.82173	-4.97364	0.000989953	0.0337592	-0.344733	None
TIMM44	-0.357202	8.05262	-4.96903	0.000995838	0.0338708	-0.350518	None
PIM2	0.392464	6.98545	4.96843	0.000996595	0.0338708	-0.35126	None
ZMYM6NB	0.385417	8.27983	4.96272	0.00100394	0.0340187	-0.358424	None
BNIP2	-0.366628	8.72366	-4.96183	0.00100509	0.0340187	-0.359543	None
ASTN2	0.900912	6.76143	4.9611	0.00100603	0.0340187	-0.360457	None
RBM18	0.376938	7.96823	4.95595	0.00101271	0.0341872	-0.366921	None
DIS3L	-0.670013	9.08031	-4.95435	0.0010148	0.0342003	-0.368934	None
PMAIP1	0.563769	9.51255	4.95083	0.00101941	0.0342136	-0.373351	None
MXI1	0.378324	8.76307	4.95046	0.00101989	0.0342136	-0.373818	None
LAMB1	0.400011	11.1547	4.95	0.0010205	0.0342136	-0.374397	None
RNASEK /// RNASEK-C17orf49	0.32267	11.7996	4.94885	0.00102201	0.0342136	-0.375847	None
DPYSL2	-0.365188	7.6596	-4.9409	0.00103253	0.0344808	-0.38584	None
CDK2AP1	-0.326256	11.8427	-4.93647	0.00103843	0.0344808	-0.39141	None
MORN2	-0.353629	8.36289	-4.93628	0.00103869	0.0344808	-0.391648	None
DCDC2	0.750664	8.74194	4.93515	0.0010402	0.0344808	-0.393074	None
METAP2	-0.346432	8.27776	-4.93428	0.00104138	0.0344808	-0.394174	None
SERTAD4	-0.403056	6.24956	-4.93415	0.00104155	0.0344808	-0.394338	None
ANKLE2	-0.322886	8.7293	-4.93288	0.00104325	0.0344808	-0.395931	None
STC2	0.360164	8.6451	4.9323	0.00104404	0.0344808	-0.396666	None
CDNF	0.421682	4.64335	4.93125	0.00104545	0.0344808	-0.397983	None
CXADR	0.496155	8.91982	4.92883	0.00104872	0.0344905	-0.401038	None
EIF3M	0.345029	11.6065	4.92849	0.00104917	0.0344905	-0.401459	None
CDRT4 /// TVP23C-CDRT4	-0.345859	6.42598	-4.92411	0.00105513	0.0345917	-0.406989	None
PARD6A	-0.51783	6.30779	-4.92369	0.0010557	0.0345917	-0.407514	None
MTHFD1	-0.314789	10.5044	-4.91757	0.00106407	0.0347565	-0.415236	None
RRM2	-1.06552	10.337	-4.91749	0.00106419	0.0347565	-0.415338	Down
MLST8	-0.822486	8.68324	-4.91468	0.00106805	0.0347787	-0.418877	None
ANAPC15	-0.34292	8.99048	-4.91448	0.00106833	0.0347787	-0.419134	None
DSE	0.514406	8.80313	4.91121	0.00107285	0.0348383	-0.423262	None
CNTNAP3	-0.755956	7.64097	-4.91065	0.00107363	0.0348383	-0.423969	None
PHGDH	-0.95115	9.04756	-4.90749	0.00107802	0.0348528	-0.427956	None
LRRC75A-AS1	0.31969	12.5591	4.90567	0.00108057	0.0348528	-0.430265	None
SNX11	-0.442277	7.96428	-4.90539	0.00108096	0.0348528	-0.430615	None
ESPL1	-0.753534	8.36454	-4.90535	0.00108102	0.0348528	-0.430671	None
ZNF654	0.431254	7.06798	4.8989	0.00109007	0.0350882	-0.438817	None
UNKL	0.388776	10.2106	4.89699	0.00109276	0.0351188	-0.441234	None
PLCH1	-0.628711	7.70491	-4.89473	0.00109598	0.0351338	-0.444105	None
SMARCA2	-0.365666	9.35924	-4.89364	0.00109752	0.0351338	-0.445475	None
TEAD1	-0.384291	10.4564	-4.89297	0.00109848	0.0351338	-0.446331	None
HLA-DPB1	0.395087	4.7794	4.89131	0.00110084	0.0351534	-0.448429	None
SPATA17	0.539728	6.08708	4.88875	0.0011045	0.0351777	-0.45167	None
CHMP2A	-0.563743	10.7598	-4.88714	0.00110681	0.0351777	-0.453716	None
CERCAM	-1.06447	5.11259	-4.8871	0.00110685	0.0351777	-0.453756	Down
AP5M1	0.313772	8.82678	4.88546	0.00110922	0.0351972	-0.455844	None
TMEM79	-0.381176	6.74282	-4.8808	0.00111594	0.0352265	-0.461744	None
NUMBL	0.834094	8.94177	4.88077	0.00111598	0.0352265	-0.461781	None
TEX19	0.326524	5.4387	4.88025	0.00111673	0.0352265	-0.462443	None
NAV3	0.980221	8.42565	4.87897	0.00111859	0.0352265	-0.464063	None
RIF1	-0.362502	9.16027	-4.87875	0.00111891	0.0352265	-0.464349	None
TRIOBP	0.562506	7.27382	4.87719	0.00112118	0.0352425	-0.466324	None
SLC6A6	-0.448648	6.72756	-4.87466	0.00112487	0.0352891	-0.469538	None
PHF10	-0.584423	8.00998	-4.87376	0.00112617	0.0352891	-0.470671	None
MTO1	-0.331523	8.01277	-4.87085	0.00113043	0.0353178	-0.474364	None
CCDC51	-0.454582	8.11073	-4.86981	0.00113196	0.0353178	-0.475685	None
LPCAT2	-0.381776	6.8478	-4.86954	0.00113236	0.0353178	-0.476032	None
CHMP6	-0.375671	7.78474	-4.86478	0.00113938	0.0354817	-0.482076	None
REEP2	0.373908	7.95462	4.86247	0.00114282	0.0355336	-0.48502	None
C1orf228	0.476761	4.90523	4.86023	0.00114614	0.0355424	-0.487861	None
RNF220	-0.355192	8.63428	-4.85988	0.00114666	0.0355424	-0.488303	None
GMCL1	-0.357987	5.77445	-4.85871	0.00114841	0.0355424	-0.489794	None
WDR59	0.343197	9.14906	4.85523	0.00115362	0.0356271	-0.494222	None
ING2	-0.442617	7.98166	-4.85451	0.0011547	0.0356271	-0.495132	None
FUCA1	0.412542	7.55484	4.85248	0.00115775	0.0356532	-0.497717	None
ZNF735	0.316525	5.13855	4.85159	0.00115909	0.0356532	-0.498848	None
TCF3	0.321066	8.5584	4.84701	0.00116603	0.0356766	-0.504682	None
ZAK	0.349715	8.93934	4.84684	0.00116628	0.0356766	-0.504898	None
EBI3	1.3355	7.04177	4.84581	0.00116785	0.0356766	-0.506214	Up
ZMYM2	0.325554	7.78787	4.84532	0.0011686	0.0356766	-0.506839	None
PYROXD1	-0.402738	6.63358	-4.84523	0.00116874	0.0356766	-0.506952	None
NPAS1	0.337277	7.30225	4.84377	0.00117095	0.0356901	-0.508807	None
G6PD	-0.367366	11.3789	-4.84094	0.00117529	0.0356942	-0.512422	None
TYMSOS	0.414965	8.14947	4.83995	0.0011768	0.0356942	-0.513682	None
B3GALT6	0.332757	7.46057	4.83877	0.00117861	0.0356942	-0.515186	None
TUBB	-0.759037	11.623	-4.83861	0.00117886	0.0356942	-0.515387	None
SCAF11	-0.320292	8.90975	-4.8375	0.00118056	0.0356942	-0.516801	None
HBP1	0.348051	9.04029	4.83673	0.00118175	0.0356942	-0.517788	None
UBLCP1	0.436981	9.35314	4.83477	0.00118477	0.0357177	-0.520283	None
LAMP1	0.428897	9.50833	4.83278	0.00118786	0.0357177	-0.522828	None
LRPPRC	0.312602	10.9449	4.83274	0.00118792	0.0357177	-0.522877	None
MPST	-0.400898	9.18499	-4.83162	0.00118964	0.0357177	-0.524299	None
OR12D3	0.416286	3.96601	4.83009	0.00119203	0.0357359	-0.526259	None
STRA13	-0.344246	11.3595	-4.82677	0.0011972	0.0358374	-0.530493	None
PCSK9	-0.547833	7.44586	-4.82127	0.00120582	0.0360419	-0.53752	None
SYNDIG1	0.381426	6.07633	4.81967	0.00120835	0.0360638	-0.539569	None
SNAP25	-0.373181	7.84038	-4.8153	0.00121526	0.0362161	-0.545146	None
SUCLG1	-0.366224	8.87425	-4.80642	0.00122945	0.0365849	-0.556514	None
SOCS2	1.05779	9.03262	4.80501	0.00123172	0.036598	-0.558315	Up
SOS2	-0.848717	5.40488	-4.8028	0.00123529	0.0366499	-0.561149	None
TUSC2	-0.374897	8.31199	-4.80048	0.00123905	0.0366895	-0.564123	None
SKP2	-1.17997	6.93074	-4.79972	0.00124027	0.0366895	-0.565093	Down
C6orf226	-0.507108	7.89043	-4.79591	0.00124647	0.036773	-0.569971	None
TCF4	-0.604777	7.29302	-4.79554	0.00124707	0.036773	-0.570446	None
IFI30	0.836852	8.77447	4.79462	0.00124859	0.036773	-0.571635	None
SRCAP	-0.80441	7.08278	-4.79188	0.00125307	0.036851	-0.575145	None
PLOD2	-0.326236	11.1505	-4.78724	0.00126071	0.0369971	-0.581095	None
TPMT	0.368363	7.87456	4.78563	0.00126338	0.0369971	-0.583169	None
EZR	-0.911643	10.0054	-4.78552	0.00126357	0.0369971	-0.58331	None
DHODH	-0.353241	7.69867	-4.7843	0.00126558	0.037002	-0.584869	None
AGPAT3	-0.568313	7.64745	-4.78239	0.00126876	0.0370269	-0.587329	None
LINC01069	0.419969	4.4477	4.78088	0.00127127	0.0370269	-0.589266	None
PPP1R14B	-0.322187	11.4908	-4.77989	0.00127293	0.0370269	-0.590541	None
ABHD12	0.309996	10.312	4.77872	0.00127487	0.0370269	-0.592033	None
PCMTD1	0.391749	8.52209	4.77826	0.00127565	0.0370269	-0.592629	None
H2AFZ	-0.406559	13.2085	-4.77098	0.00128789	0.037237	-0.601985	None
TPI1	-0.789902	12.537	-4.76946	0.00129047	0.037237	-0.603941	None
PTK2	0.325382	8.88917	4.76876	0.00129166	0.037237	-0.604846	None
SNX5	0.371665	10.2972	4.76874	0.00129168	0.037237	-0.604863	None
PPARGC1A	-0.983974	5.17094	-4.76796	0.00129301	0.037237	-0.605867	None
DGKA	0.557203	7.27219	4.76737	0.00129401	0.037237	-0.606626	None
DNM1L	-0.317397	9.58391	-4.76563	0.00129697	0.0372398	-0.608865	None
DDHD2	-0.372052	7.53177	-4.76468	0.00129859	0.0372398	-0.610087	None
TRAPPC2 /// TRAPPC2B	0.404488	9.13756	4.76405	0.00129966	0.0372398	-0.610899	None
APOL2	-1.03166	6.4519	-4.76215	0.00130291	0.0372796	-0.613344	Down
RABGGTB	-0.328183	9.53477	-4.75986	0.00130685	0.0373327	-0.616301	None
DRAP1	0.339727	10.4022	4.75891	0.00130849	0.0373327	-0.617526	None
ODC1	-0.977432	10.1463	-4.75764	0.00131067	0.0373419	-0.619158	None
RFPL4A /// RFPL4AL1	0.411947	4.68061	4.75163	0.00132106	0.0373875	-0.626897	None
SIRT4	0.550947	5.23388	4.75108	0.00132202	0.0373875	-0.627609	None
KIF15	-0.636333	7.05743	-4.75063	0.00132281	0.0373875	-0.628193	None
CHST15	0.412704	7.14797	4.749	0.00132565	0.0373875	-0.630294	None
SARM1	0.61468	5.35405	4.74889	0.00132584	0.0373875	-0.630432	None
DDX60L	0.765295	8.1675	4.74838	0.00132673	0.0373875	-0.631091	None
OGG1	-0.340633	7.50855	-4.74797	0.00132744	0.0373875	-0.631618	None
KRT39	0.393053	4.23543	4.74724	0.00132872	0.0373875	-0.632562	None
OR8G1 /// OR8G5	-0.343595	3.16681	-4.74707	0.00132902	0.0373875	-0.632781	None
NCAPD2	-0.544229	8.87275	-4.74323	0.00133576	0.037438	-0.63774	None
BCL2L1	-0.363998	7.86754	-4.74235	0.0013373	0.037438	-0.638867	None
HSPA1B	-0.333379	9.81539	-4.74224	0.0013375	0.037438	-0.639017	None
KMT2C /// BAGE2 /// LOC101929815 /// LOC105379278	-0.706203	6.19623	-4.74106	0.00133957	0.037438	-0.640532	None
MT2A	-0.390345	12.1333	-4.74075	0.00134013	0.037438	-0.640943	None
AQP11	1.14765	7.19375	4.73765	0.00134561	0.0374966	-0.644942	Up
THG1L	-0.370378	8.48025	-4.73745	0.00134597	0.0374966	-0.645198	None
HEATR5A	0.383025	9.53344	4.73088	0.00135768	0.0377065	-0.65369	None
ENDOD1	0.388719	5.84825	4.7292	0.00136068	0.0377065	-0.655859	None
ITGBL1	-0.605479	4.89433	-4.72624	0.001366	0.0377065	-0.659683	None
EIF3A	0.41754	10.6948	4.72568	0.00136701	0.0377065	-0.660408	None
NPRL3	-0.433977	8.5899	-4.72481	0.0013686	0.0377065	-0.661542	None
STX2	-0.320134	9.3847	-4.72367	0.00137064	0.0377065	-0.663006	None
CC2D1A	-0.498591	6.5725	-4.72338	0.00137118	0.0377065	-0.663392	None
NCSTN	0.568641	9.35456	4.72312	0.00137164	0.0377065	-0.663719	None
ESCO2	-0.524925	9.83324	-4.72226	0.0013732	0.0377065	-0.664832	None
MEMO1 /// MEMO1 /// DPY30	-1.15371	9.49121	-4.72128	0.00137499	0.0377065	-0.666111	Down
TKT	-1.07983	7.89723	-4.72069	0.00137606	0.0377065	-0.666871	Down
PTPN18	-0.30517	6.3429	-4.7197	0.00137785	0.0377065	-0.668144	None
GTF2IRD2 /// GTF2IRD2B	0.474268	6.02677	4.71967	0.0013779	0.0377065	-0.668186	None
NASP	-0.31473	10.6463	-4.71743	0.00138199	0.0377669	-0.67109	None
CHEK2 /// LOC101929031 /// LOC102723841 /// LOC102723890	0.366041	7.90302	4.71391	0.00138844	0.0378735	-0.67565	None
TCOF1	-0.380434	7.95172	-4.7128	0.00139046	0.0378735	-0.67708	None
CEP120	0.391209	7.56165	4.70937	0.00139678	0.0378735	-0.681527	None
UBE2W	0.347433	7.83238	4.70786	0.00139958	0.0378735	-0.683491	None
ENO2	0.320873	8.3369	4.70772	0.00139984	0.0378735	-0.683674	None
ZMPSTE24	-0.30905	10.7577	-4.70716	0.00140088	0.0378735	-0.684398	None
PPIA	-0.92215	7.83013	-4.70714	0.00140091	0.0378735	-0.684418	None
MTHFR	0.368841	7.17571	4.70679	0.00140156	0.0378735	-0.684877	None
UPK1B	-0.443728	7.05156	-4.70609	0.00140286	0.0378735	-0.685785	None
ATP10A	-0.479619	6.72214	-4.70395	0.00140684	0.0379175	-0.688562	None
HERC1	-0.384016	6.46266	-4.70258	0.00140939	0.0379175	-0.690338	None
FAM81A	-0.331223	7.28778	-4.70216	0.00141017	0.0379175	-0.690882	None
UBALD2	-0.477397	7.26725	-4.70116	0.00141204	0.0379175	-0.692182	None
ZNF711	0.352643	7.10701	4.69957	0.00141502	0.0379467	-0.694246	None
KRT81	-0.392685	13.438	-4.69835	0.0014173	0.0379571	-0.695825	None
XKR8 /// RNF216P1	0.321206	8.28851	4.68792	0.00143702	0.0382094	-0.709376	None
GATSL3	0.358862	6.96219	4.68756	0.00143769	0.0382094	-0.709838	None
GCHFR	-0.38285	6.0905	-4.68678	0.00143918	0.0382094	-0.710854	None
KRT19	0.617111	10.5229	4.68626	0.00144017	0.0382094	-0.711526	None
KLHDC7A	0.517977	7.21876	4.68571	0.00144122	0.0382094	-0.712242	None
ANKDD1A	0.463334	4.99799	4.68554	0.00144155	0.0382094	-0.712466	None
TMEM206	-0.336123	8.83897	-4.68516	0.00144228	0.0382094	-0.71296	None
ARF5	-0.372719	10.1513	-4.68514	0.00144232	0.0382094	-0.712991	None
CDC16	-0.34519	9.4273	-4.68321	0.00144601	0.0382094	-0.715494	None
TAPBPL	0.327269	7.40312	4.68252	0.00144732	0.0382094	-0.716385	None
EFCAB11	-1.28989	7.40548	-4.68185	0.00144862	0.0382094	-0.717265	Down
ANXA1	0.323345	13.176	4.68067	0.00145089	0.0382094	-0.718797	None
CMC2	-0.311026	10.3288	-4.67729	0.0014574	0.0382094	-0.723194	None
GINS4	-0.615146	8.74537	-4.67664	0.00145866	0.0382094	-0.724037	None
USP25	-0.657803	6.96982	-4.67623	0.00145945	0.0382094	-0.72457	None
LAP3	-0.473492	8.40297	-4.67546	0.00146096	0.0382094	-0.725584	None
C3	0.517159	9.23526	4.67508	0.00146169	0.0382094	-0.726073	None
C12orf76	0.478284	7.11359	4.67378	0.00146421	0.0382094	-0.727761	None
RNF130	-0.304557	9.19936	-4.67283	0.00146605	0.0382094	-0.728997	None
FAM92A1	-0.868081	7.77284	-4.67257	0.00146657	0.0382094	-0.729347	None
CCDC58	-0.353126	7.51088	-4.67097	0.00146968	0.0382094	-0.731425	None
WNT10B	0.484679	7.20155	4.67062	0.00147037	0.0382094	-0.731882	None
LPXN	0.628462	6.18837	4.67057	0.00147047	0.0382094	-0.731949	None
FAM136A	-0.322024	9.57068	-4.66384	0.00148367	0.0384551	-0.740719	None
PRPF4	-0.403506	9.97569	-4.66346	0.00148442	0.0384551	-0.741213	None
OTUD7B	-0.378188	7.04786	-4.66282	0.00148567	0.0384551	-0.742039	None
CCNE1	-0.459171	6.42879	-4.66152	0.00148824	0.0384721	-0.743736	None
PRELID3B	-0.341218	8.75214	-4.65886	0.00149351	0.0385588	-0.747206	None
CTNNA1	-0.304739	9.5875	-4.65374	0.00150373	0.0387726	-0.753894	None
PPP4R1	-0.314214	9.0015	-4.64975	0.00151173	0.0389289	-0.759101	None
MDM1	-0.617063	6.57465	-4.64323	0.00152491	0.0392044	-0.767623	None
SPANXB1 /// LOC105369237	0.522524	3.8073	4.64179	0.00152784	0.0392044	-0.769505	None
RRM2B	0.491068	9.77047	4.64157	0.00152828	0.0392044	-0.76979	None
ANP32E	-0.665682	8.86313	-4.64053	0.00153039	0.0392084	-0.771142	None
FBXO43	-0.536855	6.64354	-4.63705	0.00153751	0.0393249	-0.775697	None
AKAP5	0.51308	4.16557	4.63639	0.00153885	0.0393249	-0.776555	None
AGL	-0.399064	8.49699	-4.63505	0.0015416	0.0393451	-0.778309	None
FAM122B	-0.485027	8.9993	-4.63266	0.00154654	0.0393888	-0.781446	None
LINC00313	-0.323241	5.87991	-4.63232	0.00154723	0.0393888	-0.781889	None
SEC31A	0.376073	9.56517	4.62889	0.00155432	0.039519	-0.786372	None
MRPL37	-0.38891	10.2463	-4.62705	0.00155814	0.0395415	-0.788784	None
CHAF1A	-0.493441	7.89703	-4.62559	0.00156119	0.0395415	-0.790703	None
NOCT	0.369262	6.27367	4.6247	0.00156304	0.0395415	-0.791867	None
DENND4A	0.353021	6.14924	4.62468	0.00156308	0.0395415	-0.791889	None
CDK2	-0.464634	8.53618	-4.62345	0.00156565	0.0395569	-0.793507	None
ZNF239	0.360597	6.939	4.62205	0.00156857	0.0395807	-0.795332	None
HES2	0.365048	5.53584	4.61702	0.00157915	0.0397927	-0.801932	None
PMVK	-0.324045	8.65573	-4.61538	0.0015826	0.0397927	-0.804078	None
C12orf57	-0.314529	11.3546	-4.61479	0.00158384	0.0397927	-0.804848	None
PCDH9	0.340218	7.87872	4.61371	0.00158615	0.0397927	-0.806276	None
FXYD2 /// FXYD6 /// FXYD6-FXYD2	-0.371447	8.17091	-4.61336	0.00158687	0.0397927	-0.806725	None
CLVS1	0.736087	7.99448	4.60792	0.00159847	0.0400098	-0.813874	None
MRPL24	-0.316065	11.2794	-4.60743	0.00159951	0.0400098	-0.814516	None
CXorf40A	-0.555052	8.0412	-4.60554	0.00160355	0.0400368	-0.81699	None
TNFRSF10A	0.708194	9.3093	4.60506	0.00160458	0.0400368	-0.817622	None
PIGT	0.341339	9.54872	4.60292	0.00160918	0.0401017	-0.820431	None
ID4	0.682503	6.51795	4.59969	0.00161614	0.0401997	-0.824672	None
SPECC1	0.383603	7.79185	4.59709	0.00162178	0.0401997	-0.828092	None
PELO	0.397943	9.89075	4.59678	0.00162246	0.0401997	-0.828507	None
NRF1	-0.460894	6.99042	-4.59596	0.00162423	0.0401997	-0.829577	None
MRGPRE	0.404626	8.38383	4.59573	0.00162473	0.0401997	-0.829878	None
KRBOX4	-0.65855	6.507	-4.59555	0.00162512	0.0401997	-0.830113	None
EGLN3	-0.459447	5.07054	-4.59362	0.00162935	0.0402288	-0.832663	None
OSGEP	-0.351343	8.38135	-4.59297	0.00163075	0.0402288	-0.83351	None
SLC2A6	0.371121	7.98692	4.59226	0.00163231	0.0402288	-0.834446	None
PAPPA-AS1	0.608003	6.27584	4.59051	0.00163614	0.0402738	-0.836749	None
FAM13C	0.573675	3.98348	4.58874	0.00164002	0.0403181	-0.839077	None
SOCS6	0.355444	9.44961	4.58674	0.00164443	0.0403181	-0.841714	None
C1GALT1C1L	-0.366531	3.54751	-4.58611	0.00164582	0.0403181	-0.842544	None
DCUN1D1	0.313747	7.74735	4.58604	0.00164596	0.0403181	-0.842631	None
PTGER4	0.405095	7.46836	4.58192	0.00165508	0.0404606	-0.848059	None
KAT2B	-0.41558	3.67754	-4.58159	0.00165581	0.0404606	-0.848491	None
UBE2E1	0.298343	11.6345	4.57987	0.00165964	0.0404823	-0.850761	None
C7orf49	-0.317565	9.03751	-4.57938	0.00166073	0.0404823	-0.851406	None
TMEM163	0.417987	3.6973	4.57788	0.00166406	0.0404891	-0.853374	None
WBSCR27	0.333941	7.3874	4.57704	0.00166595	0.0404891	-0.854486	None
TRIM41	-0.339827	7.86296	-4.57654	0.00166706	0.0404891	-0.855141	None
AP3S2 /// C15orf38-AP3S2	-0.607862	6.85014	-4.57434	0.00167199	0.0405513	-0.858043	None
MICALL2	0.356365	7.85148	4.5736	0.00167365	0.0405513	-0.85902	None
PPFIBP1	0.376712	6.67212	4.56927	0.0016834	0.0406774	-0.864727	None
LMTK2	0.352645	6.05312	4.56713	0.00168826	0.0406774	-0.867557	None
MOSPD1	0.438249	7.26034	4.56693	0.00168869	0.0406774	-0.867811	None
FAM131C	0.322117	6.9973	4.56583	0.00169119	0.0406774	-0.869261	None
STK25	-0.29421	8.79898	-4.56462	0.00169396	0.0406774	-0.870868	None
ANXA2P1	0.552224	7.59708	4.56319	0.00169721	0.0406774	-0.872755	None
ZNF222	0.338693	6.71665	4.56275	0.0016982	0.0406774	-0.873326	None
ITGB8	0.600459	5.9185	4.56182	0.00170034	0.0406774	-0.874563	None
PIM1	0.358643	7.37131	4.56098	0.00170226	0.0406774	-0.875674	None
STAG3 /// STAG3L1 /// STAG3L3 /// STAG3L2	0.479768	7.98932	4.56027	0.00170388	0.0406774	-0.876608	None
GNG12	-0.405945	9.07656	-4.55914	0.00170648	0.0406774	-0.878104	None
IBTK	-0.820013	8.23475	-4.55894	0.00170694	0.0406774	-0.878368	None
PNPLA8	0.444897	8.44221	4.55827	0.00170846	0.0406774	-0.879246	None
ST3GAL3	0.38137	6.51025	4.55756	0.0017101	0.0406774	-0.880189	None
ZNF300	-0.330139	7.86844	-4.55652	0.00171248	0.0406774	-0.881554	None
2005-03-01	-0.388867	6.41662	-4.55637	0.00171282	0.0406774	-0.881752	None
CHST3	-0.312622	7.91489	-4.55496	0.00171609	0.0406774	-0.883627	None
SPANXA1 /// SPANXD /// SPANXC /// SPANXA2	0.667721	4.74294	4.55479	0.00171648	0.0406774	-0.883846	None
CTDSPL	-1.12119	6.88403	-4.55442	0.00171734	0.0406774	-0.884339	Down
AUTS2	-0.490746	7.35409	-4.55308	0.00172044	0.0407029	-0.886112	None
CYBA	0.310864	11.6638	4.55196	0.00172301	0.0407158	-0.887582	None
CNOT6	-0.815294	8.41055	-4.55085	0.00172559	0.0407289	-0.889052	None
NUP62CL	-1.13435	7.78637	-4.54993	0.00172774	0.0407317	-0.890274	Down
CPEB2	0.950741	7.75025	4.54394	0.00174172	0.040998	-0.898193	None
RAB40B	1.32493	8.45469	4.54334	0.00174312	0.040998	-0.898983	Up
XRCC6BP1	-0.314494	8.27203	-4.53871	0.00175403	0.0411269	-0.90512	None
DCPS	-0.354959	8.24714	-4.53869	0.00175408	0.0411269	-0.905147	None
ADCK2	-0.814612	6.9863	-4.53801	0.00175568	0.0411269	-0.906042	None
2002-03-01	0.467885	7.37193	4.53754	0.00175679	0.0411269	-0.906662	None
KIAA1804	-0.33908	7.4098	-4.53499	0.00176283	0.0411789	-0.910035	None
SIMC1	-0.303708	8.32454	-4.53317	0.00176717	0.0411789	-0.912452	None
DSCC1	-0.713856	7.86286	-4.53159	0.00177093	0.0411789	-0.914542	None
FAM69A	-0.456203	7.27334	-4.53085	0.00177271	0.0411789	-0.915529	None
UBE2V1 /// TMEM189-UBE2V1	0.345811	9.81772	4.53058	0.00177335	0.0411789	-0.915886	None
VWA8	-0.360702	6.31965	-4.53023	0.00177417	0.0411789	-0.916343	None
GH1	0.505472	5.11186	4.53013	0.00177441	0.0411789	-0.916475	None
C6orf48	0.449378	10.709	4.52972	0.00177541	0.0411789	-0.917029	None
IL11RA	-0.392967	6.55143	-4.52431	0.0017884	0.0414324	-0.924195	None
MRPS23	-0.299049	11.4292	-4.52192	0.00179418	0.0415183	-0.927366	None
ZDBF2	0.379142	6.13735	4.51557	0.00180964	0.0418011	-0.935802	None
FANCD2 /// FANCD2P2	-0.699216	7.40717	-4.51519	0.00181056	0.0418011	-0.936304	None
JMJD6	0.546825	4.86977	4.51161	0.00181933	0.0419381	-0.941054	None
WNT7B	-0.444432	9.3686	-4.51107	0.00182067	0.0419381	-0.941778	None
SLC31A1	0.34598	8.73045	4.50904	0.00182567	0.0420051	-0.944476	None
IFNGR1	0.749937	9.94772	4.5079	0.00182847	0.0420214	-0.945982	None
DOCK3	0.431734	4.55776	4.50571	0.00183389	0.0420412	-0.94889	None
ADGRE5	-0.336352	9.29407	-4.505	0.00183565	0.0420412	-0.949834	None
ERGIC2	-0.302767	9.74822	-4.50431	0.00183738	0.0420412	-0.95076	None
PRIMPOL	-0.303171	7.95783	-4.50418	0.00183771	0.0420412	-0.950937	None
JRKL	0.40315	5.9978	4.50291	0.00184086	0.0420655	-0.952624	None
DHRS4 /// DHRS4L2	-0.295939	10.149	-4.50093	0.00184579	0.04213	-0.95525	None
CD9	-0.319584	10.5436	-4.49867	0.00185145	0.0422114	-0.958265	None
TUBB4B	-0.352069	12.3339	-4.49621	0.0018576	0.0423037	-0.961528	None
PINX1	-0.369259	7.81792	-4.49412	0.00186288	0.0423757	-0.964315	None
TOMM7 /// C4orf46	-0.319066	12.3171	-4.49258	0.00186677	0.0424163	-0.96637	None
IL20RB	-0.479097	4.92506	-4.4901	0.00187303	0.0424974	-0.969663	None
ORAI1	0.363548	9.34277	4.4895	0.00187458	0.0424974	-0.970472	None
KLHL26	-0.395021	6.4007	-4.48839	0.00187739	0.0425017	-0.971947	None
UBE3C	-0.320283	9.07011	-4.48776	0.001879	0.0425017	-0.97279	None
PVR	-0.432645	8.81686	-4.48658	0.001882	0.0425218	-0.97436	None
CXCR4	0.635987	5.24231	4.48484	0.00188643	0.042574	-0.976675	None
UBXN4	-0.371591	7.6622	-4.48211	0.00189344	0.0426424	-0.980319	None
CD5L	0.340171	6.17837	4.48169	0.00189451	0.0426424	-0.980877	None
LTBP1	-0.369972	6.40871	-4.48117	0.00189583	0.0426424	-0.981564	None
MAP1LC3A	0.29724	6.87843	4.47867	0.00190228	0.0426784	-0.984906	None
ENOPH1	-0.574467	8.43871	-4.47813	0.00190367	0.0426784	-0.985623	None
TEX10	0.337141	9.46095	4.47808	0.00190381	0.0426784	-0.985694	None
SMAP1	0.367343	8.07443	4.47687	0.00190693	0.042691	-0.987304	None
GYG2	-0.493293	6.42214	-4.47622	0.00190862	0.042691	-0.988177	None
EED	-0.323783	9.59332	-4.47404	0.00191426	0.0427525	-0.991079	None
SLC25A16	-0.385847	7.02959	-4.47351	0.00191562	0.0427525	-0.99178	None
RLF	0.306423	6.78968	4.47183	0.00191999	0.0427656	-0.994023	None
DCLRE1A	-0.395173	8.1137	-4.47108	0.00192197	0.0427656	-0.995033	None
KIF4A /// KIF4B	-0.690476	8.49404	-4.47084	0.0019226	0.0427656	-0.995356	None
ZNF280C	0.372583	7.54521	4.4679	0.00193028	0.0428672	-0.999281	None
COMMD4	-0.345146	10.3138	-4.46673	0.00193334	0.0428672	-1.00084	None
NRSN2	-0.315641	6.91301	-4.46664	0.00193357	0.0428672	-1.00095	None
PPM1F	-0.570563	5.32491	-4.46495	0.00193802	0.0429186	-1.00322	None
CDAN1	-0.465441	6.14043	-4.45985	0.00195149	0.0431691	-1.01003	None
DBF4	-0.533909	8.20601	-4.45305	0.00196962	0.0434158	-1.01913	None
SH3BGRL	0.319224	9.94371	4.45292	0.00196996	0.0434158	-1.0193	None
ADAM10	-1.18072	7.75074	-4.45242	0.0019713	0.0434158	-1.01997	Down
PRDM1	0.55059	6.3293	4.45186	0.00197281	0.0434158	-1.02072	None
EMD	-0.496282	8.98861	-4.45047	0.00197654	0.0434158	-1.02258	None
TPBG	-0.528696	8.86502	-4.4499	0.00197806	0.0434158	-1.02334	None
GPLD1	0.355728	4.06552	4.44921	0.00197992	0.0434158	-1.02426	None
COL4A1	1.26478	9.97615	4.44921	0.00197993	0.0434158	-1.02427	Up
TRIM34	-0.429984	4.26708	-4.4454	0.00199022	0.0435939	-1.02937	None
SCOC	-1.02473	7.70389	-4.44344	0.00199554	0.043641	-1.032	Down
ZNF513	0.348634	8.54685	4.44279	0.00199729	0.043641	-1.03286	None
INSL4	-0.925423	9.56439	-4.4422	0.00199889	0.043641	-1.03365	None
RAD51C	-0.337942	9.08433	-4.43983	0.00200537	0.0437235	-1.03683	None
DKK1	0.6393	12.5861	4.43885	0.00200804	0.0437235	-1.03814	None
BLOC1S6	-1.73198	7.45445	-4.43791	0.00201062	0.0437235	-1.03941	Down
PRELID2	-0.863909	6.09474	-4.43708	0.00201288	0.0437235	-1.04051	None
C6orf141	1.06471	6.46565	4.43641	0.00201472	0.0437235	-1.04141	Up
ZNF24	0.353773	7.38545	4.43604	0.00201573	0.0437235	-1.04191	None
FAM120A	-0.289083	11.7365	-4.43311	0.0020238	0.0438133	-1.04584	None
DISP2	0.412641	5.32113	4.43295	0.00202423	0.0438133	-1.04605	None
MFSD3	0.330879	8.92855	4.42742	0.00203955	0.0439883	-1.05347	None
UBAC2	-0.325623	8.63561	-4.42656	0.00204196	0.0439883	-1.05463	None
GPR108	0.281531	8.83416	4.42624	0.00204285	0.0439883	-1.05506	None
KIAA0753	-0.402038	6.38294	-4.42549	0.00204491	0.0439883	-1.05605	None
RALGDS	0.58778	8.36341	4.42476	0.00204696	0.0439883	-1.05704	None
EEF1A1	0.955796	8.66306	4.42475	0.002047	0.0439883	-1.05706	None
HOXB7	-0.35809	8.92429	-4.42451	0.00204765	0.0439883	-1.05737	None
SLC16A3	-0.429959	7.74961	-4.42297	0.00205198	0.0440137	-1.05945	None
POLB	-1.1541	7.7313	-4.4225	0.00205329	0.0440137	-1.06008	Down
CXXC5	0.440483	8.6209	4.42174	0.00205541	0.0440137	-1.06109	None
CCDC64	0.309429	6.47498	4.41953	0.00206161	0.0440996	-1.06406	None
SRF	-0.34154	7.2025	-4.41821	0.00206534	0.0441324	-1.06584	None
TMEM68	0.742025	8.83224	4.41704	0.00206865	0.0441561	-1.06742	None
GRIP1	0.875603	6.42841	4.41505	0.00207425	0.0442287	-1.07008	None
GBAS	-0.345022	9.7356	-4.41301	0.00208004	0.0443051	-1.07282	None
TTC19	0.307026	9.76451	4.40988	0.00208896	0.044448	-1.07704	None
SLC19A1	-0.45192	6.14442	-4.40777	0.00209499	0.0445291	-1.07987	None
SPNS3	0.305975	5.91317	4.40559	0.00210125	0.044615	-1.08281	None
SMARCA5	-0.428912	9.21434	-4.40399	0.00210583	0.0446649	-1.08495	None
HAS3	-0.338426	8.33131	-4.39829	0.00212232	0.0449488	-1.09263	None
RNF187	-1.42339	8.4382	-4.39782	0.00212369	0.0449488	-1.09327	Down
CDC6	-0.595532	9.77504	-4.39638	0.00212788	0.0449901	-1.09521	None
CBX4	-0.368172	8.41794	-4.39525	0.00213115	0.0450118	-1.09672	None
ANKRD54	-0.865199	7.4781	-4.39264	0.00213878	0.0451116	-1.10024	None
C6orf106	-0.318976	7.34261	-4.3921	0.00214036	0.0451116	-1.10097	None
PKP4	-0.422071	6.99891	-4.38882	0.00214999	0.0452669	-1.10539	None
CREB5	0.660282	3.57028	4.38689	0.00215568	0.0452773	-1.10799	None
AHRR	0.851166	6.06458	4.38656	0.00215667	0.0452773	-1.10845	None
TYSND1	0.476827	7.19212	4.38636	0.00215724	0.0452773	-1.10871	None
OSGEPL1	-0.334636	7.23291	-4.38286	0.00216763	0.045443	-1.11344	None
NTPCR	0.338999	10.1305	4.38136	0.00217209	0.045443	-1.11546	None
MKNK1	-0.620462	6.66704	-4.38017	0.00217561	0.045443	-1.11705	None
ZNF514	-0.353417	5.90562	-4.37998	0.00217618	0.045443	-1.11731	None
TAS2R19	-0.308333	2.97448	-4.37989	0.00217645	0.045443	-1.11744	None
BAIAP2L1	-0.303005	8.00723	-4.37667	0.00218609	0.0454981	-1.12179	None
JMJD7-PLA2G4B /// JMJD7 /// PLA2G4B	-0.320702	6.13514	-4.37451	0.00219257	0.0454981	-1.1247	None
CITED2	0.93024	8.11124	4.37341	0.00219586	0.0454981	-1.12618	None
TMEM19	0.331152	8.38991	4.37277	0.00219782	0.0454981	-1.12706	None
CCAR2	-0.294818	9.27064	-4.37166	0.00220115	0.0454981	-1.12855	None
MED12	-0.299467	6.55827	-4.3716	0.00220133	0.0454981	-1.12863	None
H2AFV	-0.703051	6.74267	-4.37047	0.00220475	0.0454981	-1.13016	None
GPRC5B	0.72618	7.31237	4.37018	0.00220562	0.0454981	-1.13055	None
ACADM	-0.369167	8.19968	-4.36978	0.00220683	0.0454981	-1.13109	None
MDP1 /// NEDD8-MDP1	-0.357983	9.16392	-4.36961	0.00220734	0.0454981	-1.13132	None
ZDHHC12	-0.821097	8.14598	-4.36954	0.00220756	0.0454981	-1.13141	None
GXYLT1	0.332397	7.04198	4.36931	0.00220826	0.0454981	-1.13173	None
KIFC1	-0.529755	8.32313	-4.36922	0.00220854	0.0454981	-1.13185	None
PFDN4	-0.502948	4.2469	-4.3672	0.00221465	0.0455408	-1.13457	None
MAP3K1	0.651825	8.50081	4.36704	0.00221514	0.0455408	-1.13479	None
MLPH	-0.286309	10.9331	-4.36595	0.00221847	0.0455627	-1.13627	None
PHF8	-0.966168	5.65035	-4.36431	0.00222345	0.0455776	-1.13848	None
CSNK1G1	0.851278	7.95645	4.36422	0.00222374	0.0455776	-1.13861	None
BOLA3	-0.376068	11.0666	-4.36213	0.00223011	0.0456616	-1.14143	None
ASH2L	-0.51554	8.16044	-4.35836	0.00224172	0.0457663	-1.14654	None
IFT20	-0.424196	8.95657	-4.35743	0.00224458	0.0457663	-1.1478	None
CKLF /// CMTM1	-0.851801	5.77091	-4.35641	0.00224772	0.0457663	-1.14917	None
MARS	-0.65597	9.94668	-4.35465	0.00225314	0.0457663	-1.15155	None
M6PR	0.329455	10.4389	4.35377	0.0022559	0.0457663	-1.15275	None
KIAA1551	0.714541	8.41957	4.35346	0.00225686	0.0457663	-1.15317	None
MRPS10	-0.314596	9.30616	-4.35329	0.00225736	0.0457663	-1.15339	None
ANPEP	0.422136	7.39595	4.35322	0.00225759	0.0457663	-1.15349	None
PLPPR3	0.352734	6.61612	4.353	0.00225828	0.0457663	-1.15379	None
APOBEC3C	0.433382	9.65203	4.3529	0.00225857	0.0457663	-1.15392	None
FIGLA	0.331297	4.16574	4.35235	0.00226029	0.0457663	-1.15467	None
ONECUT2	0.410875	5.91298	4.351	0.0022645	0.0458054	-1.1565	None
CD151	-0.283784	10.6219	-4.34837	0.00227269	0.0459248	-1.16006	None
TRIM28	-0.316386	10.7564	-4.3446	0.00228451	0.0460836	-1.16517	None
SDF2	0.290375	9.61016	4.3444	0.00228514	0.0460836	-1.16544	None
FAM60A	0.305848	9.1119	4.34162	0.00229388	0.0461716	-1.1692	None
FAM84B	-1.09893	7.09641	-4.34155	0.0022941	0.0461716	-1.1693	Down
FAN1	-0.755575	6.97357	-4.33964	0.00230015	0.046247	-1.17189	None
SLC30A1	0.685526	8.87182	4.33643	0.00231035	0.0463732	-1.17625	None
RFC3	-0.595336	8.94008	-4.33528	0.002314	0.0463732	-1.17781	None
CIDEB	0.303412	5.68392	4.33429	0.00231714	0.0463732	-1.17914	None
OTUB1	-0.418587	9.65287	-4.33407	0.00231787	0.0463732	-1.17945	None
THAP5 /// THAP5P1	-0.60965	4.67708	-4.33345	0.00231982	0.0463732	-1.18028	None
GINS3	-0.578877	8.47029	-4.33331	0.00232027	0.0463732	-1.18048	None
KANSL1	0.291813	8.98335	4.32661	0.0023418	0.0467228	-1.18958	None
POLH	0.329477	6.23691	4.32615	0.0023433	0.0467228	-1.19021	None
RBMXL1	-0.779553	6.1287	-4.3257	0.00234475	0.0467228	-1.19082	None
KDELC1	-0.676227	7.13611	-4.32474	0.00234785	0.0467383	-1.19212	None
SAAL1	-0.309827	9.28746	-4.32188	0.00235711	0.0468761	-1.196	None
CASP6 /// PLA2G12A	-0.278435	6.71652	-4.31963	0.00236445	0.0469756	-1.19906	None
FLVCR2	0.448776	6.69865	4.31726	0.00237217	0.0470785	-1.20228	None
TRAPPC6A	0.586196	9.0364	4.31661	0.00237432	0.0470785	-1.20317	None
CLDN3	0.596342	6.40672	4.31491	0.00237987	0.0470994	-1.20547	None
F2RL2	0.904819	5.8399	4.31486	0.00238006	0.0470994	-1.20555	None
PYCRL	-0.45936	8.26005	-4.31399	0.0023829	0.0471092	-1.20672	None
GAL	0.517008	7.16261	4.31309	0.00238586	0.0471214	-1.20795	None
ABCA3	0.368448	6.25336	4.30965	0.00239722	0.0472992	-1.21263	None
C9orf40	-1.62596	6.53967	-4.3087	0.00240037	0.0473148	-1.21392	Down
DMAP1	-0.302609	8.27231	-4.30715	0.00240554	0.0473319	-1.21604	None
TGOLN2	-0.481	7.37516	-4.30625	0.00240853	0.0473319	-1.21727	None
TOP1	0.340176	10.4782	4.30542	0.00241127	0.0473319	-1.21839	None
PALD1	-0.945825	6.45207	-4.30502	0.0024126	0.0473319	-1.21893	None
KITLG	0.912364	10.1151	4.30475	0.00241349	0.0473319	-1.2193	None
OR5T2 /// OR5T3 /// OR5T1	0.481769	4.55808	4.30373	0.00241691	0.0473319	-1.22069	None
ZNHIT6	-0.322772	8.17154	-4.3018	0.00242335	0.0473319	-1.22332	None
SDCCAG3	-0.311504	9.71298	-4.29968	0.00243047	0.0473319	-1.2262	None
DNER	0.784248	6.62838	4.29944	0.00243129	0.0473319	-1.22654	None
MLLT11	-0.485004	8.41704	-4.29914	0.00243228	0.0473319	-1.22694	None
SAR1A	0.352826	10.3016	4.29805	0.00243597	0.0473319	-1.22843	None
PQBP1	-0.816463	9.41401	-4.29782	0.00243673	0.0473319	-1.22874	None
OSER1	-0.317651	8.71357	-4.29772	0.00243708	0.0473319	-1.22888	None
TWSG1	-0.356672	7.65576	-4.29768	0.0024372	0.0473319	-1.22893	None
POLR3E /// LOC101060521	-0.350707	8.19758	-4.29755	0.00243765	0.0473319	-1.22911	None
NUP188	-0.541251	9.10044	-4.29717	0.00243894	0.0473319	-1.22963	None
GPRIN2	-0.314981	7.86776	-4.29368	0.00245071	0.0475144	-1.23438	None
CWF19L1	-0.322656	8.28971	-4.2923	0.00245541	0.0475597	-1.23627	None
HEATR6	-0.345425	7.82411	-4.29087	0.00246027	0.0475967	-1.23822	None
POGK	-0.33048	9.69016	-4.29034	0.00246206	0.0475967	-1.23894	None
IFIH1	1.06362	4.4465	4.28913	0.0024662	0.0476308	-1.24059	Up
GABBR1 /// UBD	0.55287	5.13488	4.28748	0.00247184	0.0476889	-1.24285	None
CYFIP2	0.346859	8.5226	4.28668	0.00247458	0.0476889	-1.24393	None
CD2BP2	-0.326034	8.87266	-4.28573	0.00247783	0.0476889	-1.24523	None
BTN3A3	0.400056	4.85703	4.28547	0.0024787	0.0476889	-1.24558	None
FAM72C /// FAM72B /// FAM72D /// FAM72A	-0.50262	9.07232	-4.28475	0.0024812	0.0476913	-1.24657	None
SLC25A40	-0.580356	7.52944	-4.28339	0.00248585	0.0477351	-1.24842	None
MBOAT2	-0.27944	8.49488	-4.28107	0.00249386	0.047843	-1.25159	None
UHRF1	-1.13093	9.34324	-4.27616	0.00251088	0.0480806	-1.25829	Down
COL9A1	0.306999	3.55038	4.27612	0.00251103	0.0480806	-1.25835	None
ADAL	0.355084	6.16863	4.27359	0.00251985	0.0482035	-1.26181	None
KLRC1	0.43319	3.15927	4.27249	0.0025237	0.0482313	-1.26332	None
TMEM63A	0.27487	6.5755	4.27113	0.00252846	0.0482762	-1.26517	None
SETBP1	-0.403387	6.01408	-4.26885	0.00253645	0.0483399	-1.26828	None
CXorf56	-0.366586	7.31025	-4.26881	0.0025366	0.0483399	-1.26834	None
FRMD6	-0.367846	7.62369	-4.26811	0.00253905	0.0483405	-1.26929	None
SNORA71A	-0.391389	4.92281	-4.2671	0.00254262	0.0483622	-1.27068	None
GALNS	0.324734	9.46577	4.26643	0.002545	0.0483622	-1.2716	None
CHST11	0.353403	7.89076	4.26292	0.00255741	0.0484445	-1.2764	None
KDELR3	0.890821	8.61128	4.26283	0.00255773	0.0484445	-1.27652	None
SPNS1	0.338925	9.09351	4.26244	0.00255911	0.0484445	-1.27705	None
CLTA	-0.279727	11.5257	-4.26198	0.00256073	0.0484445	-1.27768	None
PBXIP1	0.416147	7.53152	4.26138	0.00256288	0.0484445	-1.27851	None
SERPINF1	0.699231	4.86729	4.26065	0.00256547	0.0484445	-1.2795	None
PPIL1	-0.333642	9.2169	-4.26044	0.00256622	0.0484445	-1.27979	None
USP31	0.478372	7.03499	4.25904	0.0025712	0.0484931	-1.2817	None
ATG3	-0.311913	10.1862	-4.25652	0.00258022	0.0486155	-1.28516	None
PAPLN	1.10985	6.40578	4.25588	0.00258253	0.0486155	-1.28604	Up
TSPYL2	0.392078	6.33199	4.25386	0.00258978	0.0486853	-1.2888	None
WASF2	-0.360078	7.05477	-4.25335	0.0025916	0.0486853	-1.28949	None
DPYSL3	-0.389204	6.80954	-4.25282	0.00259351	0.0486853	-1.29022	None
CHRAC1	-0.324669	10.4982	-4.25163	0.0025978	0.0487202	-1.29185	None
DGCR6 /// DGCR6L /// LOC102724770	-0.281209	8.61213	-4.24868	0.00260849	0.0488619	-1.2959	None
PPP1R12C	-0.348363	7.50812	-4.2481	0.00261058	0.0488619	-1.29669	None
LTV1	0.308146	9.08657	4.2474	0.00261313	0.0488619	-1.29765	None
ARFGEF2	0.436728	9.83103	4.24686	0.00261508	0.0488619	-1.29839	None
IFI27L2	0.278541	8.13294	4.24436	0.0026242	0.0489054	-1.30182	None
MRS2	-0.840452	7.29881	-4.24381	0.0026262	0.0489054	-1.30257	None
NSUN5	-0.341152	8.51059	-4.24369	0.00262663	0.0489054	-1.30274	None
NUAK2	0.32634	7.89972	4.24355	0.00262715	0.0489054	-1.30293	None
TUBB2A	0.274758	10.3782	4.24276	0.00263003	0.0489137	-1.30401	None
RARRES3	0.556168	5.70533	4.24055	0.00263812	0.0490188	-1.30704	None
ARFGAP3	0.379146	9.16803	4.23837	0.00264614	0.0491223	-1.31003	None
SOCS4	0.339096	9.38216	4.23747	0.00264947	0.0491387	-1.31127	None
AMPD3	0.806502	5.93992	4.23326	0.00266504	0.0493608	-1.31705	None
HTATSF1	-0.391609	8.35005	-4.2329	0.00266636	0.0493608	-1.31754	None
SH3PXD2B	-0.586557	6.95619	-4.23077	0.00267428	0.0494343	-1.32047	None
RGCC	1.08232	5.69319	4.23051	0.00267525	0.0494343	-1.32083	Up
TLN1	-0.764726	7.04957	-4.22969	0.0026783	0.0494451	-1.32195	None
SSNA1	-0.401891	9.72587	-4.2277	0.00268575	0.0494918	-1.32469	None
PLEKHM1	0.536761	8.74527	4.22769	0.00268575	0.0494918	-1.32469	None
CBLN3	0.382889	6.41939	4.22697	0.00268848	0.0494965	-1.32569	None
TMEM150B	0.299332	7.80718	4.22472	0.00269689	0.049606	-1.32877	None
C11orf86	-0.822449	7.55884	-4.22249	0.0027053	0.0497151	-1.33184	None
BRWD3	0.347474	5.77342	4.22055	0.00271262	0.0497724	-1.33451	None
ARNT2	-0.319752	8.10574	-4.22035	0.00271337	0.0497724	-1.33478	None
MAPKAPK3	-0.322282	7.4997	-4.21869	0.00271966	0.0498354	-1.33706	None
CEBPG	-0.77381	9.67875	-4.21814	0.00272177	0.0498354	-1.33783	None
SLC6A15	-0.514894	5.30794	-4.21474	0.00273469	0.0500264	-1.3425	None
MB21D2	0.591658	6.623	4.21149	0.00274711	0.0502078	-1.34697	None
DOPEY2	0.543679	5.61946	4.20927	0.00275563	0.0503178	-1.35003	None
RAB10	0.443565	11.0664	4.20538	0.00277063	0.0505457	-1.35538	None
DYNC1LI2	-0.293908	9.3086	-4.20241	0.00278214	0.0507098	-1.35948	None
SCAP	-0.29585	8.73198	-4.19895	0.00279561	0.0508699	-1.36424	None
RAB18	-0.40893	7.21926	-4.19811	0.00279892	0.0508699	-1.36541	None
GJA1	-0.351535	6.33373	-4.19771	0.00280048	0.0508699	-1.36596	None
GOLT1B	0.341718	10.4906	4.19756	0.00280106	0.0508699	-1.36616	None
ABR	-0.306237	5.79503	-4.19616	0.00280653	0.0509232	-1.36809	None
ZNF25	-0.455346	4.71574	-4.19279	0.0028198	0.0511063	-1.37274	None
ACSL4	0.342157	9.14014	4.19149	0.00282492	0.0511063	-1.37453	None
UBE2D2	0.429487	6.26585	4.19148	0.00282495	0.0511063	-1.37454	None
COPA	0.388525	7.08182	4.19102	0.0028268	0.0511063	-1.37519	None
SH3BP1 /// PDXP	-0.473132	8.1182	-4.18828	0.00283761	0.0512557	-1.37895	None
HRH1	0.453722	6.72597	4.18376	0.00285563	0.051384	-1.3852	None
SEMA3B	0.392949	6.81369	4.1836	0.00285627	0.051384	-1.38542	None
GPS1	-1.63058	8.69859	-4.18357	0.00285637	0.051384	-1.38546	Down
KDM5D	0.315858	7.63819	4.18307	0.0028584	0.051384	-1.38616	None
SPCS2 /// SPCS2P4	-0.334039	10.1296	-4.18117	0.00286599	0.051384	-1.38877	None
SYNC	0.527883	6.02984	4.18105	0.00286649	0.051384	-1.38894	None
PLEKHA1	0.652126	8.9447	4.18081	0.00286745	0.051384	-1.38927	None
FXYD5	-0.340536	9.80422	-4.18052	0.0028686	0.051384	-1.38967	None
SOX18	0.437093	6.3732	4.18043	0.00286895	0.051384	-1.38979	None
PTGDS	0.446733	5.37472	4.1801	0.0028703	0.051384	-1.39026	None
LYAR	-0.305973	8.66128	-4.17625	0.00288582	0.0516159	-1.39558	None
TPM2	2.09491	7.40136	4.17535	0.00288943	0.0516288	-1.39681	Up
ACTR8	-0.303561	5.99692	-4.17433	0.00289357	0.0516288	-1.39822	None
MFSD14B	0.343577	10.1639	4.1735	0.00289693	0.0516288	-1.39937	None
C1QTNF3	0.303959	4.06618	4.1735	0.00289694	0.0516288	-1.39937	None
NXPE3	0.504247	7.15965	4.17215	0.00290243	0.0516288	-1.40124	None
CEP78	-0.346029	8.31661	-4.17125	0.0029061	0.0516288	-1.40249	None
IRAK4	-0.318748	6.01375	-4.17122	0.00290619	0.0516288	-1.40252	None
IRF2	0.312022	7.37717	4.171	0.00290711	0.0516288	-1.40283	None
ENOX1	0.584011	5.92418	4.16905	0.00291507	0.0517244	-1.40553	None
MRPS11	-0.302752	9.52106	-4.16718	0.00292272	0.0518145	-1.40812	None
ANKRD50	-0.378101	7.6219	-4.16502	0.00293158	0.0518325	-1.4111	None
KNSTRN	-0.287966	9.36833	-4.16478	0.00293256	0.0518325	-1.41143	None
GALNT18	0.9252	7.90915	4.16443	0.00293401	0.0518325	-1.41192	None
IFNLR1	-0.457095	6.26254	-4.16441	0.00293406	0.0518325	-1.41194	None
PQLC2L	0.286585	5.08308	4.15959	0.00295396	0.0520148	-1.41861	None
MOB2	-0.666194	7.73549	-4.15849	0.00295854	0.0520148	-1.42014	None
NAIF1	-0.358004	7.01787	-4.15809	0.00296019	0.0520148	-1.42069	None
MNX1	-0.275599	8.32236	-4.15787	0.00296111	0.0520148	-1.42099	None
SDC1	-0.368575	9.34718	-4.1578	0.0029614	0.0520148	-1.42109	None
COPRS	-0.302649	10.635	-4.1574	0.00296305	0.0520148	-1.42164	None
PSMD11	-0.303953	11.0733	-4.15704	0.00296455	0.0520148	-1.42214	None
PIGR	0.443021	3.90627	4.15635	0.00296742	0.0520148	-1.4231	None
FLNB	-0.401278	10.8853	-4.1557	0.00297015	0.0520148	-1.424	None
SMYD3	-0.698883	7.82019	-4.15567	0.00297028	0.0520148	-1.42404	None
FBXO9	-0.344524	9.0855	-4.15374	0.00297831	0.0521101	-1.42671	None
GPN3	-0.299129	8.60867	-4.15212	0.0029851	0.0521834	-1.42896	None
NSF	-0.282834	10.0462	-4.15049	0.00299196	0.0522192	-1.43122	None
GPAT3	0.772819	9.2681	4.15039	0.00299235	0.0522192	-1.43135	None
USF1	-0.648969	6.83141	-4.14815	0.00300178	0.0523291	-1.43446	None
IFNA1 /// IFNA13	0.367728	3.80936	4.14766	0.00300386	0.0523291	-1.43514	None
KIRREL3	-0.360532	5.40121	-4.14699	0.00300668	0.0523329	-1.43607	None
TRPM6	-0.610426	6.71139	-4.14402	0.00301927	0.0524865	-1.44019	None
PARP2	-0.314349	8.92635	-4.14329	0.00302233	0.0524865	-1.44119	None
SLC1A1	0.33709	5.6713	4.14273	0.00302473	0.0524865	-1.44198	None
DPY19L2 /// DPY19L2P2 /// DPY19L2P1	0.30398	5.76957	4.14244	0.00302596	0.0524865	-1.44238	None
ZP4	0.273257	5.23315	4.14082	0.00303286	0.0525	-1.44463	None
EMP1	-0.415308	5.70695	-4.14073	0.00303326	0.0525	-1.44475	None
ZNF646	-0.315414	7.3285	-4.14042	0.00303457	0.0525	-1.44518	None
ERICH1	0.271459	9.27782	4.13971	0.00303761	0.0525073	-1.44617	None
SPATS2L	-0.497661	9.89394	-4.13888	0.00304114	0.0525231	-1.44732	None
CPQ	0.406209	5.87103	4.13826	0.00304378	0.0525235	-1.44817	None
MAN1B1	0.283671	9.18889	4.13743	0.00304733	0.0525396	-1.44932	None
NBPF14 /// NBPF11 /// NBPF8 /// NBPF10 /// NBPF20 /// LOC100996763 /// NBPF19 /// NBPF26 /// NBPF25P	-0.347431	8.13709	-4.13493	0.0030581	0.0526722	-1.4528	None
BRIP1	-0.606776	4.82238	-4.13442	0.00306026	0.0526722	-1.4535	None
P3H3	-0.362164	6.66263	-4.13272	0.00306759	0.0527531	-1.45586	None
LSM14A	-0.284448	10.521	-4.12933	0.00308225	0.0529191	-1.46057	None
NIPAL1	0.423599	3.9696	4.12927	0.00308251	0.0529191	-1.46065	None
C15orf57	0.315126	7.22802	4.12827	0.00308686	0.0529485	-1.46205	None
CDK16	-0.328325	9.41195	-4.12687	0.00309293	0.0529742	-1.46399	None
UBXN8	0.454668	8.05982	4.12671	0.00309363	0.0529742	-1.46421	None
PCDHB2	-0.35484	6.32179	-4.1255	0.00309894	0.0530198	-1.4659	None
NBPF1 /// NBPF10 /// NBPF19 /// LOC102724250	-0.818418	5.37735	-4.12454	0.0031031	0.0530458	-1.46722	None
RAPGEF1	-1.31085	7.03453	-4.1238	0.00310634	0.053056	-1.46825	Down
DST	-0.318767	6.2865	-4.12073	0.00311981	0.0532	-1.47253	None
MALAT1	0.27042	9.71142	4.12067	0.00312006	0.0532	-1.47261	None
FOXRED1	-0.881857	8.04143	-4.11953	0.0031251	0.0532406	-1.4742	None
KRTAP3-1	0.284815	7.83839	4.11788	0.00313237	0.0533171	-1.47649	None
ZNF362	-0.287862	5.69179	-4.11707	0.00313591	0.0533171	-1.47761	None
SLC17A5	1.02027	6.4096	4.11662	0.00313791	0.0533171	-1.47824	Up
MPC1	-0.785778	5.93002	-4.1161	0.00314021	0.0533171	-1.47896	None
TUBB3	-0.340774	11.2259	-4.11471	0.00314639	0.0533767	-1.4809	None
TMX2	0.261452	10.8132	4.11368	0.00315096	0.0533767	-1.48233	None
PRICKLE4 /// TOMM6	-1.0501	10.8759	-4.11351	0.00315169	0.0533767	-1.48256	Down
STX11	0.274148	5.95705	4.11239	0.00315669	0.0534163	-1.48413	None
ARHGEF26	-0.377578	6.34205	-4.10966	0.00316883	0.0535768	-1.48792	None
FOXF2	-0.797293	8.19112	-4.10831	0.0031749	0.0535832	-1.48981	None
TGFBR2	0.856455	11.8524	4.10751	0.00317848	0.0535832	-1.49092	None
ZNRF3	-0.750108	7.05603	-4.10708	0.00318041	0.0535832	-1.49152	None
CDC42	-1.29528	8.57097	-4.10647	0.00318312	0.0535832	-1.49236	Down
CHERP	0.292148	6.70322	4.10483	0.00319052	0.0535832	-1.49465	None
EN2	0.298192	5.62288	4.10482	0.00319057	0.0535832	-1.49467	None
CEL	0.360325	4.20307	4.10452	0.00319191	0.0535832	-1.49508	None
SIRT7	-0.35019	8.12115	-4.10404	0.00319406	0.0535832	-1.49575	None
KPTN	0.281146	8.69717	4.10393	0.00319458	0.0535832	-1.49591	None
EIF2AK4	-0.300278	7.89564	-4.10268	0.0032002	0.0535832	-1.49764	None
CEBPB	0.285141	10.8387	4.10187	0.00320385	0.0535832	-1.49877	None
RPS6KB2	-0.271268	8.80869	-4.10106	0.00320751	0.0535832	-1.4999	None
RPL38	0.322235	12.0095	4.10088	0.00320836	0.0535832	-1.50016	None
SPR	-0.283156	10.1279	-4.10086	0.00320845	0.0535832	-1.50019	None
SET /// SETSIP	-0.522112	10.9462	-4.10068	0.00320923	0.0535832	-1.50043	None
WDHD1	-0.590869	5.33492	-4.09935	0.00321529	0.0536399	-1.50229	None
RB1	0.33498	7.73421	4.09836	0.00321975	0.0536697	-1.50366	None
ZNF542P	0.289465	4.29947	4.09719	0.00322508	0.0537139	-1.50529	None
PSMD14	-0.294639	10.8862	-4.09624	0.00322943	0.0537202	-1.50662	None
OSTM1	0.361885	7.18175	4.09594	0.00323081	0.0537202	-1.50704	None
TRIAP1	0.47557	11.057	4.09492	0.00323543	0.053751	-1.50845	None
GAS8	-0.405471	6.23996	-4.09436	0.00323801	0.053751	-1.50924	None
ARID4A	0.830174	6.70476	4.09015	0.00325732	0.053913	-1.51511	None
SUN1	-0.450527	9.38479	-4.08959	0.00325991	0.053913	-1.5159	None
CBR4	-0.328562	8.22041	-4.08937	0.00326092	0.053913	-1.5162	None
TMEM8B	0.273172	6.72955	4.08936	0.00326095	0.053913	-1.51621	None
SLC41A1	-0.894114	7.22306	-4.0892	0.00326169	0.053913	-1.51643	None
SH3TC2	0.30162	5.31047	4.08834	0.00326568	0.053913	-1.51764	None
BCDIN3D	0.333314	7.36077	4.08814	0.00326656	0.053913	-1.51791	None
PATL2	0.472776	4.08023	4.0866	0.00327368	0.053929	-1.52006	None
LARP4B	-0.500231	7.52716	-4.086	0.00327649	0.053929	-1.52091	None
NCCRP1	0.299286	6.14464	4.08587	0.00327709	0.053929	-1.52109	None
FILIP1	-0.384823	6.97761	-4.08561	0.00327827	0.053929	-1.52144	None
OLR1	0.85932	4.85423	4.08412	0.00328519	0.0539987	-1.52353	None
PPP1CC	-0.28961	10.4287	-4.08194	0.00329535	0.0540786	-1.52657	None
FOXRED2	-0.316704	8.38784	-4.08152	0.00329729	0.0540786	-1.52715	None
USMG5	0.358368	5.6764	4.08134	0.00329813	0.0540786	-1.52741	None
SLC29A3	0.267138	8.02231	4.07985	0.00330511	0.0541488	-1.52949	None
PRICKLE1	0.373035	6.63638	4.07884	0.00330982	0.0541818	-1.5309	None
TRIM37	-0.301437	7.99122	-4.0777	0.00331516	0.0542251	-1.53249	None
C5orf34	-0.467612	8.22961	-4.07681	0.00331936	0.0542494	-1.53374	None
TSC22D3	-0.301048	7.32284	-4.07277	0.00333837	0.0545158	-1.53938	None
CYSRT1	0.351717	7.0052	4.07178	0.00334303	0.0545373	-1.54076	None
RP2	0.605069	9.47658	4.07118	0.00334586	0.0545373	-1.5416	None
ADM	0.750405	10.3062	4.07077	0.00334783	0.0545373	-1.54218	None
PPIB	-0.271743	12.1782	-4.06906	0.00335593	0.0545905	-1.54456	None
THOC3 /// LOC728554	-0.459229	10.3859	-4.06894	0.00335653	0.0545905	-1.54474	None
SMPX	0.380788	3.85598	4.06718	0.00336489	0.0546626	-1.5472	None
TAF1	0.306793	8.39964	4.06686	0.0033664	0.0546626	-1.54764	None
AS3MT /// BORCS7-ASMT	-0.419224	5.88837	-4.06555	0.00337265	0.0547197	-1.54947	None
SH3KBP1	-0.427598	9.23728	-4.06471	0.00337665	0.0547405	-1.55064	None
CKAP2L	-0.454801	6.82304	-4.06385	0.00338078	0.0547633	-1.55185	None
HSPB8	0.862173	7.40732	4.06214	0.00338898	0.0548518	-1.55424	None
CHD2	0.595402	7.79537	4.05931	0.00340262	0.054948	-1.55821	None
PIGL	-0.373355	7.06092	-4.05925	0.0034029	0.054948	-1.55829	None
GPS2	-0.334815	9.57981	-4.0592	0.00340313	0.054948	-1.55835	None
TMEM222	-0.313384	9.02129	-4.05721	0.00341275	0.055059	-1.56114	None
ACTA2	1.81165	9.14762	4.05644	0.0034165	0.0550754	-1.56223	Up
EXO1	-0.800624	8.1536	-4.0505	0.00344541	0.0554341	-1.57055	None
P3H2	0.34023	9.03457	4.05039	0.00344592	0.0554341	-1.5707	None
MSRB1	0.269942	10.1108	4.05016	0.00344704	0.0554341	-1.57102	None
HELZ	-0.802025	5.49023	-4.04821	0.00345658	0.0554452	-1.57374	None
CDC7	-0.290061	6.73005	-4.04799	0.00345769	0.0554452	-1.57406	None
ZSWIM3	0.378587	5.38574	4.04777	0.00345875	0.0554452	-1.57436	None
GAL3ST1	-0.440363	7.51055	-4.04777	0.00345877	0.0554452	-1.57437	None
CDT1	-0.31162	8.37568	-4.0445	0.00347483	0.0556473	-1.57895	None
ABCC2	0.697218	9.73317	4.04408	0.00347692	0.0556473	-1.57954	None
USP7	-0.302017	9.65451	-4.0431	0.00348174	0.0556801	-1.58091	None
CENPH	-0.588857	8.69133	-4.04219	0.00348624	0.0557077	-1.58218	None
SEMA3E	0.358171	5.11001	4.03956	0.00349928	0.0558391	-1.58587	None
EIF4G3	0.412029	7.61167	4.03941	0.00350002	0.0558391	-1.58608	None
AK1	0.357621	7.56895	4.03771	0.0035085	0.0558694	-1.58847	None
CARF	0.332026	4.54488	4.03752	0.00350945	0.0558694	-1.58874	None
MXRA7	-0.397229	6.08279	-4.03733	0.00351039	0.0558694	-1.589	None
SUCLA2	-0.413674	9.78663	-4.0368	0.00351304	0.0558694	-1.58975	None
TVP23B /// TVP23C	0.465655	10.1351	4.03552	0.00351941	0.0559112	-1.59154	None
SLC35F3	0.799313	8.42824	4.03516	0.00352125	0.0559112	-1.59205	None
LAMP3	0.406003	3.96786	4.0296	0.00354918	0.0563103	-1.59986	None
ATP2A2	-1.0426	8.29442	-4.02879	0.00355327	0.0563307	-1.601	Down
SVIL /// SVILP1	0.592312	6.16517	4.02661	0.00356428	0.0563886	-1.60405	None
CDCA7L	-0.610072	7.84581	-4.02656	0.00356454	0.0563886	-1.60412	None
TCP10L	0.394338	3.69831	4.0264	0.00356535	0.0563886	-1.60435	None
UTP14A	0.28035	6.39331	4.0249	0.00357297	0.0564463	-1.60646	None
IQGAP3	-0.966532	5.66578	-4.02458	0.00357462	0.0564463	-1.60691	None
OCLN	0.56953	7.34397	4.0236	0.00357957	0.0564802	-1.60828	None
KRT222	-0.316682	3.73734	-4.02193	0.00358811	0.0565136	-1.61063	None
CHPF2	0.448437	8.46648	4.02177	0.00358889	0.0565136	-1.61085	None
TBC1D17	0.394475	8.51602	4.02153	0.00359013	0.0565136	-1.61119	None
LRRC45	-0.460929	7.24583	-4.02056	0.0035951	0.0565475	-1.61256	None
TM2D3	0.291295	9.75352	4.01961	0.00359994	0.0565566	-1.61388	None
TNPO1	0.4851	11.6111	4.01935	0.00360131	0.0565566	-1.61426	None
SP9	0.296292	6.84576	4.01731	0.00361178	0.0566616	-1.61713	None
SCMH1	-0.352162	6.7288	-4.01695	0.00361364	0.0566616	-1.61763	None
RASA4 /// LOC102724229	0.329301	5.7094	4.01583	0.0036194	0.0567076	-1.61921	None
ULK1	-0.402661	7.11861	-4.01412	0.0036282	0.0567494	-1.62161	None
CIAPIN1	-1.02389	9.502	-4.01375	0.00363012	0.0567494	-1.62213	Down
FLYWCH1	0.397043	5.85338	4.01367	0.00363054	0.0567494	-1.62224	None
E2F1	-1.01639	7.24896	-4.01197	0.00363931	0.0568423	-1.62463	Down
THBD	-0.309037	6.20798	-4.01129	0.00364286	0.0568535	-1.62559	None
STOML2	-0.331096	10.7712	-4.00972	0.003651	0.0569165	-1.6278	None
CCDC159	0.45624	5.73619	4.00916	0.0036539	0.0569165	-1.62858	None
SIAH1	-0.269921	8.23304	-4.00888	0.0036554	0.0569165	-1.62898	None
CCT2	-0.26391	11.6358	-4.00765	0.00366177	0.056955	-1.63071	None
WNT1	0.327019	4.77621	4.00731	0.00366354	0.056955	-1.63118	None
IL3RA	0.341564	5.47792	4.00435	0.00367906	0.0570892	-1.63536	None
HSD17B10	-0.271643	10.6204	-4.00409	0.0036804	0.0570892	-1.63572	None
NAP1L2	0.840013	5.89096	4.00396	0.00368107	0.0570892	-1.6359	None
RPS6KA3	-0.359907	7.57059	-4.00349	0.00368354	0.0570892	-1.63656	None
CHRNE	0.330575	5.40864	4.00192	0.00369179	0.057173	-1.63877	None
SLIT3	0.40104	7.02138	3.99982	0.00370289	0.057248	-1.64174	None
ZNF395 /// FBXO16	-0.679979	7.37206	-3.99903	0.00370704	0.057248	-1.64284	None
TMEM189	0.345892	8.83499	3.99878	0.00370837	0.057248	-1.6432	None
KCNAB1	0.326247	5.7426	3.99777	0.0037137	0.057248	-1.64462	None
C12orf73	0.367028	4.5643	3.99738	0.0037158	0.057248	-1.64517	None
FRS2	0.850442	7.2889	3.99728	0.00371633	0.057248	-1.64532	None
SAP30L	-0.318151	7.24026	-3.99723	0.00371659	0.057248	-1.64538	None
PLGLB2 /// PLGLB1 /// PLGLA	0.445021	5.22661	3.99574	0.00372449	0.0573258	-1.64748	None
LAPTM4B	-1.36829	10.4198	-3.99411	0.00373318	0.0574154	-1.64978	Down
RAB6B	0.554206	5.86341	3.99294	0.00373942	0.0574675	-1.65144	None
APPL2	-0.38678	6.83154	-3.99147	0.00374723	0.0575435	-1.6535	None
CTSF	0.287519	7.17937	3.98598	0.00377675	0.0579525	-1.66125	None
PRCP	0.318572	8.66151	3.98466	0.00378386	0.0580078	-1.66311	None
SLC25A17	-0.271894	8.27455	-3.98424	0.00378613	0.0580078	-1.6637	None
MAP3K2	-0.330584	7.06719	-3.98211	0.00379769	0.0581405	-1.66671	None
IL4I1	0.828382	6.92654	3.97723	0.00382421	0.0584848	-1.67358	None
GLYCTK	-0.324103	4.42802	-3.97691	0.003826	0.0584848	-1.67405	None
RNF5 /// RNF5P1	0.265048	9.54358	3.97355	0.00384438	0.0586776	-1.67878	None
TMEM123	0.395341	9.9751	3.97225	0.00385156	0.0586776	-1.68063	None
TPM1	-0.734986	11.1947	-3.97174	0.00385434	0.0586776	-1.68134	None
TRIO	0.629589	8.01773	3.97172	0.00385447	0.0586776	-1.68137	None
CTSK	-0.299456	6.37674	-3.97156	0.00385534	0.0586776	-1.6816	None
SNX7	-0.365146	8.47214	-3.97092	0.00385888	0.0586776	-1.6825	None
MRPL41	-0.308018	9.67891	-3.97052	0.0038611	0.0586776	-1.68307	None
TMEM87B	0.324007	7.12015	3.97036	0.00386198	0.0586776	-1.6833	None
PTBP1	-0.91988	10.7138	-3.96832	0.00387327	0.0588046	-1.68618	None
BFAR	0.299461	9.66508	3.96763	0.00387706	0.0588107	-1.68715	None
EFR3A	0.310687	9.48373	3.96645	0.00388366	0.0588107	-1.68883	None
SWAP70	0.317992	7.27179	3.96623	0.00388488	0.0588107	-1.68914	None
LGALS3BP	0.392855	10.1216	3.96609	0.00388563	0.0588107	-1.68933	None
GGPS1	0.719367	7.64125	3.96511	0.00389108	0.0588107	-1.69071	None
KDM4C	-0.296728	5.66636	-3.96508	0.00389124	0.0588107	-1.69075	None
HEXA	0.395648	9.8167	3.96357	0.00389966	0.0588937	-1.69289	None
THRSP	0.317441	5.42992	3.96188	0.0039091	0.0589636	-1.69528	None
CCBE1	-0.521622	4.96067	-3.96169	0.00391016	0.0589636	-1.69555	None
SMIM13	-0.820738	7.0768	-3.96079	0.00391521	0.0589803	-1.69682	None
EHBP1L1	-0.631273	8.08808	-3.95936	0.00392326	0.0589803	-1.69885	None
CPSF4	-0.911333	8.82026	-3.95914	0.00392447	0.0589803	-1.69915	None
EIF2B3	-0.272002	9.29195	-3.959	0.00392526	0.0589803	-1.69935	None
SRRM3	0.344232	5.75819	3.95888	0.00392595	0.0589803	-1.69953	None
CDK19	0.295692	8.17266	3.95504	0.0039476	0.0592263	-1.70496	None
DDTL	0.297481	5.95484	3.95385	0.00395433	0.0592263	-1.70664	None
MED27	-0.336011	8.43216	-3.95384	0.00395436	0.0592263	-1.70665	None
FDX1	-0.429394	6.25423	-3.95327	0.00395759	0.0592263	-1.70746	None
ZNF609	-0.266532	6.58628	-3.95301	0.00395907	0.0592263	-1.70783	None
ANKRD46	0.946398	7.52883	3.9521	0.00396425	0.0592263	-1.70912	None
POF1B	-0.635889	5.05638	-3.95162	0.00396699	0.0592263	-1.7098	None
ARL8A	0.330485	5.74672	3.95133	0.00396862	0.0592263	-1.71021	None
GUCD1	-0.362332	8.17926	-3.95129	0.00396886	0.0592263	-1.71027	None
TRNP1	0.620594	10.3323	3.95057	0.00397292	0.0592427	-1.71128	None
ZNF571	0.48573	4.33466	3.9476	0.00398986	0.059416	-1.71548	None
TEX2	-0.319459	7.47445	-3.9475	0.00399045	0.059416	-1.71563	None
HERC2P3 /// HERC2P2	-0.296902	7.60562	-3.94616	0.00399814	0.0594466	-1.71753	None
GABPB1 /// FLJ10038	-0.294429	8.00279	-3.94582	0.00400009	0.0594466	-1.71801	None
KHNYN	-0.278812	8.2959	-3.94559	0.00400138	0.0594466	-1.71833	None
PAM16 /// CORO7-PAM16	-0.302085	8.98869	-3.94473	0.00400635	0.0594763	-1.71956	None
RRAGD	0.659333	6.40366	3.94352	0.00401328	0.0595096	-1.72127	None
NXT2	-0.284005	7.12921	-3.94288	0.00401697	0.0595096	-1.72217	None
SLITRK3	0.278063	3.47459	3.94279	0.00401748	0.0595096	-1.7223	None
GPR119	0.33564	4.82286	3.94127	0.00402629	0.0595806	-1.72446	None
HSF4	0.302485	6.51608	3.94093	0.0040282	0.0595806	-1.72493	None
CRYGS	-0.266384	4.58565	-3.93851	0.00404226	0.0597358	-1.72838	None
MAFK	0.272378	8.9072	3.9381	0.00404464	0.0597358	-1.72896	None
FH	-0.399779	9.96021	-3.93506	0.00406229	0.0599077	-1.73326	None
TGM4	0.309885	4.71057	3.93505	0.00406236	0.0599077	-1.73328	None
FANCE	-0.323472	3.97947	-3.93443	0.00406595	0.0599077	-1.73415	None
HLA-B /// HLA-C	0.587948	4.08036	3.93405	0.00406821	0.0599077	-1.7347	None
MYD88	-0.959525	6.44476	-3.92984	0.00409287	0.0601962	-1.74067	None
DPY30	-0.3926	10.8276	-3.92958	0.00409437	0.0601962	-1.74103	None
BICC1	0.465961	8.65627	3.92917	0.00409679	0.0601962	-1.74162	None
HOOK1	-0.333458	5.1295	-3.92738	0.00410736	0.0602724	-1.74416	None
BTBD11	0.397194	10.4132	3.92704	0.00410936	0.0602724	-1.74464	None
PDSS2	-0.339061	7.61146	-3.92676	0.00411098	0.0602724	-1.74503	None
SNX2	0.295749	10.3612	3.92561	0.00411778	0.060328	-1.74666	None
TRMT2B	-0.471983	7.17368	-3.92435	0.00412526	0.0603935	-1.74846	None
PTPN13	-0.724368	6.28211	-3.92172	0.00414086	0.0605595	-1.75219	None
SLC38A1	-0.70356	7.94191	-3.92143	0.00414262	0.0605595	-1.75261	None
ESYT2	-0.277797	9.68708	-3.9195	0.00415413	0.0606615	-1.75535	None
B4GALT3	-0.266531	8.2031	-3.9186	0.00415948	0.0606615	-1.75662	None
RCAN3	-0.34435	6.62503	-3.91849	0.00416017	0.0606615	-1.75678	None
SPECC1L	-0.346839	7.87754	-3.91775	0.00416458	0.0606615	-1.75783	None
FAM120AOS	-0.304413	8.55376	-3.91773	0.0041647	0.0606615	-1.75786	None
S100A3	0.594607	9.83517	3.91573	0.00417667	0.0607918	-1.7607	None
ZNF343	-0.303527	7.26194	-3.91486	0.00418193	0.0608242	-1.76194	None
ARRDC2	-0.259464	8.03392	-3.9125	0.00419611	0.0609594	-1.76529	None
TRIM31	0.392359	4.51965	3.91231	0.00419729	0.0609594	-1.76556	None
CLEC11A	-0.434961	7.60026	-3.90789	0.00422402	0.0613032	-1.77184	None
TMEM60	0.30752	8.46152	3.90735	0.00422734	0.0613071	-1.77261	None
ODAM	0.301817	3.64608	3.90578	0.00423691	0.0613904	-1.77485	None
NELFB	-0.297715	8.79483	-3.90534	0.00423956	0.0613904	-1.77547	None
FAM89A	-0.326027	7.32895	-3.9049	0.00424226	0.0613904	-1.77609	None
CCM2	-0.314103	9.3537	-3.90379	0.00424906	0.0614399	-1.77768	None
PPIE	-0.270001	9.16643	-3.90334	0.00425179	0.0614399	-1.77831	None
KIAA1524	-0.496642	8.04004	-3.90155	0.00426278	0.0614751	-1.78086	None
DDA1	0.296044	6.95615	3.90142	0.00426354	0.0614751	-1.78104	None
FAM109A	-0.250685	4.72444	-3.90099	0.00426621	0.0614751	-1.78166	None
DESI1	-0.331099	7.28379	-3.90095	0.00426647	0.0614751	-1.78172	None
MAD2L1	-0.415551	10.7106	-3.89996	0.00427254	0.0614929	-1.78312	None
CENPF	-0.597028	9.32553	-3.89975	0.00427383	0.0614929	-1.78342	None
CT62	-0.307367	4.64741	-3.89843	0.00428195	0.0615491	-1.7853	None
MICU2	0.327154	10.073	3.89812	0.00428386	0.0615491	-1.78574	None
MAGT1	0.278509	8.69743	3.89663	0.00429308	0.0616375	-1.78786	None
FBP1	0.469776	4.80056	3.89548	0.00430021	0.0616958	-1.7895	None
AJUBA	0.313448	7.37121	3.8948	0.00430441	0.0617119	-1.79047	None
CPT1B /// CHKB-CPT1B	-0.37439	5.82171	-3.89397	0.00430957	0.0617418	-1.79165	None
TSR3	-1.50401	8.42162	-3.8932	0.00431432	0.0617462	-1.79274	Down
ASPHD1	0.8246	7.87996	3.89293	0.00431603	0.0617462	-1.79313	None
ZMYND8	-0.312895	6.92719	-3.88887	0.00434137	0.0619932	-1.79892	None
GCK	0.344388	5.33335	3.8887	0.0043424	0.0619932	-1.79915	None
HIRIP3	-0.443611	8.26467	-3.88868	0.00434255	0.0619932	-1.79919	None
PSD3	-0.331249	8.12553	-3.88798	0.00434694	0.0620118	-1.80018	None
DHRS13	-0.308151	6.93872	-3.88698	0.00435318	0.0620474	-1.8016	None
TRMT10B	-0.402069	6.57734	-3.88578	0.00436077	0.0620474	-1.80332	None
ZFAND2A	-0.275288	9.32151	-3.88568	0.00436135	0.0620474	-1.80345	None
PLCB1	0.772028	5.41735	3.88561	0.00436179	0.0620474	-1.80355	None
WDR5	-0.267945	9.56217	-3.88455	0.00436852	0.0620662	-1.80508	None
CYR61	0.781342	9.68413	3.88442	0.00436929	0.0620662	-1.80525	None
SF1	-0.26613	9.45586	-3.88334	0.00437611	0.0621192	-1.80679	None
WDR90	-0.331717	7.5066	-3.88171	0.00438645	0.0622199	-1.80913	None
USO1	0.416488	10.112	3.88042	0.00439462	0.0622199	-1.81096	None
EMSY	-0.54681	6.30085	-3.88039	0.00439478	0.0622199	-1.811	None
PRAMEF1 /// PRAMEF2 /// PRAMEF13 /// PRAMEF14	0.334942	10.5895	3.88026	0.0043956	0.0622199	-1.81119	None
LRIG1	0.404669	5.50988	3.87844	0.00440717	0.0623116	-1.81378	None
STX12	0.30569	8.08716	3.87826	0.00440828	0.0623116	-1.81403	None
PRKAG2	0.450212	9.13833	3.87353	0.00443853	0.062695	-1.82079	None
SLC25A14	-0.336925	7.79861	-3.87233	0.00444622	0.0627595	-1.8225	None
GPR37L1	0.304115	6.28508	3.87035	0.00445896	0.0628902	-1.82533	None
GSKIP	0.292862	9.33939	3.86992	0.00446174	0.0628902	-1.82594	None
HDGF	-0.262862	11.8218	-3.86717	0.00447947	0.0630958	-1.82986	None
NOL12	0.276109	8.76736	3.86563	0.00448947	0.0631919	-1.83207	None
BTN2A2	0.749622	5.81294	3.86515	0.00449258	0.0631919	-1.83275	None
TRIM68	-0.287184	5.6364	-3.86399	0.00450008	0.0632531	-1.8344	None
CIRBP	-0.301717	10.0005	-3.86203	0.00451289	0.0633888	-1.83721	None
RGS17	0.495769	7.91535	3.86034	0.00452389	0.0634751	-1.83961	None
UBAC1	-0.83259	8.54207	-3.86012	0.00452536	0.0634751	-1.83994	None
SVBP	0.32478	7.78114	3.85962	0.0045286	0.0634763	-1.84064	None
TLE3	-0.373131	5.81142	-3.85845	0.00453631	0.06354	-1.84233	None
MYEF2	0.285321	7.95231	3.85673	0.00454759	0.0636222	-1.84478	None
ZNF266	0.307623	7.0315	3.85659	0.00454852	0.0636222	-1.84498	None
PDZK1 /// PDZK1P1	-0.337969	4.58722	-3.85494	0.00455939	0.0637078	-1.84734	None
TGFBRAP1	-0.642487	6.65878	-3.8547	0.00456098	0.0637078	-1.84768	None
POLR2D	-0.269399	7.47299	-3.85281	0.00457344	0.0638375	-1.85038	None
SNORD12B	-0.342898	4.58372	-3.84947	0.00459559	0.0641021	-1.85516	None
SLC25A25	0.27189	7.83386	3.84886	0.00459963	0.0641139	-1.85602	None
BCAT1	-0.633604	8.04427	-3.8402	0.00465769	0.0648782	-1.86842	None
TRA2B	-0.428055	11.4846	-3.83734	0.00467701	0.0649582	-1.87251	None
ITGAX	0.383339	5.50219	3.83711	0.0046786	0.0649582	-1.87285	None
HHIPL2	0.317464	7.22528	3.837	0.00467936	0.0649582	-1.87301	None
RHCG	0.310406	6.6206	3.8368	0.00468072	0.0649582	-1.8733	None
CASP4	0.361612	5.93846	3.83666	0.00468165	0.0649582	-1.87349	None
BZW2	-0.585289	9.10212	-3.83637	0.00468359	0.0649582	-1.8739	None
BRD7	-0.25844	8.84815	-3.83502	0.00469281	0.0649582	-1.87585	None
FOLR2	0.253634	5.6022	3.83485	0.00469397	0.0649582	-1.87609	None
FAM45BP /// FAM45A	0.276244	8.97819	3.83443	0.00469679	0.0649582	-1.87668	None
ARHGAP9	0.300987	5.14316	3.83393	0.00470022	0.0649582	-1.8774	None
LPAR1	-0.287048	8.93872	-3.83387	0.0047006	0.0649582	-1.87748	None
CDC42EP2	0.539397	7.47267	3.83363	0.00470224	0.0649582	-1.87783	None
IPO9	-0.250489	7.9042	-3.83232	0.00471119	0.065037	-1.87971	None
TRIM21	0.279104	7.29724	3.83159	0.00471616	0.0650406	-1.88075	None
ITSN1	0.34137	6.63091	3.83128	0.00471832	0.0650406	-1.8812	None
INTS1	-0.359317	8.04864	-3.83073	0.00472204	0.0650406	-1.88198	None
IRAK2	1.52832	7.44301	3.83039	0.0047244	0.0650406	-1.88248	Up
ARMCX5	0.256182	8.19804	3.82761	0.00474348	0.0652398	-1.88646	None
MTHFD2	-0.301093	11.5997	-3.82734	0.00474536	0.0652398	-1.88685	None
PAX2	0.428468	4.2034	3.82377	0.00476998	0.0654531	-1.89197	None
DUSP3	-1.01257	7.28867	-3.82286	0.00477627	0.0654531	-1.89327	Down
SAFB2	-0.260995	8.95957	-3.82283	0.00477645	0.0654531	-1.89331	None
EIF2A	0.268191	4.94705	3.82254	0.00477849	0.0654531	-1.89373	None
COA7	0.26149	8.58469	3.82191	0.00478284	0.0654531	-1.89463	None
KCNT2	-0.300882	3.70682	-3.82186	0.00478323	0.0654531	-1.89471	None
SLC25A11	-0.391165	9.29324	-3.82168	0.00478443	0.0654531	-1.89496	None
TARS	-0.762995	11.3372	-3.82132	0.00478695	0.0654531	-1.89548	None
PBLD	0.356927	7.18445	3.82002	0.00479596	0.0654933	-1.89734	None
PTRF	0.359986	10.773	3.81996	0.0047964	0.0654933	-1.89743	None
ADRA1A	0.253012	4.15025	3.81948	0.00479974	0.0654942	-1.89811	None
ZNF585B /// ZNF585A	0.29181	6.53274	3.81858	0.00480606	0.0655039	-1.89941	None
CRP	-0.285007	4.91234	-3.81845	0.00480697	0.0655039	-1.8996	None
KCTD15	-0.78541	7.61658	-3.81746	0.00481387	0.0655535	-1.90102	None
POP5	-0.735054	9.71157	-3.81649	0.0048206	0.0655716	-1.9024	None
CSNK1G2	-0.395057	8.86686	-3.81633	0.00482173	0.0655716	-1.90263	None
POLE2	-0.653672	9.16437	-3.81532	0.00482883	0.0656002	-1.90408	None
EIF3J	-0.807918	8.11769	-3.8151	0.00483036	0.0656002	-1.9044	None
CHTF18	-0.264466	8.60205	-3.81435	0.00483564	0.0656275	-1.90548	None
HERC2P5 /// HERC2P8 /// HERC2P4	0.309613	6.97452	3.81381	0.00483943	0.0656346	-1.90625	None
LOC100268168	0.365722	4.13639	3.81184	0.00485332	0.0657785	-1.90908	None
C2orf48	-0.394082	3.18774	-3.81106	0.00485878	0.0658081	-1.9102	None
TMEM185B	0.48987	8.74818	3.81005	0.00486591	0.0658602	-1.91165	None
LCE1E	0.312878	6.63043	3.80886	0.00487437	0.0659303	-1.91336	None
POFUT1	-0.299987	3.81467	-3.80607	0.00489415	0.0661534	-1.91737	None
CCNG1	0.969955	10.9648	3.80457	0.00490482	0.0662279	-1.91952	None
INO80C	-0.239936	9.14461	-3.80437	0.00490626	0.0662279	-1.91981	None
PHC2	-0.335746	8.03955	-3.8013	0.00492818	0.0664387	-1.92421	None
KRT18	-0.352237	13.5626	-3.80106	0.00492992	0.0664387	-1.92456	None
AHSA2	-0.283273	7.73196	-3.80047	0.00493416	0.0664387	-1.92541	None
TSPAN15	0.285292	9.65512	3.80034	0.0049351	0.0664387	-1.9256	None
CDCA2	-0.256175	9.04411	-3.79907	0.00494422	0.0665168	-1.92742	None
UBE3D	-0.307366	6.66674	-3.79668	0.00496142	0.0666221	-1.93086	None
SETD7	-0.537627	4.69314	-3.79612	0.00496551	0.0666221	-1.93167	None
LINC00312 /// LMCD1	-0.411461	6.915	-3.79602	0.00496621	0.0666221	-1.93181	None
CHL1	-0.314436	3.59583	-3.7957	0.0049685	0.0666221	-1.93227	None
SUN2	-0.261543	7.69686	-3.79568	0.00496863	0.0666221	-1.93229	None
TPRG1L	0.305729	7.67291	3.79405	0.00498044	0.0666402	-1.93464	None
PIGS	0.270323	10.2649	3.79396	0.00498111	0.0666402	-1.93477	None
PRR3	-0.295032	7.17658	-3.79387	0.00498177	0.0666402	-1.9349	None
LEPROTL1	-1.72982	8.58093	-3.79362	0.00498355	0.0666402	-1.93526	Down
MBOAT7	-1.07323	8.27395	-3.79321	0.00498657	0.0666402	-1.93585	Down
ETV4	-0.480418	7.8726	-3.79238	0.00499258	0.0666435	-1.93705	None
STIM2	0.324856	6.63604	3.79226	0.00499346	0.0666435	-1.93722	None
ANKRD29	0.64974	7.55161	3.79062	0.00500541	0.0667259	-1.93958	None
GRHL3	0.650514	7.23314	3.7905	0.00500627	0.0667259	-1.93975	None
BIN1	-0.264406	8.86897	-3.78757	0.00502762	0.0669418	-1.94396	None
MRPL12	-0.250062	10.6439	-3.78737	0.00502913	0.0669418	-1.94425	None
COMMD3	-0.356472	10.0178	-3.78637	0.00503641	0.0669943	-1.94568	None
PILRB /// STAG3L5P-PVRIG2P-PILRB	-0.327683	8.17247	-3.78478	0.0050481	0.067006	-1.94797	None
SNX10	-0.609722	5.49224	-3.78389	0.00505465	0.067006	-1.94926	None
UTP23	0.263969	8.52819	3.78375	0.00505568	0.067006	-1.94946	None
GLI1	-0.493836	5.94865	-3.78334	0.00505868	0.067006	-1.95004	None
MORC2	-0.293706	8.60572	-3.7832	0.00505977	0.067006	-1.95026	None
C5orf15	0.719005	10.5138	3.78315	0.00506013	0.067006	-1.95033	None
ANKRD36B /// ANKRD36	0.284412	3.69221	3.78237	0.00506589	0.067006	-1.95145	None
SDAD1 /// SDAD1P1	0.289222	6.3977	3.78219	0.00506722	0.067006	-1.95171	None
CD2AP	0.435195	9.10404	3.7821	0.00506786	0.067006	-1.95184	None
SEC22C	-0.253367	6.91008	-3.78161	0.00507145	0.067006	-1.95254	None
ZBTB45	-0.320052	7.40679	-3.78127	0.00507399	0.067006	-1.95303	None
CLEC1A	0.275174	5.87744	3.77794	0.00509867	0.0672877	-1.95783	None
MAPKAP1	-0.280826	8.82474	-3.77678	0.00510728	0.067357	-1.95949	None
GLG1	0.252333	7.74453	3.77606	0.00511267	0.067384	-1.96054	None
DDR2	0.359329	5.6606	3.7738	0.00512954	0.0675347	-1.96379	None
ZNF354A	-0.440719	6.71409	-3.77336	0.00513282	0.0675347	-1.96442	None
SHC1	-0.706159	8.51582	-3.77246	0.00513957	0.0675347	-1.96572	None
GDF15	0.294198	10.8568	3.77242	0.00513987	0.0675347	-1.96578	None
RNASEH2A	-0.37114	9.36474	-3.77169	0.00514535	0.0675347	-1.96683	None
MROH1	0.267768	7.42641	3.77155	0.00514641	0.0675347	-1.96704	None
HYOU1	-0.362714	6.60919	-3.77138	0.00514765	0.0675347	-1.96727	None
EFCAB7	-0.520417	5.69842	-3.77054	0.00515399	0.0675738	-1.96849	None
PPDPF	-1.67764	7.12415	-3.76792	0.00517369	0.0677487	-1.97226	Down
ZFAND3	0.252357	8.10457	3.76787	0.00517408	0.0677487	-1.97234	None
KATNA1	-0.32511	6.51807	-3.76739	0.00517773	0.0677524	-1.97303	None
UPF2	-0.280578	6.61963	-3.76448	0.00519969	0.0679955	-1.97722	None
PLS1	-0.387208	9.76499	-3.76182	0.00521994	0.0682158	-1.98106	None
COL21A1	0.439458	7.44018	3.76089	0.00522707	0.0682646	-1.98241	None
PRIM1	-0.563014	9.73977	-3.7603	0.00523152	0.0682783	-1.98325	None
SURF2	-0.24072	8.82035	-3.75906	0.00524102	0.0683561	-1.98504	None
ALDOAP2	0.27595	4.80664	3.75863	0.00524428	0.0683561	-1.98566	None
ANAPC4	-0.313088	8.70251	-3.75774	0.00525112	0.0683643	-1.98694	None
HEXIM2	-0.329698	8.37731	-3.75766	0.00525172	0.0683643	-1.98706	None
R3HCC1	-0.502651	8.94198	-3.75605	0.00526408	0.0684713	-1.98938	None
LONRF3	0.309992	6.71238	3.7557	0.00526676	0.0684713	-1.98988	None
EIF2D	-0.611305	8.87918	-3.75525	0.00527025	0.0684723	-1.99054	None
GAN	0.417149	6.08461	3.75473	0.00527429	0.0684806	-1.9913	None
BHLHE40	-0.443058	8.71531	-3.75424	0.005278	0.0684845	-1.99199	None
OK/SW-CL.36	0.276319	4.21636	3.75157	0.00529863	0.0686849	-1.99585	None
ITPKC	0.399473	7.32877	3.75136	0.00530029	0.0686849	-1.99616	None
ANKRD1	0.299482	4.28013	3.75085	0.00530427	0.0686922	-1.9969	None
FRZB	0.321145	3.53945	3.75029	0.00530859	0.0687038	-1.9977	None
IFNAR1	0.336698	8.34331	3.74966	0.00531344	0.068709	-1.9986	None
ABI3BP	0.39304	4.82766	3.74892	0.00531921	0.068709	-1.99968	None
YWHAZ	-0.278609	11.6423	-3.74892	0.00531925	0.068709	-1.99969	None
SIK3	0.271178	7.08647	3.74614	0.0053409	0.0688404	-2.0037	None
NSMCE4A	-0.492894	10.0926	-3.74586	0.00534306	0.0688404	-2.0041	None
SYNGR4	0.428907	7.30953	3.74585	0.00534312	0.0688404	-2.00411	None
ZNF574	0.292654	8.75297	3.74578	0.0053437	0.0688404	-2.00422	None
ZNF684	-0.340458	5.28518	-3.74493	0.00535031	0.0688404	-2.00544	None
RSRC1	-0.499366	8.48504	-3.7449	0.00535055	0.0688404	-2.00548	None
RNF170	0.271592	4.44491	3.74453	0.00535347	0.0688404	-2.00602	None
SESN1	0.818108	8.21083	3.7441	0.00535684	0.0688404	-2.00665	None
CYP1A1	0.40431	5.77239	3.74353	0.00536126	0.0688531	-2.00746	None
UCN	0.336524	7.00287	3.74125	0.0053792	0.0689023	-2.01076	None
RASA1	-1.30165	7.95728	-3.74108	0.00538051	0.0689023	-2.011	Down
DCLK1	-0.420399	4.47937	-3.74104	0.00538082	0.0689023	-2.01106	None
GSN	0.364933	8.7634	3.74103	0.00538089	0.0689023	-2.01107	None
MLH1	-0.342508	9.20456	-3.74056	0.00538461	0.0689023	-2.01176	None
TC2N	-0.534967	4.09278	-3.74043	0.00538567	0.0689023	-2.01195	None
MBLAC2	-0.487705	3.31601	-3.73939	0.00539381	0.0689315	-2.01344	None
SUMF1	0.795832	9.65473	3.73927	0.00539482	0.0689315	-2.01363	None
NUDT11	0.333308	5.56888	3.73845	0.00540124	0.0689679	-2.0148	None
TRERF1	-0.273403	6.15446	-3.73804	0.00540453	0.0689679	-2.0154	None
MILR1	0.335419	5.938	3.73739	0.00540965	0.0689894	-2.01634	None
SPATA33	-0.287166	6.96922	-3.73542	0.00542528	0.0691448	-2.01919	None
USP9Y	0.310673	6.39246	3.73474	0.00543062	0.0691468	-2.02016	None
NFE2L3	1.47409	7.6408	3.73453	0.00543232	0.0691468	-2.02047	Up
SNHG15 /// SNORA9	-0.443402	4.52062	-3.73406	0.00543609	0.0691509	-2.02116	None
CDC5L	-0.274155	9.24302	-3.73058	0.00546379	0.069456	-2.02618	None
NFXL1	-0.310612	6.71734	-3.73018	0.00546699	0.069456	-2.02676	None
SLC31A2	0.250533	7.65855	3.72964	0.0054713	0.0694669	-2.02754	None
ZNF425	1.00855	6.34354	3.72881	0.00547797	0.0695076	-2.02874	Up
DXO /// TUBB2B	0.273407	7.71826	3.728	0.00548453	0.0695469	-2.02993	None
STXBP1	-0.290732	8.26332	-3.7264	0.00549739	0.0696227	-2.03224	None
TMBIM1	0.248826	8.33516	3.72639	0.00549744	0.0696227	-2.03225	None
GLCE	-0.618764	7.04596	-3.72329	0.00552249	0.0698865	-2.03674	None
ORC4	-0.335228	6.45254	-3.72264	0.00552768	0.0698865	-2.03767	None
UTP14C /// UTP14A	0.304419	9.41604	3.72252	0.00552871	0.0698865	-2.03786	None
ATP1B3	-0.358064	8.79823	-3.71928	0.00555497	0.0701212	-2.04254	None
FOXC1	-0.317135	7.63368	-3.7192	0.0055556	0.0701212	-2.04265	None
PITRM1	-0.287006	9.3076	-3.71882	0.00555877	0.0701212	-2.04321	None
RIPPLY2	0.411463	3.89971	3.71851	0.00556124	0.0701212	-2.04365	None
LINC01605	0.248499	5.16312	3.71716	0.00557225	0.0701869	-2.04561	None
C14orf159	-0.320659	6.64122	-3.71702	0.00557344	0.0701869	-2.04582	None
2007-03-01	0.343714	8.63228	3.7133	0.00560388	0.0705261	-2.0512	None
HAUS5	-0.51799	5.99057	-3.71185	0.00561578	0.0706017	-2.0533	None
WDR5 /// LOC401127	-0.62023	8.6336	-3.71172	0.00561693	0.0706017	-2.0535	None
NUDT12	0.580891	4.40667	3.70991	0.00563179	0.070679	-2.05611	None
SBNO1	-0.299684	10.412	-3.70985	0.00563233	0.070679	-2.05621	None
HMGN3	-0.700937	7.97446	-3.70969	0.00563363	0.070679	-2.05643	None
NATD1	0.766215	6.23103	3.70732	0.00565327	0.0708811	-2.05987	None
PLCD1	0.315767	7.02271	3.70611	0.00566326	0.0709197	-2.06162	None
OCRL	-0.272822	7.68377	-3.7061	0.00566341	0.0709197	-2.06164	None
PADI1	0.275337	6.56888	3.70488	0.00567352	0.071002	-2.06341	None
NKRF	0.250982	9.06303	3.70241	0.00569411	0.0711757	-2.06699	None
ZNF436	0.280325	5.90334	3.702	0.00569757	0.0711757	-2.06759	None
SIVA1	-0.532639	10.2473	-3.70194	0.00569802	0.0711757	-2.06767	None
PCDHA3	0.395966	6.29359	3.70115	0.00570468	0.0712146	-2.06882	None
NOTCH1	1.05623	5.99632	3.70072	0.0057083	0.0712154	-2.06945	Up
TMEM187	0.292758	8.24398	3.69867	0.00572552	0.071386	-2.07242	None
NCK1	0.286825	8.15298	3.69733	0.00573676	0.0714818	-2.07436	None
HNRNPR	-0.247287	12.0871	-3.69534	0.0057535	0.0716459	-2.07724	None
DHX16	-0.369972	6.84068	-3.69447	0.00576092	0.0716939	-2.07852	None
ZNF687	0.304409	6.45086	3.69393	0.00576545	0.0717057	-2.07929	None
APBA3	0.33615	7.59667	3.69272	0.00577577	0.0717887	-2.08106	None
PDIA3	0.350858	7.31667	3.6923	0.00577927	0.0717887	-2.08166	None
LCE1A	0.291885	8.5975	3.69106	0.00578986	0.0718547	-2.08347	None
PHF19	-0.676801	9.80866	-3.69084	0.00579174	0.0718547	-2.08379	None
BIRC2	0.413912	9.98099	3.69027	0.00579652	0.0718697	-2.0846	None
ALYREF	-0.719348	10.9	-3.68828	0.0058135	0.0720358	-2.08749	None
SCN10A	0.239617	4.13791	3.68567	0.00583586	0.0722033	-2.09129	None
FAM166A	0.257417	5.42985	3.68564	0.00583614	0.0722033	-2.09133	None
ARHGEF10L	0.313769	6.42892	3.68544	0.00583781	0.0722033	-2.09162	None
ZP3	0.257765	8.88669	3.68292	0.00585949	0.0724269	-2.09528	None
CTSZ	-0.434688	8.0802	-3.68231	0.00586477	0.0724476	-2.09617	None
SMC5	-0.42217	7.72159	-3.68102	0.00587589	0.0725081	-2.09804	None
ARL2BP	-0.233229	9.42665	-3.68091	0.00587689	0.0725081	-2.09821	None
LINC01424	0.272469	3.75862	3.67867	0.00589628	0.0726012	-2.10147	None
GNL2	-0.304376	9.13039	-3.67852	0.00589756	0.0726012	-2.10168	None
L3HYPDH	0.294961	8.86381	3.67836	0.00589892	0.0726012	-2.10191	None
CNOT6L	-0.722333	5.32924	-3.6782	0.00590031	0.0726012	-2.10214	None
CARHSP1	-1.14793	9.89921	-3.67795	0.0059025	0.0726012	-2.10251	Down
NEK6	0.721818	7.53373	3.67615	0.00591814	0.0727012	-2.10512	None
PNMAL1	-0.28169	8.83552	-3.67613	0.00591833	0.0727012	-2.10515	None
ZNF576	-0.233703	8.04015	-3.67577	0.00592149	0.0727012	-2.10568	None
TAF5	-0.309074	7.46727	-3.67369	0.0059396	0.0728789	-2.1087	None
KRTAP19-5	-0.405962	5.66073	-3.67303	0.00594535	0.0729049	-2.10966	None
TNFSF9	0.52139	8.37715	3.67233	0.00595149	0.0729228	-2.11068	None
CDC20	-0.597146	10.5281	-3.67204	0.00595407	0.0729228	-2.1111	None
TAF1D	0.296571	8.19824	3.6713	0.00596056	0.0729284	-2.11218	None
SMIM24	0.340276	5.66056	3.67116	0.00596179	0.0729284	-2.11238	None
ATP6V1H	0.281636	8.96265	3.67065	0.0059662	0.0729379	-2.11311	None
MS4A4A	0.325365	3.77836	3.66827	0.00598717	0.0730392	-2.11658	None
CA2	-1.45049	5.40934	-3.66803	0.00598932	0.0730392	-2.11694	Down
TFB2M	0.244456	10.7159	3.66775	0.00599179	0.0730392	-2.11734	None
DRAM1	0.660958	7.75399	3.66762	0.00599288	0.0730392	-2.11752	None
ZW10	-0.251461	8.58117	-3.6671	0.00599746	0.0730392	-2.11828	None
ZNF638	0.323019	8.94824	3.66687	0.00599952	0.0730392	-2.11862	None
ASB13	-0.291374	6.72307	-3.66682	0.00599993	0.0730392	-2.11869	None
PRODH2	0.569872	5.60321	3.66528	0.00601361	0.0731614	-2.12094	None
PLA2G4C	1.8893	5.98422	3.6646	0.00601961	0.07319	-2.12192	Up
SPRY1	0.315149	6.78441	3.66389	0.00602595	0.0732063	-2.12296	None
ST6GALNAC2	0.399954	4.27285	3.66363	0.00602824	0.0732063	-2.12334	None
HYAL3	0.258319	6.19752	3.66296	0.00603418	0.0732342	-2.12431	None
PYGB	-0.326972	9.47052	-3.66202	0.00604258	0.0732918	-2.12569	None
ING4	0.244664	7.97937	3.66091	0.00605246	0.0733096	-2.1273	None
CD248	0.260202	5.28071	3.66065	0.00605474	0.0733096	-2.12767	None
CHODL-AS1	-0.286589	4.82046	-3.66062	0.00605499	0.0733096	-2.12771	None
BCL9L	0.298888	8.55643	3.65927	0.00606704	0.0734112	-2.12968	None
DNAJC9	-0.623722	10.5304	-3.65851	0.00607383	0.0734176	-2.13078	None
ZNF160	0.34661	6.19707	3.6584	0.00607488	0.0734176	-2.13095	None
ADAR	-0.311228	4.87253	-3.65688	0.0060885	0.0735056	-2.13317	None
ABCB9	0.30506	5.48751	3.65594	0.00609695	0.0735056	-2.13454	None
RPIA	0.243163	8.86801	3.65567	0.00609938	0.0735056	-2.13493	None
RBM45	-0.290813	8.21788	-3.6556	0.00609993	0.0735056	-2.13502	None
ARIH2OS	-0.337327	4.91282	-3.65555	0.00610046	0.0735056	-2.1351	None
DUSP19	-0.267806	4.28134	-3.65498	0.00610553	0.0735226	-2.13593	None
ZSWIM4	0.324863	5.98044	3.65246	0.00612831	0.0737527	-2.13961	None
FDXR	1.09244	9.57042	3.65097	0.00614173	0.0738274	-2.14177	Up
SUB1	-0.243002	9.41756	-3.6507	0.00614421	0.0738274	-2.14217	None
USP40	-0.288915	8.05827	-3.65051	0.0061459	0.0738274	-2.14244	None
NSMAF	-0.296952	9.9958	-3.65015	0.00614922	0.0738274	-2.14297	None
PIFO	0.395626	4.9468	3.64879	0.0061615	0.0738727	-2.14494	None
CEP295	-0.411329	6.67516	-3.64853	0.00616385	0.0738727	-2.14532	None
ST13	0.252753	9.61852	3.64852	0.00616402	0.0738727	-2.14535	None
LDAH	-0.302553	8.25231	-3.64659	0.00618159	0.0740158	-2.14816	None
EMC1	0.241362	8.54356	3.6464	0.00618334	0.0740158	-2.14844	None
PLA2G4A	-0.335267	9.48381	-3.64547	0.00619174	0.0740201	-2.14978	None
ATXN10	0.406536	7.8533	3.64537	0.00619273	0.0740201	-2.14994	None
BORA	-0.458574	7.49539	-3.64493	0.00619675	0.0740201	-2.15058	None
TMEM125	0.271694	6.57397	3.64474	0.00619844	0.0740201	-2.15085	None
SIM2	-0.404133	5.42884	-3.64301	0.00621434	0.0741659	-2.15338	None
CD27	0.259106	5.42882	3.64161	0.00622716	0.0742748	-2.15542	None
EPB41L2	-0.734564	7.05672	-3.64031	0.0062391	0.0743599	-2.15731	None
MSL3P1	-0.388547	7.82676	-3.63996	0.0062423	0.0743599	-2.15782	None
TVP23A	0.292093	6.3069	3.63963	0.0062454	0.0743599	-2.15831	None
LOC554174	0.367321	5.28002	3.63781	0.00626216	0.0744957	-2.16096	None
MLIP	0.333962	7.09548	3.63759	0.00626423	0.0744957	-2.16128	None
ATF3	0.280161	3.80927	3.63694	0.00627019	0.0745225	-2.16222	None
APBA1 /// LOC101929802	0.376102	4.24559	3.63651	0.00627417	0.0745257	-2.16285	None
DDIAS	-0.668182	8.31394	-3.63491	0.00628906	0.074639	-2.16519	None
BAX	0.561644	10.8435	3.63469	0.00629114	0.074639	-2.16552	None
C7orf61	0.394953	6.39461	3.63324	0.00630462	0.0747548	-2.16763	None
CRCP	-0.267107	8.56722	-3.6322	0.0063143	0.0748253	-2.16915	None
MBD2	-0.786472	7.88822	-3.63148	0.006321	0.0748606	-2.1702	None
ACVR2A	0.347527	6.19434	3.63066	0.00632864	0.0748841	-2.17139	None
TMEM117	0.679253	6.2176	3.63047	0.00633044	0.0748841	-2.17167	None
ECI2	0.248405	10.2703	3.62874	0.00634664	0.0750315	-2.17419	None
VANGL2	0.257766	6.54052	3.62831	0.00635071	0.0750355	-2.17483	None
PSMB8	0.411999	9.10505	3.62744	0.00635885	0.0750858	-2.17609	None
RNF2	0.291927	7.53111	3.62618	0.00637071	0.0750858	-2.17793	None
PNP	-0.360536	10.1774	-3.62558	0.00637632	0.0750858	-2.1788	None
DDX11 /// DDX12P /// LOC642846	-0.298657	8.83554	-3.62533	0.00637866	0.0750858	-2.17917	None
CRISPLD2	1.48594	7.66986	3.62516	0.00638027	0.0750858	-2.17942	Up
RAP2B	0.407938	6.20025	3.62508	0.00638102	0.0750858	-2.17953	None
DCTN4	-1.02939	8.83568	-3.62485	0.00638326	0.0750858	-2.17988	Down
SLX4IP	-0.604011	6.70327	-3.62449	0.00638659	0.0750858	-2.18039	None
DSTNP2	-0.328317	7.66427	-3.62404	0.00639091	0.0750858	-2.18106	None
LSM5	-0.868075	7.27584	-3.62388	0.00639235	0.0750858	-2.18128	None
FAS	0.990208	8.17009	3.62322	0.00639858	0.0751124	-2.18225	None
BST1	-0.388332	8.00477	-3.62253	0.00640516	0.0751124	-2.18326	None
RBM39	-0.416106	8.93477	-3.62239	0.00640649	0.0751124	-2.18347	None
HPN	0.287096	5.99962	3.62188	0.00641127	0.0751124	-2.1842	None
QPRT /// LOC105369247	0.610676	6.55952	3.62133	0.00641653	0.0751124	-2.18502	None
GABRD	0.306775	5.37931	3.62095	0.00642011	0.0751124	-2.18557	None
PRRG1	0.830214	8.39537	3.62088	0.00642079	0.0751124	-2.18567	None
PXDC1	0.401101	7.45716	3.62011	0.00642814	0.0751496	-2.1868	None
CDH4	-0.421385	6.68867	-3.61976	0.00643145	0.0751496	-2.18731	None
ZNF350	0.427378	6.31833	3.6185	0.00644344	0.0752027	-2.18915	None
ASRGL1	-0.404818	7.57979	-3.61849	0.00644349	0.0752027	-2.18916	None
KHSRP	-0.388571	9.42127	-3.61457	0.00648103	0.0755263	-2.1949	None
HMGB1	-0.383252	9.04634	-3.61449	0.00648176	0.0755263	-2.19501	None
IRAK1	-1.35216	8.59619	-3.61422	0.00648435	0.0755263	-2.1954	Down
CCNO	-0.324603	7.29969	-3.61402	0.00648625	0.0755263	-2.19569	None
CAMK1D	-0.45345	5.87161	-3.61168	0.00650881	0.075745	-2.19912	None
PTDSS1	-0.264703	10.1511	-3.60954	0.00652938	0.0758917	-2.20224	None
ZNF622	0.264053	9.71215	3.60939	0.00653085	0.0758917	-2.20246	None
ZNF416	0.259855	6.99343	3.6092	0.00653275	0.0758917	-2.20275	None
KLF10	0.608968	10.5008	3.60861	0.00653839	0.0759134	-2.2036	None
GSK3B	0.275768	7.89438	3.60766	0.0065476	0.0759764	-2.20499	None
TNFRSF9	2.02014	6.1129	3.60705	0.00655355	0.0760002	-2.20589	Up
RGAG1	0.311217	4.50491	3.60648	0.00655911	0.0760002	-2.20673	None
HSF2	0.282996	6.96761	3.60628	0.00656101	0.0760002	-2.20701	None
ZBTB41	0.312258	6.97844	3.6057	0.00656659	0.0760211	-2.20785	None
ZBTB2	-0.319395	6.56266	-3.605	0.00657341	0.0760562	-2.20888	None
PPP6C	-0.715459	7.7266	-3.60421	0.00658111	0.0761015	-2.21004	None
C8orf33	-0.243621	9.60083	-3.60336	0.0065894	0.076146	-2.21128	None
EAF1	-0.227979	6.32018	-3.60304	0.00659255	0.076146	-2.21175	None
PREPL	-1.05158	5.67138	-3.60135	0.00660905	0.0762928	-2.21422	Down
TMEM136	0.335107	6.96181	3.6002	0.00662038	0.0763537	-2.21591	None
ZCCHC18	0.397476	5.02587	3.60004	0.00662193	0.0763537	-2.21615	None
SRGAP2	-0.241112	7.92889	-3.59737	0.00664818	0.0766005	-2.22005	None
WDFY1	-0.306381	7.7525	-3.59691	0.0066527	0.0766005	-2.22073	None
NRBP1	-0.2675	9.0623	-3.59659	0.00665581	0.0766005	-2.22119	None
C19orf25	-0.412694	7.57598	-3.59631	0.00665859	0.0766005	-2.2216	None
CH25H	0.317238	4.23169	3.59528	0.00666882	0.0766742	-2.22312	None
FOXP1	-0.50907	4.24313	-3.59363	0.00668514	0.0767931	-2.22553	None
ATG13	0.298432	7.60872	3.59308	0.00669057	0.0767931	-2.22633	None
PDPK1	-0.82208	7.14316	-3.59305	0.00669085	0.0767931	-2.22637	None
PPIL3	-0.276402	8.72524	-3.59269	0.00669445	0.0767931	-2.22691	None
ELN	0.331919	6.2272	3.58753	0.00674584	0.0773223	-2.23446	None
CDKN2D	-0.364906	6.5749	-3.58703	0.00675088	0.0773223	-2.2352	None
C20orf194 /// UBE2F /// UBE2F-SCLY	-0.272099	6.60501	-3.5869	0.00675213	0.0773223	-2.23538	None
SSRP1	-0.457072	10.4349	-3.58607	0.00676047	0.0773425	-2.2366	None
BANF1	-0.317852	9.86475	-3.58596	0.0067616	0.0773425	-2.23676	None
SKIL	-0.391313	6.82695	-3.58549	0.00676631	0.0773516	-2.23745	None
HNRNPK	-0.232959	11.7773	-3.58511	0.0067701	0.0773516	-2.238	None
FBXO17	-0.282707	7.95442	-3.58183	0.00680309	0.0776844	-2.24281	None
STRBP	-0.281962	9.04237	-3.58113	0.00681025	0.077722	-2.24385	None
PDE6G	0.311494	6.98279	3.57835	0.00683835	0.0779984	-2.24791	None
POC1A	-0.267473	7.98891	-3.57701	0.00685194	0.0781034	-2.24988	None
PNPO	0.370571	9.84102	3.57668	0.00685534	0.0781034	-2.25036	None
MIEF1	-0.720318	7.17902	-3.5761	0.00686122	0.0781261	-2.25121	None
CTSO	0.813187	7.06463	3.57508	0.0068716	0.0781999	-2.2527	None
ARHGEF11	-0.35038	6.43353	-3.57451	0.00687749	0.0782227	-2.25355	None
ADORA1	-0.463147	6.11104	-3.57351	0.0068877	0.0782539	-2.25502	None
DAPK3	0.602681	8.11043	3.57323	0.00689052	0.0782539	-2.25542	None
ARHGAP11A	-0.424331	8.20976	-3.57309	0.00689193	0.0782539	-2.25562	None
ZNF385A	0.311491	6.25474	3.56892	0.00693478	0.0786408	-2.26175	None
ARX	-0.771626	7.37409	-3.56866	0.00693748	0.0786408	-2.26213	None
CSTF2	-0.331314	7.88447	-3.56863	0.00693775	0.0786408	-2.26217	None
LYRM7	-0.44022	4.22503	-3.56699	0.00695466	0.0787423	-2.26457	None
B4GALT5	-0.27209	6.56292	-3.56675	0.0069572	0.0787423	-2.26493	None
VTI1A	-0.40301	6.90857	-3.56663	0.00695845	0.0787423	-2.26511	None
CCDC88B	-0.278413	6.80562	-3.56552	0.00696992	0.0788149	-2.26674	None
LNP1	0.346124	6.55678	3.56525	0.00697272	0.0788149	-2.26714	None
HLA-B	0.727353	7.81499	3.56186	0.00700788	0.07912	-2.2721	None
RNF216P1	0.240935	7.95633	3.56173	0.00700932	0.07912	-2.27231	None
KLHDC7B	0.293404	5.07648	3.56132	0.00701355	0.07912	-2.2729	None
PLEKHG6	0.297305	6.84076	3.56101	0.00701678	0.07912	-2.27336	None
SFI1	-0.451318	5.38375	-3.56035	0.00702368	0.07912	-2.27433	None
OPA1	-0.27183	6.97091	-3.56005	0.00702685	0.07912	-2.27477	None
PSMD5	-0.46523	8.41361	-3.55983	0.00702915	0.07912	-2.2751	None
RPS29	0.472984	7.1544	3.55936	0.00703399	0.07912	-2.27578	None
PSMG3	-0.551486	8.30146	-3.55925	0.00703516	0.07912	-2.27594	None
REV3L	0.693805	8.72956	3.55542	0.00707534	0.0795272	-2.28156	None
LOC647859 /// OCLN	0.299461	7.35733	3.55333	0.00709734	0.07973	-2.28463	None
PSMC3IP	-0.529934	8.07014	-3.5507	0.00712522	0.0799725	-2.2885	None
MYRF	0.276493	7.46634	3.55054	0.00712689	0.0799725	-2.28873	None
HSD17B11	-0.273251	8.55345	-3.54977	0.00713507	0.0799808	-2.28987	None
FRA10AC1	0.262469	6.16507	3.54972	0.0071356	0.0799808	-2.28994	None
FKBP14	-0.701615	7.43858	-3.54763	0.00715786	0.0801745	-2.29302	None
ZBTB20	0.249291	9.04045	3.54734	0.00716086	0.0801745	-2.29343	None
BRD4	-0.247658	8.16896	-3.54629	0.0071721	0.0802284	-2.29498	None
PPP1R14D	0.273759	5.61901	3.54614	0.00717366	0.0802284	-2.2952	None
ALS2	0.25258	7.7615	3.5457	0.00717846	0.0802374	-2.29586	None
CCDC7	0.378041	5.71705	3.54522	0.00718357	0.0802408	-2.29656	None
CEP72	-0.303024	7.71363	-3.5445	0.00719127	0.0802408	-2.29762	None
TLR3	0.399259	3.64207	3.54426	0.00719379	0.0802408	-2.29796	None
ACBD3	0.261633	9.13355	3.54417	0.00719475	0.0802408	-2.29809	None
ZNF451	0.274011	8.11579	3.54329	0.00720417	0.0802973	-2.29939	None
TMEM263	0.452219	8.27101	3.54274	0.0072101	0.0802973	-2.3002	None
ULBP2 /// RAET1L	0.28163	6.50317	3.54131	0.00722546	0.0802973	-2.3023	None
QTRTD1	0.292648	8.26259	3.54109	0.00722782	0.0802973	-2.30262	None
CASC4	-0.945498	8.46857	-3.54082	0.0072308	0.0802973	-2.30303	None
PLA1A	1.60887	5.53424	3.54054	0.00723374	0.0802973	-2.30343	Up
SLC25A13	0.290615	9.44145	3.54037	0.00723564	0.0802973	-2.30369	None
COX5A	-0.256663	12.7537	-3.54036	0.00723572	0.0802973	-2.3037	None
TMEM170B	0.387526	6.71787	3.54035	0.00723579	0.0802973	-2.30371	None
PIDD1	0.257938	7.65726	3.53724	0.00726941	0.0805975	-2.30829	None
PRDM9	0.316177	5.08926	3.53668	0.00727543	0.0805975	-2.30911	None
HTT	0.265838	8.06655	3.53617	0.00728097	0.0805975	-2.30986	None
TOMM22	-0.8299	9.95665	-3.5355	0.00728828	0.0805975	-2.31085	None
PLD2	-0.320845	5.21767	-3.53545	0.00728888	0.0805975	-2.31093	None
CACNA1A	0.464906	5.07831	3.53533	0.00729017	0.0805975	-2.31111	None
CWC22	0.263346	6.76641	3.53513	0.00729233	0.0805975	-2.3114	None
CRYL1	0.325954	6.77828	3.53477	0.00729621	0.0805975	-2.31192	None
TTC39A	0.641975	5.74182	3.53451	0.00729903	0.0805975	-2.31231	None
MRPL39	0.263028	9.51176	3.53415	0.00730297	0.0805975	-2.31284	None
HELLS	-0.375056	8.34199	-3.53328	0.00731241	0.0806574	-2.31411	None
CA12	-0.451059	10.0304	-3.53233	0.00732279	0.0807275	-2.31551	None
BCL2A1	0.77736	4.32394	3.53153	0.00733152	0.0807795	-2.31669	None
MIS12	-0.287315	6.66127	-3.53115	0.00733572	0.0807814	-2.31726	None
DZIP1	-0.335394	7.34365	-3.53036	0.00734437	0.0807978	-2.31842	None
URGCP	-0.311197	7.56871	-3.53027	0.00734526	0.0807978	-2.31854	None
MAGEH1	0.456607	7.40852	3.52871	0.00736238	0.0808986	-2.32084	None
PCDHGA7	0.311446	6.54316	3.5287	0.00736247	0.0808986	-2.32085	None
ZNF592	-0.297508	7.02325	-3.52806	0.00736953	0.0809318	-2.3218	None
ZNF580	-0.28129	7.82509	-3.52695	0.0073817	0.0810212	-2.32343	None
KANK3	0.300949	6.77238	3.52648	0.00738696	0.081026	-2.32413	None
SNRNP25	-0.882468	10.2867	-3.52618	0.00739021	0.081026	-2.32456	None
PRRC2B	-0.7423	8.86737	-3.52552	0.00739752	0.081062	-2.32554	None
MZT2B /// MZT2A	-0.321302	8.97954	-3.52443	0.00740957	0.0811498	-2.32715	None
LURAP1L	0.491747	8.25631	3.52359	0.00741879	0.0811651	-2.32838	None
ADGRB2	0.248587	6.44926	3.52357	0.00741905	0.0811651	-2.32841	None
STK10	0.359262	6.5481	3.52305	0.00742483	0.081184	-2.32918	None
NAA16	-0.252933	4.47933	-3.52192	0.0074373	0.0812335	-2.33084	None
PRKACA	-0.45693	4.53631	-3.52176	0.00743913	0.0812335	-2.33108	None
PPP1R14A	-0.276269	10.6688	-3.52122	0.00744515	0.0812335	-2.33188	None
ZNF121	0.272598	7.41044	3.52118	0.00744553	0.0812335	-2.33193	None
GINM1	0.239882	8.76337	3.52026	0.00745581	0.0813015	-2.33329	None
VRK3	0.27303	8.19588	3.51963	0.0074628	0.0813336	-2.33422	None
CAMTA2	-0.295497	6.83618	-3.51843	0.00747611	0.0814345	-2.33598	None
UHRF1BP1L	-0.280371	6.27963	-3.51573	0.00750636	0.0816269	-2.33996	None
EARS2	-0.686805	7.2664	-3.51569	0.00750677	0.0816269	-2.34002	None
CBX5	-1.04061	6.8229	-3.51546	0.00750939	0.0816269	-2.34036	Down
KCNN2	0.290664	3.73975	3.51527	0.00751144	0.0816269	-2.34063	None
CAPN15	0.223619	8.80248	3.51415	0.00752411	0.0816269	-2.3423	None
ATP8B1	0.250492	8.33505	3.51389	0.00752702	0.0816269	-2.34268	None
BBS9	0.234127	6.26917	3.51368	0.00752938	0.0816269	-2.34299	None
PAGR1	-0.601637	9.66547	-3.51333	0.00753331	0.0816269	-2.3435	None
GNA12	-0.308519	7.05217	-3.51289	0.00753827	0.0816269	-2.34415	None
SYNGR1	0.244223	6.85507	3.51243	0.00754345	0.0816269	-2.34483	None
MTFR1L	-0.321222	7.12598	-3.51217	0.00754633	0.0816269	-2.34521	None
SNX24	-0.296461	7.76791	-3.51211	0.007547	0.0816269	-2.34529	None
ADSSL1	0.72568	7.31507	3.51183	0.0075502	0.0816269	-2.34571	None
ELMO1	-0.352112	5.89348	-3.51178	0.00755073	0.0816269	-2.34578	None
HERC2P9	-0.271261	6.02641	-3.51142	0.00755474	0.0816269	-2.34631	None
RPGRIP1	0.380596	5.3589	3.50883	0.00758411	0.081866	-2.35014	None
FCGR1A /// FCGR1B	0.316148	3.53621	3.50875	0.00758502	0.081866	-2.35026	None
SOD2 /// LOC100129518	0.890772	8.75922	3.50817	0.00759154	0.0818925	-2.35111	None
ZCCHC7 /// LOC105376033	-0.293778	4.65089	-3.50708	0.00760388	0.0819713	-2.35271	None
BIRC3	2.09553	8.86654	3.50681	0.00760702	0.0819713	-2.35312	Up
ARSB	-0.291613	5.84578	-3.50562	0.00762049	0.0820506	-2.35486	None
NID2	-0.270444	7.65548	-3.50531	0.00762408	0.0820506	-2.35533	None
KRTAP6-3	0.307739	3.79798	3.50508	0.00762663	0.0820506	-2.35566	None
AAK1	-0.746379	7.00838	-3.5024	0.00765728	0.0822438	-2.35962	None
BTRC	0.295218	7.2854	3.50221	0.00765945	0.0822438	-2.3599	None
CDS1	-0.485967	5.777	-3.50213	0.00766032	0.0822438	-2.36001	None
HSPBP1	-0.265734	10.2531	-3.50208	0.00766096	0.0822438	-2.36009	None
GRHL1	0.312532	4.3491	3.50131	0.00766972	0.0822938	-2.36122	None
ADSL	-0.494821	11.1402	-3.50014	0.00768315	0.0823939	-2.36295	None
TLE6	0.334747	6.69297	3.4988	0.00769859	0.0825107	-2.36493	None
ROPN1L	0.403793	5.24976	3.49848	0.00770226	0.0825107	-2.3654	None
MAN2B2	0.309821	7.6218	3.49665	0.00772335	0.0826591	-2.3681	None
EEF1E1 /// EEF1E1-BLOC1S5	-0.232722	10.0305	-3.49656	0.00772434	0.0826591	-2.36823	None
PACS2	-0.305113	6.06503	-3.4955	0.00773661	0.0827463	-2.36979	None
SQRDL	-0.252912	10.1236	-3.49498	0.00774268	0.0827578	-2.37057	None
ZNF726	0.383392	5.37914	3.4947	0.00774593	0.0827578	-2.37098	None
HIPK2	-0.317512	6.77029	-3.49431	0.00775038	0.0827613	-2.37155	None
RHOQ	0.272834	7.01175	3.49275	0.00776846	0.0828929	-2.37385	None
SLC17A3	-0.408176	4.30742	-3.49254	0.00777095	0.0828929	-2.37417	None
TAGLN2	-0.228245	12.169	-3.49176	0.00778006	0.082946	-2.37532	None
SDHAF2	0.250359	9.91653	3.49109	0.00778785	0.082985	-2.37631	None
WDR97	0.340353	6.20015	3.49063	0.00779315	0.0829975	-2.37698	None
TSPAN14	0.334412	9.51899	3.48989	0.0078018	0.0830456	-2.37808	None
SOX4	0.262614	8.47947	3.48841	0.00781915	0.0831861	-2.38027	None
BRAF /// KIAA1549	0.264246	6.40027	3.48525	0.0078562	0.083486	-2.38494	None
FHAD1	0.29844	4.47916	3.48519	0.0078568	0.083486	-2.38501	None
ZNF606	0.25426	6.56449	3.48448	0.00786517	0.083486	-2.38606	None
DNM3	0.501085	6.67557	3.48427	0.00786772	0.083486	-2.38638	None
INSIG2	-0.317958	7.41899	-3.48347	0.00787716	0.083486	-2.38757	None
PGBD1	-1.07377	5.09228	-3.48322	0.00788	0.083486	-2.38792	Down
POT1	-0.558636	7.81498	-3.48316	0.00788073	0.083486	-2.38801	None
TRMT5	0.280758	9.1863	3.48309	0.00788161	0.083486	-2.38813	None
PRIM2	-0.297144	7.59651	-3.48282	0.00788475	0.083486	-2.38852	None
MND1	-0.472724	7.98003	-3.48126	0.00790325	0.0836074	-2.39083	None
ANKRD11	-0.240932	9.07727	-3.48097	0.00790664	0.0836074	-2.39126	None
GPSM3	0.263169	5.52963	3.48046	0.00791264	0.0836074	-2.392	None
BRINP1	0.2571	4.1368	3.48044	0.00791286	0.0836074	-2.39203	None
MARK3	0.272331	9.52799	3.47946	0.00792451	0.0836403	-2.39348	None
DHX58	0.239676	5.45091	3.47923	0.00792727	0.0836403	-2.39383	None
FPGT	-0.795263	7.42359	-3.47873	0.0079332	0.0836403	-2.39457	None
RFXAP	-0.463089	5.02674	-3.47856	0.00793518	0.0836403	-2.39481	None
CEP97	0.301781	6.22512	3.47842	0.00793684	0.0836403	-2.39502	None
SH2B3	0.270006	5.96066	3.47808	0.00794096	0.0836403	-2.39553	None
MFSD6	-0.88049	7.2384	-3.47625	0.00796265	0.083815	-2.39822	None
NTN4	0.418825	9.65025	3.47571	0.00796913	0.083815	-2.39903	None
TBC1D22A	-0.335889	6.20682	-3.47563	0.00797006	0.083815	-2.39914	None
WBSCR16	-0.243739	9.47099	-3.47489	0.00797894	0.0838644	-2.40024	None
SNHG11 /// SNORA60	-0.274812	7.74191	-3.47388	0.00799107	0.083948	-2.40174	None
HSPE1	-0.248032	9.68252	-3.47168	0.00801735	0.0841801	-2.40498	None
AP4S1	0.331864	4.87206	3.47064	0.00802984	0.0842671	-2.40652	None
AP4B1	-0.464118	6.3501	-3.46982	0.00803979	0.0843275	-2.40774	None
TTC3	0.478025	9.36058	3.46931	0.0080459	0.0843476	-2.40849	None
GFOD2	-0.306061	7.80503	-3.46842	0.00805665	0.0844162	-2.40981	None
RBM6	-0.278685	7.759	-3.46737	0.00806935	0.084466	-2.41136	None
ARHGEF39	-0.258064	8.15879	-3.46733	0.00806981	0.084466	-2.41142	None
MGST2	-0.224415	9.96802	-3.46642	0.00808084	0.0845372	-2.41277	None
HIST1H4K	0.442077	7.64105	3.46607	0.00808503	0.0845372	-2.41328	None
SH3GLB1	-0.269323	8.63196	-3.46445	0.00810467	0.0846984	-2.41567	None
NBPF1 /// LOC102724250	-0.288676	8.60323	-3.46234	0.00813041	0.0849233	-2.4188	None
GUSBP11	0.261509	5.53257	3.45974	0.00816221	0.0852111	-2.42266	None
FNTB /// CHURC1-FNTB	-0.259911	7.92077	-3.4582	0.00818107	0.0853524	-2.42493	None
ITIH6	0.240996	5.51462	3.45763	0.008188	0.0853524	-2.42577	None
PRAMEF12	0.29412	3.6747	3.45759	0.00818849	0.0853524	-2.42583	None
PTGR1	0.223326	11.946	3.45712	0.00819432	0.0853688	-2.42653	None
TMEM177	-0.318643	8.20408	-3.45605	0.0082074	0.0854607	-2.42811	None
LCE4A	0.350833	5.39332	3.4553	0.00821668	0.0855131	-2.42922	None
DLEU1	-0.43728	8.4055	-3.45411	0.00823135	0.0856214	-2.43098	None
MYL5	0.68719	6.55066	3.45018	0.00828007	0.0860836	-2.43681	None
F8	0.286855	7.38609	3.44904	0.00829418	0.0861557	-2.43849	None
CBFB	-0.28672	7.34864	-3.44893	0.00829559	0.0861557	-2.43865	None
HEPHL1	0.284156	4.8933	3.44828	0.00830369	0.0861693	-2.43962	None
MED6	0.266544	9.75319	3.44796	0.00830772	0.0861693	-2.4401	None
SLAMF7	0.288518	5.58788	3.44779	0.00830976	0.0861693	-2.44034	None
MEIG1	0.261814	4.5551	3.44627	0.00832882	0.086282	-2.4426	None
TNFRSF1B	0.303069	4.19083	3.44624	0.00832923	0.086282	-2.44265	None
WDR26	-0.28676	8.81215	-3.44502	0.00834441	0.0863947	-2.44444	None
PTPRR	0.591122	4.08169	3.44376	0.0083602	0.0865017	-2.44631	None
DNAL1	-0.376284	6.12314	-3.44351	0.00836335	0.0865017	-2.44668	None
VCAM1	0.379181	4.86792	3.44288	0.00837134	0.0865398	-2.44762	None
FLOT2	-0.283442	9.06536	-3.4411	0.00839368	0.0867261	-2.45025	None
INA	0.480473	7.32722	3.43947	0.00841428	0.0868942	-2.45267	None
MAP1LC3B	-0.235374	9.3741	-3.43842	0.00842754	0.0869703	-2.45423	None
APEX2	-0.26046	9.43087	-3.4382	0.00843031	0.0869703	-2.45455	None
ZBTB1	1.30452	5.73295	3.43709	0.00844447	0.0869865	-2.45621	Up
REEP6	0.519394	7.42351	3.43697	0.00844596	0.0869865	-2.45638	None
MAD2L2	-0.347022	8.8913	-3.43684	0.00844754	0.0869865	-2.45657	None
INO80E	-0.476196	8.27593	-3.43671	0.0084492	0.0869865	-2.45676	None
PDXK /// LOC105372824	-0.800603	10.5606	-3.43555	0.00846396	0.0870938	-2.45848	None
TMEM253	0.226026	5.70285	3.43233	0.008505	0.0874419	-2.46326	None
MTURN	0.572318	6.01394	3.43222	0.00850649	0.0874419	-2.46343	None
PLOD3	-0.253379	7.93138	-3.4317	0.00851314	0.0874655	-2.4642	None
FANK1	0.280822	6.13872	3.43135	0.00851761	0.0874666	-2.46472	None
LHX2	-0.297544	5.66646	-3.4284	0.00855538	0.0878096	-2.46908	None
ASF1A	0.293225	8.36651	3.42775	0.00856375	0.0878506	-2.47005	None
KRAS	-0.639623	7.34066	-3.42646	0.00858039	0.0879763	-2.47196	None
ATP8B4	0.464537	5.97743	3.42585	0.00858828	0.0880123	-2.47287	None
STARD13	0.285755	6.10887	3.42502	0.00859904	0.0880777	-2.47411	None
SACM1L	-0.286772	6.75763	-3.42401	0.00861205	0.088166	-2.4756	None
EFNA3	-0.330057	5.71016	-3.42332	0.008621	0.088186	-2.47662	None
SUSD5	0.533564	4.29296	3.42307	0.0086243	0.088186	-2.477	None
TAF4B	0.263623	5.5148	3.42255	0.00863105	0.088186	-2.47777	None
KLHL12	-0.287402	7.89331	-3.42235	0.0086336	0.088186	-2.47806	None
NUP54	0.24445	8.19641	3.42201	0.00863809	0.088186	-2.47858	None
S100P	-1.08269	8.26772	-3.42183	0.00864035	0.088186	-2.47883	Down
MORC3	0.331887	6.34345	3.4212	0.00864852	0.0882246	-2.47977	None
ARHGAP12	0.764075	9.2016	3.42016	0.00866205	0.0883178	-2.48131	None
ALOX12B	0.274957	5.38605	3.41892	0.00867828	0.0884237	-2.48316	None
ECD	0.224972	9.26609	3.41869	0.00868125	0.0884237	-2.48349	None
FAM120C	0.249234	7.72478	3.41693	0.00870427	0.0885932	-2.48611	None
HPGD	0.594564	11.4488	3.41675	0.00870671	0.0885932	-2.48638	None
ACACB	-0.294516	6.72112	-3.41627	0.00871296	0.0886119	-2.48709	None
MSTO1	-0.248144	7.60328	-3.41529	0.00872584	0.0886477	-2.48855	None
FBLN1	-0.602157	5.69354	-3.41505	0.00872901	0.0886477	-2.48891	None
LOC100506417	0.248334	4.33846	3.41499	0.00872972	0.0886477	-2.48899	None
GAS6-AS1	0.372581	6.88057	3.41453	0.00873585	0.0886651	-2.48968	None
SLC45A4	-0.620064	7.57942	-3.41394	0.00874354	0.0886883	-2.49055	None
ZNF283	0.332855	5.69162	3.41368	0.00874697	0.0886883	-2.49093	None
ZACN	0.282152	6.23478	3.41254	0.00876202	0.0887961	-2.49263	None
SLC2A3 /// SLC2A14	0.525716	7.19926	3.41217	0.00876694	0.0888012	-2.49318	None
LOC149950	0.253065	4.71557	3.41067	0.00878669	0.0888506	-2.4954	None
FOXQ1	0.346663	8.09464	3.41066	0.00878688	0.0888506	-2.49542	None
PRAMEF1 /// PRAMEF2 /// PRAMEF13 /// PRAMEF36P /// PRAMEF34P /// PRAMEF14	0.269336	6.34238	3.4106	0.00878758	0.0888506	-2.4955	None
PGC	0.305059	6.41132	3.41046	0.00878951	0.0888506	-2.49572	None
FOXN1	0.264706	5.45973	3.40975	0.00879886	0.0888761	-2.49677	None
NKD2	0.268895	5.46681	3.4096	0.00880088	0.0888761	-2.497	None
WIPI2	0.26471	7.42766	3.40823	0.00881904	0.0889742	-2.49903	None
MXD3	-0.343683	7.72873	-3.4082	0.00881945	0.0889742	-2.49908	None
KLF6	0.725213	9.47747	3.40785	0.00882417	0.0889771	-2.4996	None
ECM1	0.323957	6.25103	3.40713	0.0088337	0.0890285	-2.50067	None
STIL	-0.712636	8.55995	-3.4065	0.00884206	0.089068	-2.5016	None
IL32	1.34483	8.15494	3.40606	0.00884797	0.0890829	-2.50226	Up
CCDC186	0.297413	7.29557	3.40497	0.00886243	0.0891533	-2.50387	None
MFSD1	0.250082	9.12714	3.40487	0.00886384	0.0891533	-2.50403	None
RASSF2	-1.78094	6.69712	-3.40429	0.00887157	0.0891864	-2.50489	Down
[truncated: 18,088 more rows]
